# Supplementary material
Source: PubMed Central journal article supplement (PMC3367894)
Supplement: supp_blood-2012-01-403089_blood-2012-01-403089-1.pdf [file supp_blood-2012-01-403089_blood-2012-01-403089-1.pdf]

**Table S1. Non-competitive repopulation using Ott1-deficient bone marrow.**

| <b>Cell Dose<sup>1</sup></b> | <b>Control (surviving/total)<sup>2</sup></b> | <b>Ott1 KO (surviving/total)<sup>3</sup></b> |
|------------------------------|----------------------------------------------|----------------------------------------------|
| 0                            | 0/2                                          | Not performed                                |
| 0.05x10 <sup>6</sup>         | 0/4                                          | 0/4                                          |
| 0.2x10 <sup>6</sup>          | 1/4                                          | 0/4                                          |
| 0.5x10 <sup>6</sup>          | 3/4                                          | 0/4                                          |
| 1.0x10 <sup>6</sup>          | 4/4                                          | 0/4                                          |
| 5.0x10 <sup>6</sup>          | 3/3                                          | 3/4 <sup>4</sup>                             |

<sup>1</sup> Nucleated cells from whole bone marrow injected via tail vein into lethally irradiated recipients.

<sup>2</sup> Bone marrow from mice with wild type Ott1 allele 6 weeks after plpC treatment.

<sup>3</sup> Bone marrow from Ott1<sup>flox/null</sup> Mx1-cre mice 6 weeks after plpC treatment.

<sup>4</sup> Recipient mice show presence of Ott1<sup>flox</sup> allele indicating engraftment by non-excised cells.

**TABLE S2**

Chambers UP\_WITH\_AGE\_ALL

|                                   |             |
|-----------------------------------|-------------|
| Upregulated in class              | OTT1KO      |
| GeneSet                           | UP_WITH_AGE |
| Enrichment Score (ES)             | 0.2421749   |
| Normalized Enrichment Score (NES) | 1.166678    |
| Nominal p-value                   | 0.0123207   |
| FDR q-value                       | 0.0378227   |
| FWER p-Value                      | 0.0372      |

| NAME   | GENE     | GENE_TITLE                                              | RANK      | RANK         | FOLD        | CORE          |
|--------|----------|---------------------------------------------------------|-----------|--------------|-------------|---------------|
|        |          |                                                         | GENE LIST | METRIC SCORE | RUNNING ES  | CHANGE ENRICH |
| row_0  | SELP     | selectin, platelet                                      | 0         | 3.673389     | 0.004563459 | 6.5380 Yes    |
| row_1  | CALML4   | calmodulin-like 4                                       | 6         | 2.982871     | 0.008026733 | 5.0244 Yes    |
| row_2  | CD38     | CD38 antigen                                            | 12        | 2.601485     | 0.011016211 | 3.5424 Yes    |
| row_3  | NEO1     | neogenin                                                | 15        | 2.536915     | 0.014070885 | 9.3667 Yes    |
| row_4  | GEM      | GTP binding protein                                     | 18        | 2.396166     | 0.016950706 | 3.6524 Yes    |
| row_5  | SELP     | selectin, platelet                                      | 19        | 2.368882     | 0.019893574 | 5.1390 Yes    |
| row_6  | CLU      | clusterin                                               | 22        | 2.268948     | 0.02261535  | 2.6616 Yes    |
| row_7  | SULT1A1  | sulfotransferase family 1A, phenol-preferring, member 1 | 26        | 2.144482     | 0.025134034 | 3.3821 Yes    |
| row_8  | CLU      | clusterin                                               | 29        | 2.137277     | 0.027692236 | 2.5889 Yes    |
| row_9  | TEK      | endothelial-specific receptor tyrosine kinase           | 30        | 2.133659     | 0.030342886 | 2.7105 Yes    |
| row_10 | BGN      | biglycan                                                | 31        | 2.125874     | 0.032983866 | 2.8059 Yes    |
| row_11 | CLU      | clusterin                                               | 35        | 1.999496     | 0.03532243  | 2.7936 Yes    |
| row_12 | PIM2     | proviral integration site 2                             | 36        | 1.989080     | 0.03779347  | 2.7195 Yes    |
| row_13 | BGN      | biglycan                                                | 45        | 1.877414     | 0.039738018 | 2.2025 Yes    |
| row_14 | CLU      | clusterin                                               | 50        | 1.836075     | 0.041825097 | 2.8111 Yes    |
| row_15 | ITGA2B   | integrin alpha 2b                                       | 62        | 1.772908     | 0.043494407 | 2.1858 Yes    |
| row_16 | RAB27B   | RAB27b, member RAS oncogene family                      | 70        | 1.748577     | 0.045327373 | 2.0756 Yes    |
| row_17 | SDPR     | serum deprivation response                              | 75        | 1.720258     | 0.04727057  | 2.1741 Yes    |
| row_18 | JAM2     | junction adhesion molecule 2                            | 78        | 1.698374     | 0.049283523 | 3.2658 Yes    |
| row_19 | BGN      | biglycan                                                | 81        | 1.666934     | 0.051257417 | 2.4381 Yes    |
| row_20 | ASPH     | aspartate-beta-hydroxylase                              | 82        | 1.666048     | 0.053327154 | 2.3083 Yes    |
| row_21 | PPIC     | peptidylprolyl isomerase C                              | 86        | 1.640376     | 0.055219583 | 1.9765 Yes    |
| row_22 | MUC1     | mucin 1, transmembrane                                  | 92        | 1.627312     | 0.056998845 | 1.9737 Yes    |
| row_23 | FZD3     | frizzled homolog 3 (Drosophila)                         | 93        | 1.627115     | 0.05902021  | 1.9648 Yes    |
| row_24 | PRICKLE1 | prickle like 1 (Drosophila)                             | 100       | 1.604554     | 0.060722727 | 1.9451 Yes    |
| row_25 | RAMP2    | receptor (calcitonin) activity modifying protein 2      | 112       | 1.549013     | 0.062113892 | 2.5185 Yes    |
| row_26 | GHR      | growth hormone receptor                                 | 127       | 1.498179     | 0.06329649  | 2.2265 Yes    |
| row_27 | LMAN1    | lectin, mannose-binding, 1                              | 130       | 1.493228     | 0.065054595 | 1.8516 Yes    |
| row_28 | PRKCA    | protein kinase C, alpha                                 | 131       | 1.489532     | 0.066905044 | 1.9396 Yes    |
| row_29 | CLCA1    | chloride channel calcium activated 1                    | 134       | 1.488915     | 0.068657786 | 3.4813 Yes    |

|        |         |                                                                    |     |          |             |        |     |
|--------|---------|--------------------------------------------------------------------|-----|----------|-------------|--------|-----|
| row_30 | F11R    | F11 receptor                                                       | 136 | 1.483640 | 0.070452444 | 1.8438 | Yes |
| row_31 | SLC7A7  | solute carrier family 7                                            | 146 | 1.465292 | 0.07183654  | 1.8563 | Yes |
| row_32 | CLCA1   | chloride channel calcium activated 1                               | 160 | 1.424618 | 0.072976224 | 3.2962 | Yes |
| row_33 | CXCL16  | chemokine (C-X-C motif) ligand 16                                  | 162 | 1.418001 | 0.07468934  | 2.1837 | Yes |
| row_34 | GSTM2   | glutathione S-transferase, mu 2                                    | 184 | 1.377998 | 0.07538334  | 3.5219 | Yes |
| row_35 | DAG1    | dystroglycan 1                                                     | 187 | 1.376940 | 0.07699698  | 1.7601 | Yes |
| row_36 | PCLO    | piccolo (presynaptic cytomatrix protein)                           | 192 | 1.368484 | 0.07850317  | 2.8325 | Yes |
| row_37 | TIE1    | tyrosine kinase receptor 1                                         | 206 | 1.339600 | 0.079537235 | 1.9236 | Yes |
| row_38 | ADD3    | adducin 3 (gamma)                                                  | 218 | 1.313112 | 0.08063534  | 1.7123 | Yes |
| row_39 | PBX3    | pre B-cell leukemia transcription factor 3                         | 221 | 1.309646 | 0.082165375 | 2.4242 | Yes |
| row_40 | PMP22   | peripheral myelin protein                                          | 228 | 1.300549 | 0.08349022  | 1.8919 | Yes |
| row_41 | PODXL   | podocalyxin-like                                                   | 244 | 1.273562 | 0.08434531  | 1.8414 | Yes |
| row_42 | USP38   | ubiquitin specific peptidase 38                                    | 255 | 1.253043 | 0.08541726  | 1.6823 | Yes |
| row_43 | RAB14   | RAB14, member RAS oncogene family                                  | 256 | 1.252982 | 0.086973846 | 1.6706 | Yes |
| row_44 | ULK2    | Unc-51 like kinase 2 (C. elegans)                                  | 260 | 1.244353 | 0.0883743   | 2.1750 | Yes |
| row_45 | PTPN12  | protein tyrosine phosphatase, non-receptor type 12                 | 270 | 1.231542 | 0.08946801  | 1.6536 | Yes |
| row_46 | SH3D19  | SH3 domain protein D19                                             | 272 | 1.227529 | 0.0909445   | 1.6508 | Yes |
| row_47 | STAU2   | staufen (RNA binding protein) homolog 2 (Drosophila)               | 275 | 1.224578 | 0.092368856 | 2.3749 | Yes |
| row_48 | SNRPD3  | small nuclear ribonucleoprotein D3                                 | 288 | 1.204993 | 0.093284175 | 1.6350 | Yes |
| row_49 | PFTK1   | PFTAIRE protein kinase 1                                           | 291 | 1.203982 | 0.09468294  | 1.9078 | Yes |
| row_50 | RAB27B  | RAB27b, member RAS oncogene family                                 | 303 | 1.193545 | 0.09563251  | 1.6271 | Yes |
| row_51 | CDC5L   | cell division cycle 5-like (S. pombe)                              | 307 | 1.190194 | 0.09696567  | 1.9981 | Yes |
| row_52 | CTTN    | cortactin                                                          | 337 | 1.157354 | 0.096997805 | 1.6024 | Yes |
| row_53 | CTTN    | cortactin                                                          | 343 | 1.149418 | 0.09818338  | 1.5970 | Yes |
| row_54 | SDPR    | serum deprivation response                                         | 351 | 1.139193 | 0.0992593   | 1.7810 | Yes |
| row_55 | CTTN    | cortactin                                                          | 353 | 1.138019 | 0.1006246   | 1.5893 | Yes |
| row_56 | TM4SF1  | transmembrane 4 superfamily member 1                               | 354 | 1.137760 | 0.10203803  | 2.9735 | Yes |
| row_57 | KHDRBS3 | KH domain containing, RNA binding, signal transduction asso        | 368 | 1.126257 | 0.10280707  | 1.5815 | Yes |
| row_58 | FIGNL1  | fidgetin-like 1                                                    | 391 | 1.109720 | 0.10311932  | 1.6135 | Yes |
| row_59 | NEDD4   | neural precursor cell expressed, developmentally down-regult       | 398 | 1.106502 | 0.104203105 | 1.5684 | Yes |
| row_60 | DAG1    | dystroglycan 1                                                     | 425 | 1.085421 | 0.10429129  | 1.6191 | Yes |
| row_61 | FKBP9   | FK506 binding protein 9                                            | 429 | 1.083224 | 0.10549156  | 1.6591 | Yes |
| row_62 | DSC2    | desmocollin 2                                                      | 432 | 1.079879 | 0.10673616  | 2.3060 | Yes |
| row_63 | EHD4    | EH-domain containing 4                                             | 437 | 1.075869 | 0.107878834 | 1.5483 | Yes |
| row_64 | CITED2  | Cbp/p300-interacting transactivator, with Glu/Asp-rich carboxy     | 445 | 1.071040 | 0.1088701   | 2.1354 | Yes |
| row_65 | TPM3    | tropomyosin 3, gamma                                               | 450 | 1.068676 | 0.11000383  | 1.6195 | Yes |
| row_66 | METAP1  | methionyl aminopeptidase 1                                         | 460 | 1.063009 | 0.11088817  | 1.7333 | Yes |
| row_67 | SLC1A1  | solute carrier family 1 (neuronal/epithelial high affinity glutama | 463 | 1.062025 | 0.112110585 | 1.6192 | Yes |
| row_68 | JAM2    | junction adhesion molecule 2                                       | 464 | 1.061828 | 0.113429695 | 1.5392 | Yes |
| row_69 | PJA2    | praja 2, RING-H2 motif containing                                  | 470 | 1.056909 | 0.114500344 | 1.5588 | Yes |
| row_70 | CRTAP   | cartilage associated protein                                       | 491 | 1.045080 | 0.114829235 | 1.5448 | Yes |
| row_71 | PROS1   | protein S (alpha)                                                  | 492 | 1.044777 | 0.11612716  | 1.5337 | Yes |
| row_72 | DLG5    | discs, large homolog 5 (Drosophila)                                | 502 | 1.037115 | 0.11697934  | 1.9467 | Yes |
| row_73 | SOAT1   | Sterol O-acyltransferase 1                                         | 508 | 1.034346 | 0.11802196  | 1.5262 | Yes |
| row_74 | LPHN1   | latrophilin 1                                                      | 518 | 1.029373 | 0.11886451  | 1.5185 | Yes |
| row_75 | KIF1B   | kinesin family member 1B                                           | 519 | 1.027754 | 0.12014129  | 1.5175 | Yes |
| row_76 | GALNT1  | UDP-N-acetyl-alpha-D-galactosamine:polypeptide N-acetylgl          | 521 | 1.026599 | 0.12136816  | 1.5368 | Yes |

|         |          |                                                                                  |     |          |             |        |     |
|---------|----------|----------------------------------------------------------------------------------|-----|----------|-------------|--------|-----|
| row_77  | HK1      | hexokinase 1                                                                     | 543 | 1.011801 | 0.121607244 | 1.6136 | Yes |
| row_78  | SYNPO    | synaptopodin                                                                     | 553 | 1.008425 | 0.122423775 | 1.5053 | Yes |
| row_79  | F2RL3    | coagulation factor II (thrombin) receptor-like 3                                 | 563 | 1.001574 | 0.1232318   | 1.6010 | Yes |
| row_80  | PLXNC1   | plexin C1                                                                        | 571 | 0.997527 | 0.12413173  | 1.6407 | Yes |
| row_81  | CRNKL1   | Crn, crooked neck-like 1 (Drosophila)                                            | 573 | 0.995997 | 0.12532058  | 1.5413 | Yes |
| row_82  | TNFRSF21 | tumor necrosis factor receptor superfamily, member 21                            | 576 | 0.993949 | 0.12645844  | 1.5009 | Yes |
| row_83  | ST13     | Suppression of tumorigenicity 13                                                 | 585 | 0.989058 | 0.12729937  | 1.4932 | Yes |
| row_84  | SPRED1   | sprouty protein with EVH-1 domain 1, related sequence                            | 587 | 0.988501 | 0.12847893  | 1.4928 | Yes |
| row_85  | PPM1A    | protein phosphatase 1A, magnesium dependent, alpha isoform                       | 598 | 0.983344 | 0.12921582  | 1.4896 | Yes |
| row_86  | KCTD5    | potassium channel tetramerisation domain containing 5                            | 608 | 0.978877 | 0.12999564  | 1.5398 | Yes |
| row_87  | SMAP1    | stromal membrane-associated protein 1                                            | 612 | 0.977706 | 0.13106485  | 1.4941 | Yes |
| row_88  | SNAP23   | synaptosomal-associated protein 23                                               | 620 | 0.972897 | 0.13193418  | 1.4832 | Yes |
| row_89  | FHL1     | four and a half LIM domains 1                                                    | 645 | 0.957056 | 0.13195984  | 1.6106 | Yes |
| row_90  | FUT8     | fucosyltransferase 8                                                             | 646 | 0.956854 | 0.13314854  | 1.4733 | Yes |
| row_91  | TIMP3    | tissue inhibitor of metalloproteinase 3                                          | 648 | 0.955546 | 0.13428715  | 1.5496 | Yes |
| row_92  | SPRED2   | sprouty-related, EVH1 domain containing 2                                        | 650 | 0.954627 | 0.13542461  | 1.4720 | Yes |
| row_93  | SDC2     | syndecan 2                                                                       | 661 | 0.947379 | 0.13611683  | 1.4675 | Yes |
| row_94  | PTPRK    | protein tyrosine phosphatase, receptor type, K                                   | 662 | 0.946955 | 0.13729323  | 1.6811 | Yes |
| row_95  | CITED2   | Cbp/p300-interacting transactivator, with Glu/Asp-rich carboxy-terminal domain 2 | 666 | 0.943907 | 0.13832045  | 1.4654 | Yes |
| row_96  | PEX13    | peroxisomal biogenesis factor 13                                                 | 682 | 0.937593 | 0.13875815  | 1.4616 | Yes |
| row_97  | CD151    | CD151 antigen                                                                    | 687 | 0.936437 | 0.1397276   | 1.4609 | Yes |
| row_98  | BAZ1B    | bromodomain adjacent to zinc finger domain, 1B                                   | 695 | 0.934108 | 0.14054875  | 1.4793 | Yes |
| row_99  | IPO11    | importin 11                                                                      | 696 | 0.934096 | 0.1417092   | 1.4595 | Yes |
| row_100 | SENP6    | SUMO/sentrin specific peptidase 6                                                | 708 | 0.929438 | 0.14233065  | 1.4567 | Yes |
| row_101 | DSCR1    | Down syndrome critical region homolog 1 (human)                                  | 712 | 0.928337 | 0.14333852  | 1.4560 | Yes |
| row_102 | NEO1     | neogenin                                                                         | 720 | 0.925510 | 0.14414899  | 3.0471 | Yes |
| row_103 | SH3D19   | SH3 domain protein D19                                                           | 726 | 0.922927 | 0.14505318  | 1.5989 | Yes |
| row_104 | SRR      | serine racemase                                                                  | 733 | 0.919248 | 0.14590435  | 1.4660 | Yes |
| row_105 | GJA1     | gap junction membrane channel protein alpha 1                                    | 737 | 0.914345 | 0.14689483  | 1.4476 | Yes |
| row_106 | NEDD9    | neural precursor cell expressed, developmentally down-regulated 9                | 752 | 0.910200 | 0.14734697  | 1.4451 | Yes |
| row_107 | CPSF2    | cleavage and polyadenylation specific factor 2                                   | 767 | 0.902749 | 0.14778988  | 1.6496 | Yes |
| row_108 | SLC14A1  | solute carrier family 14 (urea transporter), member 1                            | 769 | 0.902481 | 0.14886256  | 1.4405 | Yes |
| row_109 | FAP      | fibroblast activation protein                                                    | 775 | 0.901157 | 0.14973971  | 1.7657 | Yes |
| row_110 | CPSF2    | cleavage and polyadenylation specific factor 2                                   | 786 | 0.897441 | 0.1503699   | 1.4375 | Yes |
| row_111 | RYK      | receptor-like tyrosine kinase                                                    | 789 | 0.895698 | 0.15138568  | 1.4365 | Yes |
| row_112 | SIAH2    | seven in absentia 2                                                              | 792 | 0.894323 | 0.15239976  | 1.4357 | Yes |
| row_113 | F2R      | coagulation factor II (thrombin) receptor                                        | 797 | 0.888864 | 0.15331012  | 1.5341 | Yes |
| row_114 | LGALS3BP | lectin, galactoside-binding, soluble, 3 binding protein                          | 808 | 0.885217 | 0.15392512  | 1.4303 | Yes |
| row_115 | PLXNC1   | plexin C1                                                                        | 812 | 0.883870 | 0.15487774  | 1.4295 | Yes |
| row_116 | CD151    | CD151 antigen                                                                    | 817 | 0.882499 | 0.15578018  | 1.4617 | Yes |
| row_117 | SLC14A1  | solute carrier family 14 (urea transporter), member 1                            | 819 | 0.882428 | 0.15682796  | 1.4830 | Yes |
| row_118 | CD38     | CD38 antigen                                                                     | 826 | 0.879175 | 0.15762934  | 1.4267 | Yes |
| row_119 | SLCO3A1  | solute carrier organic anion transporter family, member 3a1                      | 835 | 0.875509 | 0.15832922  | 1.4245 | Yes |
| row_120 | ABCC1    | ATP-binding cassette, sub-family C (CFTR/MRP), member 1                          | 843 | 0.872976 | 0.15907443  | 1.4785 | Yes |
| row_121 | NUDT11   | nudix (nucleoside diphosphate linked moiety X)-type motif 11                     | 850 | 0.870310 | 0.15986478  | 1.5653 | Yes |
| row_122 | SLAMF1   | signaling lymphocytic activation molecule family member 1                        | 851 | 0.869845 | 0.1609454   | 2.5388 | Yes |
| row_123 | SLC12A2  | solute carrier family 12, member 2                                               | 868 | 0.861938 | 0.16124065  | 1.4316 | Yes |

|         |         |                                                           |      |          |            |        |     |
|---------|---------|-----------------------------------------------------------|------|----------|------------|--------|-----|
| row_124 | LCP2    | lymphocyte cytosolic protein 2                            | 870  | 0.861760 | 0.16226275 | 1.4165 | Yes |
| row_125 | HS2ST1  | heparan sulfate 2-O-sulfotransferase 1                    | 896  | 0.853973 | 0.16211186 | 1.4182 | Yes |
| row_126 | SMAP1   | stromal membrane-associated protein 1                     | 921  | 0.845158 | 0.16199851 | 1.5178 | Yes |
| row_127 | CTF1    | cardiotrophin 1                                           | 942  | 0.837516 | 0.16206954 | 1.4367 | Yes |
| row_128 | FOSB    | FBJ osteosarcoma oncogene B                               | 948  | 0.833582 | 0.16286275 | 4.8173 | Yes |
| row_129 | MCOLN1  | mucolipin 1                                               | 951  | 0.833154 | 0.16380084 | 1.3999 | Yes |
| row_130 | SLAMF1  | signaling lymphocytic activation molecule family member 1 | 954  | 0.831777 | 0.16473722 | 2.4328 | Yes |
| row_131 | MTAC2D1 | membrane targeting (tandem) C2 domain containing 1        | 963  | 0.829067 | 0.1653794  | 1.3975 | Yes |
| row_132 | MAPK6   | mitogen-activated protein kinase 6                        | 971  | 0.826492 | 0.16606686 | 1.5978 | Yes |
| row_133 | PLSCR1  | phospholipid scramblase 1                                 | 976  | 0.824932 | 0.16689779 | 1.3952 | Yes |
| row_134 | ARHGAP5 | Rho GTPase activating protein 5                           | 985  | 0.822737 | 0.16753212 | 1.5062 | Yes |
| row_135 | NUP62   | nucleoporin 62                                            | 988  | 0.822593 | 0.16845709 | 1.3938 | Yes |
| row_136 | CPEB4   | cytoplasmic polyadenylation element binding protein 4     | 999  | 0.817485 | 0.16898794 | 1.3909 | Yes |
| row_137 | FOSL1   | fos-like antigen 1                                        | 1025 | 0.810453 | 0.168783   | 1.7972 | Yes |
| row_138 | S100A6  | S100 calcium binding protein A6 (calcyclin)               | 1036 | 0.806651 | 0.16930039 | 1.6541 | Yes |
| row_139 | GOLPH3  | golgi phosphoprotein 3                                    | 1044 | 0.801128 | 0.16995634 | 1.5229 | Yes |
| row_140 | PLXNC1  | plexin C1                                                 | 1055 | 0.797793 | 0.17046274 | 1.4843 | Yes |
| row_141 | CUL3    | cullin 3                                                  | 1060 | 0.796311 | 0.1712581  | 1.3789 | Yes |
| row_142 | BAG4    | BCL2-associated athanogene 4                              | 1087 | 0.788052 | 0.17097688 | 1.4045 | Yes |
| row_143 | NCBP2   | nuclear cap binding protein subunit 2                     | 1097 | 0.784949 | 0.17151578 | 1.3725 | Yes |
| row_144 | FKBP9   | FK506 binding protein 9                                   | 1101 | 0.783235 | 0.17234339 | 1.5213 | Yes |
| row_145 | ACBD6   | acyl-Coenzyme A binding domain containing 6               | 1104 | 0.782733 | 0.17321883 | 1.3712 | Yes |
| row_146 | MAGEE1  | melanoma antigen, family E, 1                             | 1106 | 0.782694 | 0.1741427  | 1.6591 | Yes |
| row_147 | TBC1D15 | TBC1 domain family, member 15                             | 1111 | 0.781927 | 0.17492022 | 1.5294 | Yes |
| row_148 | NCK1    | non-catalytic region of tyrosine kinase adaptor protein 1 | 1114 | 0.781603 | 0.17579426 | 1.3706 | Yes |
| row_149 | CD9     | CD9 antigen                                               | 1118 | 0.780707 | 0.17661873 | 1.6046 | Yes |
| row_150 | SOS1    | Son of sevenless homolog 1 (Drosophila)                   | 1121 | 0.777703 | 0.17748792 | 1.4150 | Yes |
| row_151 | CRK     | v-crk sarcoma virus CT10 oncogene homolog (avian)         | 1124 | 0.777230 | 0.17835653 | 1.7501 | Yes |
| row_152 | CRYZ    | crystallin, zeta                                          | 1155 | 0.770646 | 0.17785978 | 1.4145 | Yes |
| row_153 | ITGB1   | integrin beta 1 (fibronectin receptor beta)               | 1165 | 0.768397 | 0.17837813 | 1.3632 | Yes |
| row_154 | DAG1    | dystroglycan 1                                            | 1180 | 0.765223 | 0.17865017 | 1.3614 | Yes |
| row_155 | FOXA3   | forkhead box A3                                           | 1183 | 0.764738 | 0.17950328 | 1.6030 | Yes |
| row_156 | SOCS3   | suppressor of cytokine signaling 3                        | 1192 | 0.762770 | 0.1800631  | 1.5911 | Yes |
| row_157 | MYCBP   | c-myc binding protein                                     | 1199 | 0.761934 | 0.18071882 | 1.3596 | Yes |
| row_158 | IMMT    | inner membrane protein, mitochondrial                     | 1200 | 0.761879 | 0.1816653  | 1.3797 | Yes |
| row_159 | H1F0    | H1 histone family, member 0                               | 1216 | 0.756791 | 0.1818784  | 1.3567 | Yes |
| row_160 | NUP62   | nucleoporin 62                                            | 1221 | 0.755148 | 0.18262264 | 1.3558 | Yes |
| row_161 | PTPN2   | protein tyrosine phosphatase, non-receptor type 2         | 1247 | 0.751019 | 0.18234387 | 1.6870 | Yes |
| row_162 | MTMR1   | myotubularin related protein 1                            | 1258 | 0.748158 | 0.1827886  | 1.3519 | Yes |
| row_163 | DNAJC3  | DnaJ (Hsp40) homolog, subfamily C, member 3               | 1264 | 0.746631 | 0.1834738  | 1.3511 | Yes |
| row_164 | BHLHB2  | basic helix-loop-helix domain containing, class B2        | 1289 | 0.740031 | 0.18322983 | 1.3474 | Yes |
| row_165 | NR4A2   | nuclear receptor subfamily 4, group A, member 2           | 1290 | 0.739724 | 0.18414879 | 1.3473 | Yes |
| row_166 | SH3D19  | SH3 domain protein D19                                    | 1295 | 0.737694 | 0.18487135 | 1.4132 | Yes |
| row_167 | ITGA6   | integrin alpha 6                                          | 1305 | 0.735056 | 0.18534827 | 1.5505 | Yes |
| row_168 | PTGS2   | prostaglandin-endoperoxide synthase 2                     | 1315 | 0.730470 | 0.1858195  | 2.1276 | Yes |
| row_169 | WDR26   | WD repeat domain 26                                       | 1316 | 0.730461 | 0.18672696 | 1.5639 | Yes |
| row_170 | ASH1L   | ash1 (absent, small, or homeotic)-like (Drosophila)       | 1322 | 0.729511 | 0.18739088 | 1.3417 | Yes |

|         |          |                                                                 |      |          |            |        |     |
|---------|----------|-----------------------------------------------------------------|------|----------|------------|--------|-----|
| row_171 | LPHN1    | latrophilin 1                                                   | 1328 | 0.728523 | 0.18805356 | 1.3411 | Yes |
| row_172 | GUCY1B3  | guanylate cyclase 1, soluble, beta 3                            | 1351 | 0.722685 | 0.187885   | 1.5597 | Yes |
| row_173 | FNDC4    | fibronectin type III domain containing 4                        | 1353 | 0.722622 | 0.18873425 | 1.3875 | Yes |
| row_174 | MPL      | myeloproliferative leukemia virus oncogene                      | 1369 | 0.717400 | 0.18889841 | 1.3350 | Yes |
| row_175 | MCOLN1   | mucolipin 1                                                     | 1370 | 0.717373 | 0.18978961 | 1.3350 | Yes |
| row_176 | RRAGA    | Ras-related GTP binding A                                       | 1382 | 0.712563 | 0.19014165 | 1.3324 | Yes |
| row_177 | CTSB     | cathepsin B                                                     | 1399 | 0.709345 | 0.19024734 | 1.3306 | Yes |
| row_178 | DECR1    | 2,4-dienoyl CoA reductase 1, mitochondrial                      | 1436 | 0.699641 | 0.18937156 | 1.3254 | Yes |
| row_179 | NR4A2    | nuclear receptor subfamily 4, group A, member 2                 | 1451 | 0.696350 | 0.18955804 | 2.0244 | Yes |
| row_180 | CXCL16   | chemokine (C-X-C motif) ligand 16                               | 1453 | 0.696023 | 0.19037424 | 1.5099 | Yes |
| row_181 | SDC2     | syndecan 2                                                      | 1463 | 0.694572 | 0.19080088 | 1.3371 | Yes |
| row_182 | ARF6     | ADP-ribosylation factor 6                                       | 1469 | 0.693604 | 0.19142018 | 1.3221 | Yes |
| row_183 | ATP8A1   | ATPase, aminophospholipid transporter (APLT), class I, type I   | 1477 | 0.692608 | 0.19194132 | 1.3216 | Yes |
| row_184 | HERPUD1  | homocysteine-inducible, endoplasmic reticulum stress-inducible  | 1481 | 0.692039 | 0.19265562 | 1.3213 | Yes |
| row_185 | CRYZ     | Crystallin, zeta                                                | 1484 | 0.691518 | 0.19341776 | 1.3210 | Yes |
| row_186 | PPM1A    | protein phosphatase 1A, magnesium dependent, alpha isoform      | 1487 | 0.691163 | 0.19417945 | 1.3705 | Yes |
| row_187 | NBEA     | neurobeachin                                                    | 1518 | 0.687001 | 0.1935788  | 1.7413 | Yes |
| row_188 | NSF      | N-ethylmaleimide sensitive fusion protein                       | 1538 | 0.683116 | 0.19350648 | 1.3165 | Yes |
| row_189 | TNFRSF21 | tumor necrosis factor receptor superfamily, member 21           | 1570 | 0.675394 | 0.19284293 | 1.5273 | Yes |
| row_190 | DAG1     | dystroglycan 1                                                  | 1582 | 0.672619 | 0.19314535 | 1.3613 | Yes |
| row_191 | NEDD4    | neural precursor cell expressed, developmentally down-regulated | 1592 | 0.671012 | 0.19354272 | 1.3100 | Yes |
| row_192 | TIAM1    | T-cell lymphoma invasion and metastasis 1                       | 1595 | 0.670820 | 0.19427913 | 1.3099 | Yes |
| row_193 | CDV3     | carnitine deficiency-associated gene expressed in ventricle 3   | 1604 | 0.669169 | 0.19472268 | 1.6492 | Yes |
| row_194 | CLNS1A   | chloride channel, nucleotide-sensitive, 1A                      | 1610 | 0.667292 | 0.19530931 | 1.5420 | Yes |
| row_195 | PLA2G4A  | phospholipase A2, group IVA (cytosolic, calcium-dependent)      | 1630 | 0.663395 | 0.1952125  | 1.4031 | Yes |
| row_196 | GNS      | glucosamine (N-acetyl)-6-sulfatase                              | 1633 | 0.662502 | 0.19593859 | 1.3055 | Yes |
| row_197 | SERPINI1 | serine (or cysteine) peptidase inhibitor, clade I, member 1     | 1640 | 0.661587 | 0.19646965 | 1.3050 | Yes |
| row_198 | BTBD14A  | BTB (POZ) domain containing 14A                                 | 1654 | 0.659595 | 0.19665895 | 1.3039 | Yes |
| row_199 | MYH9     | myosin, heavy polypeptide 9, non-muscle                         | 1662 | 0.658306 | 0.19713748 | 1.3032 | Yes |
| row_200 | PLOD2    | procollagen lysine, 2-oxoglutarate 5-dioxygenase 2              | 1670 | 0.657438 | 0.19761491 | 1.4031 | Yes |
| row_201 | STX12    | syntaxin 12                                                     | 1673 | 0.657012 | 0.19833417 | 1.3026 | Yes |
| row_202 | SPOP     | speckle-type POZ protein                                        | 1674 | 0.656880 | 0.19915022 | 1.5012 | Yes |
| row_203 | SPRY1    | sprouty homolog 1 (Drosophila)                                  | 1682 | 0.655763 | 0.19962558 | 1.3723 | Yes |
| row_204 | MMP8     | matrix metalloproteinase 8                                      | 1684 | 0.655503 | 0.20039144 | 1.3018 | Yes |
| row_205 | CAMK2D   | calcium/calmodulin-dependent protein kinase II, delta           | 1693 | 0.654047 | 0.2008162  | 1.3010 | Yes |
| row_206 | PBEF1    | pre-B-cell colony-enhancing factor 1                            | 1699 | 0.653266 | 0.2013854  | 1.4553 | Yes |
| row_207 | JAK1     | Janus kinase 1                                                  | 1703 | 0.652634 | 0.20205076 | 1.3002 | Yes |
| row_208 | CNOT7    | CCR4-NOT transcription complex, subunit 7                       | 1717 | 0.650717 | 0.20222902 | 1.5182 | Yes |
| row_209 | PHLDA1   | pleckstrin homology-like domain, family A, member 1             | 1719 | 0.649778 | 0.20298778 | 1.8218 | Yes |
| row_210 | CCT3     | chaperonin subunit 3 (gamma)                                    | 1728 | 0.647677 | 0.20340462 | 1.5576 | Yes |
| row_211 | OCLN     | occludin                                                        | 1758 | 0.641931 | 0.20279644 | 1.3039 | Yes |
| row_212 | BCL10    | B-cell leukemia/lymphoma 10                                     | 1769 | 0.640040 | 0.20310685 | 1.2949 | Yes |
| row_213 | SOCS6    | suppressor of cytokine signaling 6                              | 1771 | 0.639602 | 0.20385297 | 1.4313 | Yes |
| row_214 | MRPL50   | mitochondrial ribosomal protein L50                             | 1776 | 0.638567 | 0.20445238 | 1.3408 | Yes |
| row_215 | ITGA6    | integrin alpha 6                                                | 1789 | 0.636206 | 0.20466109 | 1.2916 | Yes |
| row_216 | ILK      | integrin linked kinase                                          | 1791 | 0.635791 | 0.20540246 | 1.2914 | Yes |
| row_217 | FECH     | ferrochelatase                                                  | 1798 | 0.634916 | 0.20590039 | 1.2909 | Yes |

|         |           |                                                                    |      |          |            |        |     |
|---------|-----------|--------------------------------------------------------------------|------|----------|------------|--------|-----|
| row_218 | NUP62     | nucleoporin 62                                                     | 1801 | 0.634511 | 0.20659171 | 1.2907 | Yes |
| row_219 | SLC39A6   | solute carrier family 39 (metal ion transporter), member 6         | 1809 | 0.633111 | 0.20703892 | 1.5077 | Yes |
| row_220 | NCK1      | non-catalytic region of tyrosine kinase adaptor protein 1          | 1823 | 0.629703 | 0.20719108 | 1.2882 | Yes |
| row_221 | ARF2      | ADP-ribosylation factor 2                                          | 1843 | 0.626481 | 0.20704842 | 1.2865 | Yes |
| row_222 | CLIC4     | chloride intracellular channel 4 (mitochondrial)                   | 1847 | 0.626088 | 0.2076808  | 1.2890 | Yes |
| row_223 | PURB      | purine rich element binding protein B                              | 1854 | 0.624837 | 0.20816621 | 1.3918 | Yes |
| row_224 | ST7L      | suppression of tumorigenicity 7-like                               | 1855 | 0.624804 | 0.20894241 | 1.2856 | Yes |
| row_225 | KIF1B     | kinesin family member 1B                                           | 1859 | 0.623866 | 0.20957203 | 1.2851 | Yes |
| row_226 | PJA2      | praja 2, RING-H2 motif containing                                  | 1861 | 0.623724 | 0.2102984  | 1.3783 | Yes |
| row_227 | ADAM10    | a disintegrin and metallopeptidase domain 10                       | 1869 | 0.622195 | 0.21073207 | 1.2842 | Yes |
| row_228 | PPP1R2    | protein phosphatase 1, regulatory (inhibitor) subunit 2            | 1902 | 0.617377 | 0.20994797 | 1.2817 | Yes |
| row_229 | MYNN      | myoneurin                                                          | 1911 | 0.616497 | 0.21032608 | 1.2864 | Yes |
| row_230 | SOCS6     | suppressor of cytokine signaling 6                                 | 1920 | 0.615011 | 0.21070234 | 1.2805 | Yes |
| row_231 | JAM2      | junction adhesion molecule 2                                       | 1944 | 0.611679 | 0.21034741 | 1.2788 | Yes |
| row_232 | GOLGA4    | golgi autoantigen, golgin subfamily a, 4                           | 1953 | 0.610588 | 0.21071818 | 1.2782 | Yes |
| row_233 | PRKCH     | protein kinase C, eta                                              | 1999 | 0.603640 | 0.2092869  | 1.4922 | Yes |
| row_234 | TFG       | Trk-fused gene                                                     | 2016 | 0.600560 | 0.20925744 | 1.2730 | Yes |
| row_235 | JAK1      | Janus kinase 1                                                     | 2027 | 0.599805 | 0.20951788 | 1.2726 | Yes |
| row_236 | GOPC      | golgi associated PDZ and coiled-coil motif containing              | 2035 | 0.598740 | 0.20992239 | 1.3056 | Yes |
| row_237 | NT5C3     | 5'-nucleotidase, cytosolic III                                     | 2039 | 0.598173 | 0.21052009 | 1.2718 | Yes |
| row_238 | HS2ST1    | heparan sulfate 2-O-sulfotransferase 1                             | 2040 | 0.597982 | 0.21126297 | 1.2717 | Yes |
| row_239 | ARL6IP2   | ADP-ribosylation factor-like 6 interacting protein 2               | 2051 | 0.597013 | 0.21151993 | 1.7165 | Yes |
| row_240 | ARL2BP    | ADP-ribosylation factor-like 2 binding protein                     | 2066 | 0.594364 | 0.21157973 | 1.2698 | Yes |
| row_241 | QSCN6     | quiescin Q6                                                        | 2081 | 0.591586 | 0.21163605 | 1.2684 | Yes |
| row_242 | SLC1A1    | solute carrier family 1 (neuronal/epithelial high affinity glutama | 2090 | 0.590561 | 0.21198195 | 1.3007 | Yes |
| row_243 | CTTN      | cortactin                                                          | 2100 | 0.589306 | 0.21227781 | 1.2672 | Yes |
| row_244 | SAT1      | spermidine/spermine N1-acetyl transferase 1                        | 2104 | 0.588801 | 0.21286386 | 1.3180 | Yes |
| row_245 | KLHL13    | kelch-like 13 (Drosophila)                                         | 2109 | 0.587769 | 0.21340017 | 1.3412 | Yes |
| row_246 | THBD      | thrombomodulin                                                     | 2116 | 0.587005 | 0.21383858 | 1.2800 | Yes |
| row_247 | GTF2B     | general transcription factor IIB                                   | 2130 | 0.585273 | 0.21393555 | 1.2651 | Yes |
| row_248 | SHOC2     | soc-2 (suppressor of clear) homolog (C. elegans)                   | 2147 | 0.583510 | 0.2138849  | 1.4750 | Yes |
| row_249 | LAP3      | leucine aminopeptidase 3                                           | 2149 | 0.583161 | 0.21456091 | 1.3026 | Yes |
| row_250 | REST      | RE1-silencing transcription factor                                 | 2166 | 0.581161 | 0.21450736 | 1.3818 | Yes |
| row_251 | ASPH      | aspartate-beta-hydroxylase                                         | 2174 | 0.580410 | 0.2148891  | 1.3342 | Yes |
| row_252 | VLDLR     | very low density lipoprotein receptor                              | 2177 | 0.579954 | 0.21551263 | 1.3200 | Yes |
| row_253 | CSNK1E    | casein kinase 1, epsilon                                           | 2191 | 0.578040 | 0.21560061 | 1.2614 | Yes |
| row_254 | GJA1      | gap junction membrane channel protein alpha 1                      | 2193 | 0.577784 | 0.21626993 | 1.3093 | Yes |
| row_255 | MYLK      | myosin, light polypeptide kinase                                   | 2199 | 0.577367 | 0.21674484 | 1.2611 | Yes |
| row_256 | TM9SF2    | transmembrane 9 superfamily member 2                               | 2203 | 0.576680 | 0.21731584 | 1.2741 | Yes |
| row_257 | ABCC5     | ATP-binding cassette, sub-family C (CFTR/MRP), member 5            | 2217 | 0.575020 | 0.21740006 | 1.2599 | Yes |
| row_258 | TPM3      | tropomyosin 3, gamma                                               | 2225 | 0.573601 | 0.21777336 | 1.2646 | Yes |
| row_259 | PHKA1     | phosphorylase kinase alpha 1                                       | 2232 | 0.572868 | 0.2181942  | 1.2772 | Yes |
| row_260 | GOPC      | golgi associated PDZ and coiled-coil motif containing              | 2242 | 0.571955 | 0.21846852 | 1.4113 | Yes |
| row_261 | MYCT1     | myc target 1                                                       | 2276 | 0.566803 | 0.21757312 | 1.2557 | Yes |
| row_262 | SPIN      | spindlin                                                           | 2286 | 0.565957 | 0.21783997 | 1.3766 | Yes |
| row_263 | GABARAPL2 | gamma-aminobutyric acid (GABA-A) receptor-associated prot          | 2297 | 0.564843 | 0.21805696 | 1.2547 | Yes |
| row_264 | LMAN1     | lectin, mannose-binding, 1                                         | 2300 | 0.564284 | 0.21866104 | 1.2544 | Yes |

|         |          |                                                                  |      |          |            |        |     |
|---------|----------|------------------------------------------------------------------|------|----------|------------|--------|-----|
| row_265 | CNTN1    | contactin 1                                                      | 2309 | 0.563269 | 0.21897303 | 1.3179 | Yes |
| row_266 | TGFB1    | transforming growth factor, beta 1                               | 2370 | 0.555825 | 0.21675529 | 1.2501 | Yes |
| row_267 | KDEL1    | KDEL (Lys-Asp-Glu-Leu) containing 1                              | 2377 | 0.555137 | 0.2171541  | 1.4576 | Yes |
| row_268 | TMOD3    | tropomodulin 3                                                   | 2385 | 0.554422 | 0.21750356 | 1.3037 | Yes |
| row_269 | NFYA     | nuclear transcription factor-Y alpha                             | 2389 | 0.553507 | 0.21804579 | 1.2756 | Yes |
| row_270 | ARL6IP2  | ADP-ribosylation factor-like 6 interacting protein 2             | 2394 | 0.553057 | 0.21853895 | 1.2487 | Yes |
| row_271 | TIPARP   | TCDD-inducible poly(ADP-ribose) polymerase                       | 2395 | 0.552846 | 0.21922576 | 1.2486 | Yes |
| row_272 | LOX      | lysyl oxidase                                                    | 2407 | 0.551701 | 0.21937796 | 1.2481 | Yes |
| row_273 | PAFAH1B2 | platelet-activating factor acetylhydrolase, isoform 1b, alpha2 s | 2409 | 0.551493 | 0.22001462 | 1.3164 | Yes |
| row_274 | PAFAH1B1 | platelet-activating factor acetylhydrolase, isoform 1b, beta1 su | 2418 | 0.550898 | 0.22031122 | 1.2476 | Yes |
| row_275 | LCP2     | lymphocyte cytosolic protein 2                                   | 2425 | 0.550306 | 0.22070405 | 1.2473 | Yes |
| row_276 | TOX      | thymocyte selection-associated HMG box gene                      | 2442 | 0.547705 | 0.22060893 | 1.2941 | Yes |
| row_277 | CDADC1   | cytidine and dCMP deaminase domain containing 1                  | 2451 | 0.546319 | 0.22089987 | 1.4179 | Yes |
| row_278 | APLP2    | amyloid beta (A4) precursor-like protein 2                       | 2456 | 0.545751 | 0.22138396 | 1.2694 | Yes |
| row_279 | TBL1X    | transducin (beta)-like 1 X-linked                                | 2457 | 0.545734 | 0.22206193 | 1.3953 | Yes |
| row_280 | BCL3     | B-cell leukemia/lymphoma 3                                       | 2459 | 0.545555 | 0.22269121 | 1.2449 | Yes |
| row_281 | PPP1R2   | protein phosphatase 1, regulatory (inhibitor) subunit 2          | 2461 | 0.545271 | 0.22332013 | 1.2448 | Yes |
| row_282 | HSD17B12 | hydroxysteroid (17-beta) dehydrogenase 12                        | 2471 | 0.544521 | 0.22356035 | 1.2946 | Yes |
| row_283 | CCNI     | cyclin I                                                         | 2476 | 0.543631 | 0.22404182 | 1.3021 | Yes |
| row_284 | NFYA     | nuclear transcription factor-Y alpha                             | 2478 | 0.543552 | 0.2246686  | 1.3241 | Yes |
| row_285 | NME7     | non-metastatic cells 7, protein expressed in                     | 2511 | 0.539237 | 0.22378744 | 1.4427 | Yes |
| row_286 | USP9X    | ubiquitin specific peptidase 9, X chromosome                     | 2519 | 0.537941 | 0.22411643 | 1.2955 | Yes |
| row_287 | SLAMF1   | signaling lymphocytic activation molecule family member 1        | 2526 | 0.536634 | 0.22449227 | 1.2644 | Yes |
| row_288 | SLC23A2  | solute carrier family 23 (nucleobase transporters), member 2     | 2573 | 0.531207 | 0.22292253 | 1.2377 | Yes |
| row_289 | SLC12A2  | solute carrier family 12, member 2                               | 2576 | 0.530950 | 0.22348519 | 1.2376 | Yes |
| row_290 | NRGN     | neurogranin                                                      | 2581 | 0.530559 | 0.22395042 | 1.2374 | Yes |
| row_291 | MAFB     | v-maf musculoaponeurotic fibrosarcoma oncogene family, prc       | 2585 | 0.530376 | 0.2244639  | 1.4194 | Yes |
| row_292 | PPP2R5C  | protein phosphatase 2, regulatory subunit B (B56), gamma isc     | 2610 | 0.527681 | 0.22395614 | 1.2360 | Yes |
| row_293 | NUP62    | nucleoporin 62                                                   | 2613 | 0.527392 | 0.22451438 | 1.2358 | Yes |
| row_294 | DDX10    | DEAD (Asp-Glu-Ala-Asp) box polypeptide 10                        | 2623 | 0.526004 | 0.2247316  | 1.5280 | Yes |
| row_295 | RAC1     | RAS-related C3 botulinum substrate 1                             | 2642 | 0.523802 | 0.22450984 | 1.2340 | Yes |
| row_296 | SPRED1   | sprouty protein with EVH-1 domain 1, related sequence            | 2644 | 0.523659 | 0.22511192 | 1.2340 | Yes |
| row_297 | MYCBP    | c-myc binding protein                                            | 2667 | 0.520855 | 0.22469261 | 1.2884 | Yes |
| row_298 | COTL1    | coactosin-like 1 (Dictyostelium)                                 | 2687 | 0.519061 | 0.22441651 | 1.2317 | Yes |
| row_299 | GJA1     | gap junction membrane channel protein alpha 1                    | 2694 | 0.518613 | 0.22476995 | 1.2983 | Yes |
| row_300 | CUL3     | cullin 3                                                         | 2701 | 0.517670 | 0.22512223 | 1.2310 | Yes |
| row_301 | SEPW1    | selenoprotein W, muscle 1                                        | 2705 | 0.517304 | 0.22561947 | 1.2308 | Yes |
| row_302 | SCML4    | sex comb on midleg-like 4 (Drosophila)                           | 2716 | 0.515984 | 0.22577576 | 1.2677 | Yes |
| row_303 | MCL1     | myeloid cell leukemia sequence 1                                 | 2746 | 0.513206 | 0.22500767 | 1.3885 | Yes |
| row_304 | PVR      | poliovirus receptor                                              | 2754 | 0.512128 | 0.22530459 | 1.2308 | Yes |
| row_305 | CLCA2    | chloride channel calcium activated 2                             | 2761 | 0.511479 | 0.22564918 | 1.2279 | Yes |
| row_306 | ITGB1    | integrin beta 1 (fibronectin receptor beta)                      | 2763 | 0.511108 | 0.22623566 | 1.2633 | Yes |
| row_307 | MAP1LC3B | microtubule-associated protein 1 light chain 3 beta              | 2765 | 0.510977 | 0.22682197 | 1.2277 | Yes |
| row_308 | ITGAV    | integrin alpha V                                                 | 2781 | 0.509736 | 0.22672816 | 1.2270 | Yes |
| row_309 | HS3ST1   | heparan sulfate (glucosamine) 3-O-sulfotransferase 1             | 2796 | 0.507850 | 0.22668047 | 1.3757 | Yes |
| row_310 | SCAMP1   | secretory carrier membrane protein 1                             | 2798 | 0.507682 | 0.2272627  | 1.2260 | Yes |
| row_311 | RPN2     | ribophorin II                                                    | 2801 | 0.507483 | 0.22779621 | 1.2259 | Yes |



|         |          |                                                               |      |          |            |        |     |
|---------|----------|---------------------------------------------------------------|------|----------|------------|--------|-----|
| row_312 | SRR      | serine racemase                                               | 2802 | 0.507282 | 0.2284264  | 1.2294 | Yes |
| row_313 | HS6ST1   | heparan sulfate 6-O-sulfotransferase 1                        | 2807 | 0.506792 | 0.2288621  | 1.2256 | Yes |
| row_314 | RUNX1    | runt related transcription factor 1                           | 2836 | 0.504251 | 0.22813137 | 1.2243 | Yes |
| row_315 | PTPRK    | protein tyrosine phosphatase, receptor type, K                | 2837 | 0.504139 | 0.22875765 | 1.2659 | Yes |
| row_316 | MYLK     | myosin, light polypeptide kinase                              | 2840 | 0.504053 | 0.2292869  | 1.2663 | Yes |
| row_317 | PPM1A    | protein phosphatase 1A, magnesium dependent, alpha isoform    | 2843 | 0.503936 | 0.229816   | 1.4484 | Yes |
| row_318 | TOX      | thymocyte selection-associated HMG box gene                   | 2852 | 0.503018 | 0.23005313 | 1.3910 | Yes |
| row_319 | BTBD14A  | BTB (POZ) domain containing 14A                               | 2856 | 0.502475 | 0.23053195 | 1.2234 | Yes |
| row_320 | LEPROTL1 | leptin receptor overlapping transcript-like 1                 | 2863 | 0.501516 | 0.23086415 | 1.2230 | Yes |
| row_321 | PHKA1    | phosphorylase kinase alpha 1                                  | 2867 | 0.500964 | 0.2313411  | 1.3583 | Yes |
| row_322 | PVR      | poliovirus receptor                                           | 2877 | 0.500457 | 0.23152657 | 1.2248 | Yes |
| row_323 | GADD45A  | growth arrest and DNA-damage-inducible 45 alpha               | 2881 | 0.500042 | 0.23200236 | 1.3010 | Yes |
| row_324 | SERTAD2  | SERTA domain containing 2                                     | 2884 | 0.499658 | 0.23252615 | 1.2221 | Yes |
| row_325 | PCDH7    | protocadherin 7                                               | 2897 | 0.498428 | 0.2325637  | 1.4848 | Yes |
| row_326 | UBQLN1   | ubiquilin 1                                                   | 2903 | 0.497912 | 0.2329399  | 1.2278 | Yes |
| row_327 | GNPNAT1  | glucosamine-phosphate N-acetyltransferase 1                   | 2906 | 0.497757 | 0.23346134 | 1.2368 | Yes |
| row_328 | ASB4     | ankyrin repeat and SOCS box-containing protein 4              | 2914 | 0.497191 | 0.23373969 | 1.5318 | Yes |
| row_329 | KIF1B    | kinesin family member 1B                                      | 2930 | 0.494887 | 0.23362744 | 1.4935 | Yes |
| row_330 | ASPH     | aspartate-beta-hydroxylase                                    | 2935 | 0.494453 | 0.23404782 | 1.2195 | Yes |
| row_331 | LEPROTL1 | leptin receptor overlapping transcript-like 1                 | 2944 | 0.492790 | 0.23427224 | 1.2187 | Yes |
| row_332 | SRF      | serum response factor                                         | 2955 | 0.492259 | 0.23439907 | 1.2514 | Yes |
| row_333 | RAP1B    | RAS related protein 1b                                        | 2956 | 0.492060 | 0.23501036 | 1.2183 | Yes |
| row_334 | SNRPD3   | Small nuclear ribonucleoprotein D3                            | 2961 | 0.491496 | 0.23542705 | 1.2908 | Yes |
| row_335 | ARHGAP5  | Rho GTPase activating protein 5                               | 2964 | 0.491210 | 0.23594035 | 1.2733 | Yes |
| row_336 | RAD21    | RAD21 homolog (S. pombe)                                      | 2968 | 0.490755 | 0.2364046  | 1.2177 | Yes |
| row_337 | GCNT2    | glucosaminyl (N-acetyl) transferase 2, I-branching enzyme     | 2976 | 0.490288 | 0.23667438 | 1.4659 | Yes |
| row_338 | CTSC     | cathepsin C                                                   | 2985 | 0.489753 | 0.23689504 | 1.2172 | Yes |
| row_339 | SGPP1    | sphingosine-1-phosphate phosphatase 1                         | 2992 | 0.489067 | 0.2372118  | 1.6146 | Yes |
| row_340 | DNAJC3   | DnaJ (Hsp40) homolog, subfamily C, member 3                   | 3036 | 0.485546 | 0.23573074 | 1.2151 | Yes |
| row_341 | NDN      | necdin                                                        | 3041 | 0.485055 | 0.23613945 | 1.2221 | Yes |
| row_342 | PIP5K2A  | Phosphatidylinositol-4-phosphate 5-kinase, type II, alpha     | 3047 | 0.484490 | 0.23649898 | 1.2146 | Yes |
| row_343 | ATP8A1   | ATPase, aminophospholipid transporter (APLT), class I, type I | 3063 | 0.483383 | 0.23637243 | 1.3341 | Yes |
| row_344 | MAP2K3   | mitogen activated protein kinase kinase 3                     | 3073 | 0.482289 | 0.23653534 | 1.3180 | Yes |
| row_345 | PUM1     | pumilio 1 (Drosophila)                                        | 3086 | 0.480996 | 0.23655123 | 1.3854 | Yes |
| row_346 | TRIM37   | tripartite motif protein 37                                   | 3116 | 0.478448 | 0.23573995 | 1.2116 | Yes |
| row_347 | DDX3Y    | DEAD (Asp-Glu-Ala-Asp) box polypeptide 3, Y-linked            | 3131 | 0.476683 | 0.23565355 | 1.2207 | Yes |
| row_348 | TCERG1   | transcription elongation regulator 1 (CA150)                  | 3136 | 0.475940 | 0.23605092 | 1.2408 | Yes |
| row_349 | TPP2     | tripeptidyl peptidase II                                      | 3140 | 0.475408 | 0.2364961  | 1.2101 | Yes |
| row_350 | COPB2    | coatamer protein complex, subunit beta 2 (beta prime)         | 3157 | 0.474457 | 0.23631    | 1.2097 | Yes |
| row_351 | ARHGAP5  | Rho GTPase activating protein 5                               | 3158 | 0.474404 | 0.23689935 | 1.2097 | Yes |
| row_352 | MTMR1    | myotubularin related protein 1                                | 3163 | 0.473959 | 0.23729427 | 1.2235 | Yes |
| row_353 | MAP2K3   | mitogen activated protein kinase kinase 3                     | 3166 | 0.473562 | 0.23778564 | 1.2092 | Yes |
| row_354 | SLCO3A1  | solute carrier organic anion transporter family, member 3a1   | 3170 | 0.473459 | 0.2382284  | 1.2105 | Yes |
| row_355 | CRK      | v-crk sarcoma virus CT10 oncogene homolog (avian)             | 3172 | 0.473276 | 0.23876788 | 1.2091 | Yes |
| row_356 | NDN      | necdin                                                        | 3177 | 0.472867 | 0.23916145 | 1.4435 | Yes |
| row_357 | PFTK1    | PFTAIRE protein kinase 1                                      | 3178 | 0.472810 | 0.23974882 | 1.2461 | Yes |
| row_358 | TLOC1    | translocation protein 1                                       | 3213 | 0.469485 | 0.23868406 | 1.2073 | Yes |

|         |         |                                                                |      |          |            |        |     |
|---------|---------|----------------------------------------------------------------|------|----------|------------|--------|-----|
| row_359 | DDX50   | DEAD (Asp-Glu-Ala-Asp) box polypeptide 50                      | 3214 | 0.469433 | 0.23926723 | 1.2383 | Yes |
| row_360 | GHR     | growth hormone receptor                                        | 3224 | 0.468869 | 0.23941347 | 1.4442 | Yes |
| row_361 | RNGTT   | RNA guanylyltransferase and 5'-phosphatase                     | 3230 | 0.467799 | 0.23975226 | 1.2422 | Yes |
| row_362 | MYCBP   | c-myc binding protein                                          | 3259 | 0.464517 | 0.23897216 | 1.2161 | Yes |
| row_363 | NCAM1   | neural cell adhesion molecule 1                                | 3277 | 0.462706 | 0.23872297 | 1.2275 | Yes |
| row_364 | NEDD4   | neural precursor cell expressed, developmentally down-regul    | 3279 | 0.462658 | 0.23924926 | 1.2039 | Yes |
| row_365 | TARS    | threonyl-tRNA synthetase                                       | 3287 | 0.462183 | 0.23948413 | 1.2037 | Yes |
| row_366 | TRIM2   | tripartite motif protein 2                                     | 3314 | 0.459952 | 0.2387953  | 1.2026 | Yes |
| row_367 | CTSB    | cathepsin B                                                    | 3337 | 0.458274 | 0.23829825 | 1.2730 | Yes |
| row_368 | ZDHHC5  | zinc finger, DHHC domain containing 5                          | 3357 | 0.456705 | 0.23794468 | 1.2417 | Yes |
| row_369 | SEN2    | SUMO/sentrin specific peptidase 2                              | 3370 | 0.455757 | 0.23792921 | 1.2558 | Yes |
| row_370 | ABHD5   | abhydrolase domain containing 5                                | 3373 | 0.455414 | 0.23839803 | 1.2004 | Yes |
| row_371 | OSTF1   | osteoclast stimulating factor 1                                | 3375 | 0.455085 | 0.23891492 | 1.2003 | Yes |
| row_372 | KDEL1   | KDEL (Lys-Asp-Glu-Leu) containing 1                            | 3400 | 0.452901 | 0.23831426 | 1.1992 | Yes |
| row_373 | BAZ1B   | bromodomain adjacent to zinc finger domain, 1B                 | 3401 | 0.452740 | 0.2388767  | 1.1991 | Yes |
| row_374 | RGS18   | regulator of G-protein signaling 18                            | 3444 | 0.450113 | 0.2374001  | 1.1979 | Yes |
| row_375 | GJA1    | gap junction membrane channel protein alpha 1                  | 3451 | 0.449615 | 0.23766784 | 1.1976 | Yes |
| row_376 | NCAM1   | neural cell adhesion molecule 1                                | 3458 | 0.449315 | 0.2379352  | 1.1988 | Yes |
| row_377 | PLXNC1  | plexin C1                                                      | 3460 | 0.449265 | 0.23844485 | 1.2542 | Yes |
| row_378 | PURB    | Purine rich element binding protein B                          | 3480 | 0.447812 | 0.23808023 | 1.2131 | Yes |
| row_379 | CHUK    | conserved helix-loop-helix ubiquitous kinase                   | 3494 | 0.446532 | 0.23800483 | 1.2666 | Yes |
| row_380 | MAP2K4  | mitogen activated protein kinase kinase 4                      | 3502 | 0.446107 | 0.23821974 | 1.3139 | Yes |
| row_381 | COPS2   | COP9 (constitutive photomorphogenic) homolog, subunit 2 (A     | 3507 | 0.445698 | 0.23857954 | 1.1957 | Yes |
| row_382 | TBC1D15 | TBC1 domain family, member 15                                  | 3528 | 0.443738 | 0.23816139 | 1.1948 | Yes |
| row_383 | PIP5K1A | phosphatidylinositol-4-phosphate 5-kinase, type 1 alpha        | 3529 | 0.443695 | 0.2387126  | 1.2265 | Yes |
| row_384 | MYCBP   | c-myc binding protein                                          | 3532 | 0.443510 | 0.23916662 | 1.1947 | Yes |
| row_385 | SLC12A2 | solute carrier family 12, member 2                             | 3551 | 0.442067 | 0.23884334 | 1.1940 | Yes |
| row_386 | PPM1B   | protein phosphatase 1B, magnesium dependent, beta isoform      | 3554 | 0.441667 | 0.23929508 | 1.2492 | Yes |
| row_387 | KIF5B   | kinesin family member 5B                                       | 3555 | 0.441488 | 0.23984353 | 1.2151 | Yes |
| row_388 | PPP2R2A | protein phosphatase 2 (formerly 2A), regulatory subunit B (PR  | 3558 | 0.441202 | 0.2402947  | 1.2314 | Yes |
| row_389 | EIF3S10 | eukaryotic translation initiation factor 3, subunit 10 (theta) | 3569 | 0.440461 | 0.24035718 | 1.3184 | Yes |
| row_390 | RUSC1   | RUN and SH3 domain containing 1                                | 3586 | 0.439326 | 0.24012741 | 1.1927 | Yes |
| row_391 | MIPOL1  | mirror-image polydactyly gene 1 homolog (human)                | 3592 | 0.438527 | 0.24042985 | 1.2038 | Yes |
| row_392 | EIF5    | eukaryotic translation initiation factor 5                     | 3602 | 0.437679 | 0.24053735 | 1.1919 | Yes |
| row_393 | PURB    | purine rich element binding protein B                          | 3604 | 0.437509 | 0.24103239 | 1.1918 | Yes |
| row_394 | KHDRBS1 | KH domain containing, RNA binding, signal transduction asso    | 3610 | 0.436953 | 0.24133286 | 1.2592 | Yes |
| row_395 | IL27RA  | interleukin 27 receptor, alpha                                 | 3611 | 0.436897 | 0.24187562 | 1.1915 | Yes |
| row_396 | CD151   | CD151 antigen                                                  | 3617 | 0.436008 | 0.24217492 | 1.2483 | Yes |
| row_397 | ADAM9   | a disintegrin and metallopeptidase domain 9 (meltrin gamma)    | 3649 | 0.432157 | 0.2412092  | 1.1892 | No  |
| row_398 | STAG2   | stromal antigen 2                                              | 3683 | 0.429755 | 0.24014355 | 1.2819 | No  |
| row_399 | WDR12   | WD repeat domain 12                                            | 3696 | 0.428815 | 0.24009462 | 1.1876 | No  |
| row_400 | BCL10   | B-cell leukemia/lymphoma 10                                    | 3697 | 0.428799 | 0.24062732 | 1.2081 | No  |
| row_401 | CCT2    | chaperonin subunit 2 (beta)                                    | 3702 | 0.428452 | 0.24096571 | 1.1874 | No  |
| row_402 | BET1    | blocked early in transport 1 homolog (S. cerevisiae)           | 3716 | 0.427536 | 0.2408667  | 1.1870 | No  |
| row_403 | USP9X   | ubiquitin specific peptidase 9, X chromosome                   | 3761 | 0.424055 | 0.23926081 | 1.3955 | No  |
| row_404 | EIF3S10 | eukaryotic translation initiation factor 3, subunit 10 (theta) | 3770 | 0.422997 | 0.23939852 | 1.1848 | No  |
| row_405 | RANBP9  | RAN binding protein 9                                          | 3790 | 0.421092 | 0.23900071 | 1.2202 | No  |

|         |          |                                                                  |      |          |            |        |    |
|---------|----------|------------------------------------------------------------------|------|----------|------------|--------|----|
| row_406 | SRPRB    | signal recognition particle receptor, B subunit                  | 3808 | 0.419823 | 0.23869826 | 1.1833 | No |
| row_407 | ZFX      | zinc finger protein X-linked                                     | 3816 | 0.419289 | 0.23887984 | 1.1842 | No |
| row_408 | TCEB1    | transcription elongation factor B (SIII), polypeptide 1          | 3841 | 0.417131 | 0.23823474 | 1.1820 | No |
| row_409 | SNAP23   | synaptosomal-associated protein 23                               | 3851 | 0.416614 | 0.23831607 | 1.1916 | No |
| row_410 | STAU2    | staufen (RNA binding protein) homolog 2 (Drosophila)             | 3866 | 0.415595 | 0.23815377 | 1.2487 | No |
| row_411 | UBE2L3   | ubiquitin-conjugating enzyme E2L 3                               | 3874 | 0.415232 | 0.23833032 | 1.1811 | No |
| row_412 | MYNN     | myoneurin                                                        | 3882 | 0.414717 | 0.23850623 | 1.1809 | No |
| row_413 | HERPUD1  | homocysteine-inducible, endoplasmic reticulum stress-inducib     | 3919 | 0.411823 | 0.23727289 | 1.1795 | No |
| row_414 | PAFAH1B2 | platelet-activating factor acetylhydrolase, isoform 1b, alpha2 s | 3925 | 0.411308 | 0.23754151 | 1.2527 | No |
| row_415 | EIF4A1   | eukaryotic translation initiation factor 4A1                     | 3932 | 0.410939 | 0.2377612  | 1.2643 | No |
| row_416 | DNAJB6   | DnaJ (Hsp40) homolog, subfamily B, member 6                      | 3933 | 0.410900 | 0.23827165 | 1.1881 | No |
| row_417 | CLTB     | clathrin, light polypeptide (Lcb)                                | 3946 | 0.410020 | 0.23819938 | 1.1787 | No |
| row_418 | COPS2    | COP9 (constitutive photomorphogenic) homolog, subunit 2 (A       | 3949 | 0.409784 | 0.2386115  | 1.1785 | No |
| row_419 | TTC3     | tetratricopeptide repeat domain 3                                | 3959 | 0.408708 | 0.23868302 | 1.3309 | No |
| row_420 | RAD18    | RAD18 homolog (S. cerevisiae)                                    | 4001 | 0.406162 | 0.23720029 | 1.2027 | No |
| row_421 | ITGB2    | integrin beta 2                                                  | 4018 | 0.404631 | 0.23692743 | 1.2393 | No |
| row_422 | ARF4     | ADP-ribosylation factor 4                                        | 4053 | 0.402351 | 0.23577927 | 1.1960 | No |
| row_423 | SLC15A4  | solute carrier family 15, member 4                               | 4058 | 0.402003 | 0.23608479 | 1.1749 | No |
| row_424 | CASP12   | caspase 12                                                       | 4083 | 0.400026 | 0.23541845 | 1.2931 | No |
| row_425 | BZW1     | basic leucine zipper and W2 domains 1                            | 4102 | 0.399289 | 0.235042   | 1.2824 | No |
| row_426 | NSF      | N-ethylmaleimide sensitive fusion protein                        | 4117 | 0.398599 | 0.2348586  | 1.1733 | No |
| row_427 | CRNKL1   | Crn, crooked neck-like 1 (Drosophila)                            | 4118 | 0.398581 | 0.23535375 | 1.2884 | No |
| row_428 | PECR     | peroxisomal trans-2-enoyl-CoA reductase                          | 4142 | 0.396990 | 0.2347321  | 1.2713 | No |
| row_429 | BCL10    | B-cell leukemia/lymphoma 10                                      | 4144 | 0.396859 | 0.23517667 | 1.1973 | No |
| row_430 | PLOD2    | procollagen lysine, 2-oxoglutarate 5-dioxygenase 2               | 4160 | 0.395627 | 0.2349411  | 1.2487 | No |
| row_431 | SPTLC1   | serine palmitoyltransferase, long chain base subunit 1           | 4176 | 0.394404 | 0.234704   | 1.1980 | No |
| row_432 | TRIM32   | tripartite motif protein 32                                      | 4182 | 0.394049 | 0.23495117 | 1.1711 | No |
| row_433 | ETV3     | ets variant gene 3                                               | 4191 | 0.393652 | 0.23505244 | 1.1838 | No |
| row_434 | SRRM1    | serine/arginine repetitive matrix 1                              | 4193 | 0.393181 | 0.23549242 | 1.1707 | No |
| row_435 | ARL2BP   | ADP-ribosylation factor-like 2 binding protein                   | 4212 | 0.392287 | 0.23510729 | 1.1703 | No |
| row_436 | SS18     | synovial sarcoma translocation, Chromosome 18                    | 4213 | 0.392227 | 0.23559456 | 1.1702 | No |
| row_437 | PSAT1    | phosphoserine aminotransferase 1                                 | 4220 | 0.391721 | 0.23579036 | 1.1700 | No |
| row_438 | OPRS1    | opioid receptor, sigma 1                                         | 4247 | 0.389482 | 0.23501398 | 1.1690 | No |
| row_439 | DDX46    | DEAD (Asp-Glu-Ala-Asp) box polypeptide 46                        | 4255 | 0.388966 | 0.23515789 | 1.1687 | No |
| row_440 | KPNA1    | karyopherin (importin) alpha 1                                   | 4256 | 0.388949 | 0.23564109 | 1.1687 | No |
| row_441 | CSNK1D   | casein kinase 1, delta                                           | 4279 | 0.386651 | 0.23505507 | 1.2197 | No |
| row_442 | HRB      | HIV-1 Rev binding protein                                        | 4289 | 0.385419 | 0.23509763 | 1.2037 | No |
| row_443 | MEF2C    | myocyte enhancer factor 2C                                       | 4290 | 0.385315 | 0.23557632 | 1.1679 | No |
| row_444 | DNAJC3   | DnaJ (Hsp40) homolog, subfamily C, member 3                      | 4309 | 0.384097 | 0.235181   | 1.2147 | No |
| row_445 | KIT      | kit oncogene                                                     | 4347 | 0.381050 | 0.23386097 | 1.2596 | No |
| row_446 | NCOA6IP  | nuclear receptor coactivator 6 interacting protein               | 4363 | 0.379050 | 0.2336048  | 1.2835 | No |
| row_447 | IL1RAP   | interleukin 1 receptor accessory protein                         | 4365 | 0.378997 | 0.23402716 | 1.1640 | No |
| row_448 | GRSF1    | G-rich RNA sequence binding factor 1                             | 4372 | 0.378539 | 0.2342066  | 1.1638 | No |
| row_449 | ADD3     | adducin 3 (gamma)                                                | 4374 | 0.378332 | 0.23462813 | 1.2097 | No |
| row_450 | MSH2     | mutS homolog 2 (E. coli)                                         | 4386 | 0.377650 | 0.23456411 | 1.1634 | No |
| row_451 | MLLT3    | myeloid/lymphoid or mixed lineage-leukemia translocation to      | 4395 | 0.376844 | 0.23464449 | 1.3204 | No |
| row_452 | SFRS10   | splicing factor, arginine/serine-rich 10 (transformer 2 homolog  | 4400 | 0.376545 | 0.2349184  | 1.1629 | No |

|         |         |                                                                |      |          |            |        |    |
|---------|---------|----------------------------------------------------------------|------|----------|------------|--------|----|
| row_453 | API5    | apoptosis inhibitor 5                                          | 4409 | 0.375882 | 0.23499759 | 1.1680 | No |
| row_454 | MOAP1   | modulator of apoptosis 1                                       | 4421 | 0.374453 | 0.23492959 | 1.2204 | No |
| row_455 | PIK3R1  | phosphatidylinositol 3-kinase, regulatory subunit, polypeptide | 4459 | 0.372099 | 0.23359844 | 1.1608 | No |
| row_456 | ZDHHC5  | zinc finger, DHHC domain containing 5                          | 4465 | 0.371167 | 0.23381719 | 1.1604 | No |
| row_457 | FBNP1   | formin binding protein 1                                       | 4466 | 0.371143 | 0.23427826 | 1.1604 | No |
| row_458 | TCERG1  | transcription elongation regulator 1 (CA150)                   | 4475 | 0.370646 | 0.23435095 | 1.1965 | No |
| row_459 | RAC1    | RAS-related C3 botulinum substrate 1                           | 4494 | 0.369534 | 0.23393755 | 1.1596 | No |
| row_460 | CFLAR   | CASP8 and FADD-like apoptosis regulator                        | 4496 | 0.369406 | 0.23434798 | 1.1596 | No |
| row_461 | RAB14   | RAB14, member RAS oncogene family                              | 4507 | 0.368964 | 0.23432164 | 1.2624 | No |
| row_462 | KCTD5   | potassium channel tetramerisation domain containing 5          | 4510 | 0.368614 | 0.23468263 | 1.1614 | No |
| row_463 | ATF2    | activating transcription factor 2                              | 4532 | 0.367217 | 0.23412094 | 1.2258 | No |
| row_464 | ATP2C1  | ATPase, Ca++-sequestering                                      | 4538 | 0.366990 | 0.2343345  | 1.1584 | No |
| row_465 | TGFBI   | transforming growth factor, beta induced                       | 4564 | 0.365392 | 0.23357666 | 1.2338 | No |
| row_466 | DNAJA2  | DnaJ (Hsp40) homolog, subfamily A, member 2                    | 4572 | 0.364548 | 0.23369025 | 1.2813 | No |
| row_467 | BTBD14A | BTB (POZ) domain containing 14A                                | 4579 | 0.364135 | 0.23385178 | 1.1624 | No |
| row_468 | YWHAQ   | tyrosine 3-monooxygenase/tryptophan 5-monooxygenase acti       | 4601 | 0.362180 | 0.23328383 | 1.1562 | No |
| row_469 | PLEKHC1 | pleckstrin homology domain containing, family C (with FERM)    | 4605 | 0.361837 | 0.23358794 | 1.1560 | No |
| row_470 | F2R     | coagulation factor II (thrombin) receptor                      | 4615 | 0.361145 | 0.23360035 | 1.2925 | No |
| row_471 | NBR1    | neighbor of Brca1 gene 1                                       | 4632 | 0.360142 | 0.23327222 | 1.1552 | No |
| row_472 | NDN     | neccdin                                                        | 4668 | 0.357873 | 0.23202033 | 1.2952 | No |
| row_473 | SMARCE1 | SWI/SNF related, matrix associated, actin dependent regulat    | 4695 | 0.355891 | 0.23120221 | 1.1533 | No |
| row_474 | HBLD2   | HESB like domain containing 2                                  | 4700 | 0.355792 | 0.23145033 | 1.1532 | No |
| row_475 | ABCC1   | ATP-binding cassette, sub-family C (CFTR/MRP), member 1        | 4713 | 0.354969 | 0.23130967 | 1.1528 | No |
| row_476 | LMAN1   | lectin, mannose-binding, 1                                     | 4729 | 0.354115 | 0.23102252 | 1.3807 | No |
| row_477 | KIF1B   | kinesin family member 1B                                       | 4738 | 0.353477 | 0.23107389 | 1.1521 | No |
| row_478 | E2F6    | E2F transcription factor 6                                     | 4742 | 0.353051 | 0.23136707 | 1.1519 | No |
| row_479 | APLP2   | amyloid beta (A4) precursor-like protein 2                     | 4748 | 0.352639 | 0.2315628  | 1.1673 | No |
| row_480 | PSMD1   | proteasome (prosome, macropain) 26S subunit, non-ATPase,       | 4760 | 0.351537 | 0.23146634 | 1.1512 | No |
| row_481 | SNAP23  | synaptosomal-associated protein 23                             | 4770 | 0.350912 | 0.23146604 | 1.2029 | No |
| row_482 | SMARCA2 | SWI/SNF related, matrix associated, actin dependent regulat    | 4777 | 0.350571 | 0.23161073 | 1.2737 | No |
| row_483 | PIP5K2A | phosphatidylinositol-4-phosphate 5-kinase, type II, alpha      | 4785 | 0.349965 | 0.23170619 | 1.1505 | No |
| row_484 | REST    | RE1-silencing transcription factor                             | 4811 | 0.348304 | 0.23092712 | 1.1709 | No |
| row_485 | WDR1    | WD repeat domain 1                                             | 4814 | 0.347989 | 0.23126249 | 1.4198 | No |
| row_486 | SNRPD3  | small nuclear ribonucleoprotein D3                             | 4831 | 0.346996 | 0.23091803 | 1.1545 | No |
| row_487 | PIK3R1  | phosphatidylinositol 3-kinase, regulatory subunit, polypeptide | 4835 | 0.346751 | 0.23120339 | 1.2159 | No |
| row_488 | APLP2   | amyloid beta (A4) precursor-like protein 2                     | 4837 | 0.346522 | 0.2315854  | 1.1546 | No |
| row_489 | RSU1    | Ras suppressor protein 1                                       | 4863 | 0.345136 | 0.2308024  | 1.1483 | No |
| row_490 | RNF103  | ring finger protein 103                                        | 4868 | 0.344636 | 0.23103665 | 1.1481 | No |
| row_491 | PTDSS1  | Phosphatidylserine synthase 1                                  | 4881 | 0.343800 | 0.23088211 | 1.1477 | No |
| row_492 | FBXW2   | F-box and WD-40 domain protein 2                               | 4901 | 0.342668 | 0.23038687 | 1.1472 | No |
| row_493 | TIMP3   | tissue inhibitor of metalloproteinase 3                        | 4905 | 0.342387 | 0.2306668  | 1.1470 | No |
| row_494 | TMOD3   | tropomodulin 3                                                 | 4916 | 0.341689 | 0.23060657 | 1.1831 | No |
| row_495 | CEACAM1 | CEA-related cell adhesion molecule 1                           | 4919 | 0.341443 | 0.2309338  | 1.1743 | No |
| row_496 | HS2ST1  | Heparan sulfate 2-O-sulfotransferase 1                         | 4932 | 0.340740 | 0.23077546 | 1.1463 | No |
| row_497 | PSME3   | proteasome (prosome, macropain) 28 subunit, 3                  | 4937 | 0.340344 | 0.23100439 | 1.1671 | No |
| row_498 | MEF2C   | myocyte enhancer factor 2C                                     | 4952 | 0.339741 | 0.23074785 | 1.2156 | No |
| row_499 | CSDA    | cold shock domain protein A                                    | 4955 | 0.339572 | 0.23107277 | 1.1457 | No |

|         |          |                                                                          |      |          |            |        |    |
|---------|----------|--------------------------------------------------------------------------|------|----------|------------|--------|----|
| row_500 | SFMBT1   | Scm-like with four mbt domains 1                                         | 4958 | 0.339375 | 0.23139744 | 1.1456 | No |
| row_501 | USP9X    | ubiquitin specific peptidase 9, X chromosome                             | 4974 | 0.338550 | 0.23109095 | 1.1453 | No |
| row_502 | TXNRD1   | thioredoxin reductase 1                                                  | 4975 | 0.338455 | 0.23151141 | 1.1775 | No |
| row_503 | EIF3S6   | Eukaryotic translation initiation factor 3, subunit 6                    | 4976 | 0.338423 | 0.23193184 | 1.1452 | No |
| row_504 | RDX      | radixin                                                                  | 4979 | 0.338075 | 0.2322549  | 1.1450 | No |
| row_505 | VLDLR    | very low density lipoprotein receptor                                    | 4982 | 0.337913 | 0.23257774 | 1.1953 | No |
| row_506 | NUPL1    | nucleoporin like 1                                                       | 4992 | 0.337066 | 0.23256023 | 1.2116 | No |
| row_507 | NDN      | neccdin                                                                  | 5036 | 0.334582 | 0.23089164 | 1.1434 | No |
| row_508 | ATP2C1   | ATPase, Ca <sup>++</sup> -sequestering                                   | 5069 | 0.332682 | 0.22975388 | 1.1426 | No |
| row_509 | SNX9     | sorting nexin 9                                                          | 5072 | 0.332584 | 0.2300701  | 1.1546 | No |
| row_510 | MMP14    | matrix metalloproteinase 14 (membrane-inserted)                          | 5073 | 0.332497 | 0.23048316 | 1.1425 | No |
| row_511 | SENP6    | SUMO/sentrin specific peptidase 6                                        | 5083 | 0.332091 | 0.23045948 | 1.1448 | No |
| row_512 | PUM2     | pumilio 2 (Drosophila)                                                   | 5091 | 0.331653 | 0.2305322  | 1.3635 | No |
| row_513 | PTP4A1   | protein tyrosine phosphatase 4a1                                         | 5118 | 0.330553 | 0.22968261 | 1.1416 | No |
| row_514 | PPAT     | phosphoribosyl pyrophosphate amidotransferase                            | 5121 | 0.330304 | 0.22999601 | 1.1825 | No |
| row_515 | SORBS1   | sorbin and SH3 domain containing 1                                       | 5134 | 0.329686 | 0.22982393 | 1.1412 | No |
| row_516 | PA2G4    | proliferation-associated 2G4                                             | 5146 | 0.329064 | 0.22969955 | 1.1414 | No |
| row_517 | NOLC1    | nucleolar and coiled-body phosphoprotein 1                               | 5157 | 0.328554 | 0.229623   | 1.1442 | No |
| row_518 | METAP1   | methionyl aminopeptidase 1                                               | 5162 | 0.328344 | 0.22983702 | 1.1406 | No |
| row_519 | PSMD11   | proteasome (prosome, macropain) 26S subunit, non-ATPase,                 | 5164 | 0.328277 | 0.23019637 | 1.2705 | No |
| row_520 | ETF1     | eukaryotic translation termination factor 1                              | 5167 | 0.327877 | 0.23050675 | 1.2712 | No |
| row_521 | ARL6IP1  | ADP-ribosylation factor-like 6 interacting protein 1                     | 5175 | 0.327491 | 0.2305743  | 1.1402 | No |
| row_522 | AMFR     | autocrine motility factor receptor                                       | 5184 | 0.327197 | 0.23059301 | 1.1400 | No |
| row_523 | SDC4     | syndecan 4                                                               | 5189 | 0.326967 | 0.23080532 | 1.1817 | No |
| row_524 | RAB18    | RAB18, member RAS oncogene family                                        | 5213 | 0.325450 | 0.2300948  | 1.1392 | No |
| row_525 | OPRS1    | opioid receptor, sigma 1                                                 | 5221 | 0.324944 | 0.23015918 | 1.1390 | No |
| row_526 | UBXD4    | UBX domain containing 4                                                  | 5224 | 0.324875 | 0.23046583 | 1.1410 | No |
| row_527 | RASSF3   | Ras association (RalGDS/AF-6) domain family 3                            | 5232 | 0.324287 | 0.2305294  | 1.1387 | No |
| row_528 | SLC25A17 | solute carrier family 25 (mitochondrial carrier, peroxisomal me          | 5240 | 0.323967 | 0.23059258 | 1.1386 | No |
| row_529 | GOLPH4   | golgi phosphoprotein 4                                                   | 5243 | 0.323812 | 0.2308979  | 1.1385 | No |
| row_530 | ATP1B3   | ATPase, Na <sup>+</sup> /K <sup>+</sup> transporting, beta 3 polypeptide | 5249 | 0.323568 | 0.23105752 | 1.1384 | No |
| row_531 | ANXA4    | annexin A4                                                               | 5261 | 0.322593 | 0.2309251  | 1.1379 | No |
| row_532 | COTL1    | coactosin-like 1 (Dictyostelium)                                         | 5288 | 0.321325 | 0.23006405 | 1.1374 | No |
| row_533 | PDCD6IP  | programmed cell death 6 interacting protein                              | 5296 | 0.320947 | 0.23012346 | 1.2551 | No |
| row_534 | CHN2     | chimerin (chimaerin) 2                                                   | 5302 | 0.320626 | 0.23027942 | 1.1410 | No |
| row_535 | HRB      | HIV-1 Rev binding protein                                                | 5329 | 0.319155 | 0.22941567 | 1.1364 | No |
| row_536 | UBE2L3   | ubiquitin-conjugating enzyme E2L 3                                       | 5383 | 0.315927 | 0.22723919 | 1.1349 | No |
| row_537 | GNB1     | guanine nucleotide binding protein, beta 1                               | 5392 | 0.315515 | 0.2272434  | 1.1347 | No |
| row_538 | GNAI3    | guanine nucleotide binding protein, alpha inhibiting 3                   | 5429 | 0.313234 | 0.22588758 | 1.1337 | No |
| row_539 | PLEKHB2  | pleckstrin homology domain containing, family B (evectins) m             | 5431 | 0.313091 | 0.22622806 | 1.1357 | No |
| row_540 | TRPC1    | transient receptor potential cation channel, subfamily C, meml           | 5450 | 0.312211 | 0.22574346 | 1.1466 | No |
| row_541 | NOLC1    | nucleolar and coiled-body phosphoprotein 1                               | 5456 | 0.312077 | 0.22588879 | 1.1480 | No |
| row_542 | IMMT     | inner membrane protein, mitochondrial                                    | 5471 | 0.311206 | 0.22559682 | 1.2242 | No |
| row_543 | MPP5     | membrane protein, palmitoylated 5 (MAGUK p55 subfamily m                 | 5483 | 0.310428 | 0.22544928 | 1.1604 | No |
| row_544 | ZFP36    | zinc finger protein 36                                                   | 5499 | 0.308952 | 0.22510603 | 1.2593 | No |
| row_545 | PIP5K2A  | phosphatidylinositol-4-phosphate 5-kinase, type II, alpha                | 5500 | 0.308945 | 0.22548984 | 1.1317 | No |
| row_546 | RAP2C    | RAP2C, member of RAS oncogene family                                     | 5507 | 0.308696 | 0.2255825  | 1.1316 | No |

|         |          |                                                                |      |          |            |        |    |
|---------|----------|----------------------------------------------------------------|------|----------|------------|--------|----|
| row_547 | MAP1LC3B | Microtubule-associated protein 1 light chain 3 beta            | 5508 | 0.308691 | 0.22596599 | 1.2692 | No |
| row_548 | ABCC5    | ATP-binding cassette, sub-family C (CFTR/MRP), member 5        | 5540 | 0.306908 | 0.22484466 | 1.1530 | No |
| row_549 | TXNDC4   | thioredoxin domain containing 4 (endoplasmic reticulum)        | 5541 | 0.306893 | 0.22522593 | 1.1480 | No |
| row_550 | RALA     | v-ral simian leukemia viral oncogene homolog A (ras related)   | 5554 | 0.306330 | 0.22502483 | 1.1305 | No |
| row_551 | TOB2     | transducer of ERBB2, 2                                         | 5555 | 0.306320 | 0.22540537 | 1.1305 | No |
| row_552 | ARHGAP6  | Rho GTPase activating protein 6                                | 5556 | 0.306319 | 0.22578591 | 1.1447 | No |
| row_553 | PARN     | poly(A)-specific ribonuclease (deadenylation nuclease)         | 5558 | 0.306232 | 0.22611788 | 1.1305 | No |
| row_554 | ATP5F1   | ATP synthase, H+ transporting, mitochondrial F0 complex, su    | 5574 | 0.305485 | 0.22577031 | 1.1301 | No |
| row_555 | KDR      | kinase insert domain protein receptor                          | 5582 | 0.305295 | 0.22581029 | 1.1301 | No |
| row_556 | GJA1     | gap junction membrane channel protein alpha 1                  | 5597 | 0.304402 | 0.22550987 | 1.1752 | No |
| row_557 | EGLN3    | EGL nine homolog 3 (C. elegans)                                | 5609 | 0.303982 | 0.22535431 | 1.1295 | No |
| row_558 | SOCS3    | suppressor of cytokine signaling 3                             | 5616 | 0.303744 | 0.22544083 | 1.2632 | No |
| row_559 | TRIM37   | tripartite motif protein 37                                    | 5664 | 0.301073 | 0.22353673 | 1.2218 | No |
| row_560 | IFRD1    | interferon-related developmental regulator 1                   | 5680 | 0.299847 | 0.22318217 | 1.1355 | No |
| row_561 | ATF2     | activating transcription factor 2                              | 5695 | 0.298808 | 0.22287479 | 1.1321 | No |
| row_562 | SDC2     | syndecan 2                                                     | 5701 | 0.298575 | 0.22300336 | 1.1732 | No |
| row_563 | DNMT3A   | DNA methyltransferase 3A                                       | 5709 | 0.298307 | 0.22303465 | 1.1269 | No |
| row_564 | CCT8     | chaperonin subunit 8 (theta)                                   | 5714 | 0.298021 | 0.223211   | 1.1336 | No |
| row_565 | TIMP3    | tissue inhibitor of metalloproteinase 3                        | 5715 | 0.297939 | 0.22358114 | 1.2467 | No |
| row_566 | GTPBP4   | GTP binding protein 4                                          | 5766 | 0.295418 | 0.2215246  | 1.1514 | No |
| row_567 | NFE2L2   | nuclear factor, erythroid derived 2, like 2                    | 5768 | 0.295331 | 0.22184302 | 1.1255 | No |
| row_568 | PIP5K2A  | Phosphatidylinositol-4-phosphate 5-kinase, type II, alpha      | 5778 | 0.294733 | 0.22177292 | 1.1253 | No |
| row_569 | PBX1     | pre B-cell leukemia transcription factor 1                     | 5812 | 0.293286 | 0.22053774 | 1.2158 | No |
| row_570 | PSME4    | proteasome (prosome, macropain) activator subunit 4            | 5822 | 0.292882 | 0.22046535 | 1.1763 | No |
| row_571 | SOS1     | Son of sevenless homolog 1 (Drosophila)                        | 5837 | 0.292088 | 0.22014962 | 1.1579 | No |
| row_572 | KPNA3    | karyopherin (importin) alpha 3                                 | 5840 | 0.291949 | 0.22041537 | 1.1240 | No |
| row_573 | WSB2     | WD repeat and SOCS box-containing 2                            | 5852 | 0.291378 | 0.22024417 | 1.1274 | No |
| row_574 | CCT7     | chaperonin subunit 7 (eta)                                     | 5863 | 0.290688 | 0.22012058 | 1.1235 | No |
| row_575 | ACVR1    | activin A receptor, type 1                                     | 5866 | 0.290586 | 0.22038464 | 1.1234 | No |
| row_576 | ANKRD17  | ankyrin repeat domain 17                                       | 5878 | 0.289880 | 0.22021158 | 1.1231 | No |
| row_577 | RCN2     | reticulocalbin 2                                               | 5891 | 0.289262 | 0.21998928 | 1.1228 | No |
| row_578 | MTAC2D1  | membrane targeting (tandem) C2 domain containing 1             | 5895 | 0.289045 | 0.22020295 | 1.1227 | No |
| row_579 | NCAM1    | neural cell adhesion molecule 1                                | 5897 | 0.288937 | 0.22051343 | 1.2141 | No |
| row_580 | PDCD6IP  | programmed cell death 6 interacting protein                    | 5944 | 0.286289 | 0.21863943 | 1.1215 | No |
| row_581 | CD47     | CD47 antigen (Rh-related antigen, integrin-associated signal t | 5954 | 0.285734 | 0.21855816 | 1.1992 | No |
| row_582 | MYLK     | myosin, light polypeptide kinase                               | 5962 | 0.285178 | 0.21857314 | 1.1210 | No |
| row_583 | VAMP3    | vesicle-associated membrane protein 3                          | 5974 | 0.284632 | 0.21839356 | 1.1870 | No |
| row_584 | FBXW2    | F-box and WD-40 domain protein 2                               | 5976 | 0.284475 | 0.2186985  | 1.1301 | No |
| row_585 | PRKCA    | protein kinase C, alpha                                        | 5977 | 0.284474 | 0.2190519  | 1.1238 | No |
| row_586 | SRR      | serine racemase                                                | 5983 | 0.284067 | 0.21916245 | 1.1205 | No |
| row_587 | CREM     | cAMP responsive element modulator                              | 5987 | 0.283869 | 0.21936968 | 1.1509 | No |
| row_588 | TLOC1    | translocation protein 1                                        | 5989 | 0.283656 | 0.2196736  | 1.1203 | No |
| row_589 | PITPNB   | phosphatidylinositol transfer protein, beta                    | 6002 | 0.282641 | 0.21944307 | 1.1198 | No |
| row_590 | HNRPAB   | heterogeneous nuclear ribonucleoprotein A/B                    | 6041 | 0.280585 | 0.21794976 | 1.1491 | No |
| row_591 | ABHD5    | abhydrolase domain containing 5                                | 6043 | 0.280450 | 0.2182497  | 1.1188 | No |
| row_592 | HK2      | hexokinase 2                                                   | 6049 | 0.280207 | 0.21835543 | 1.1194 | No |
| row_593 | ROCK1    | Rho-associated coiled-coil forming kinase 1                    | 6052 | 0.280081 | 0.21860644 | 1.1898 | No |

|         |          |                                                                  |      |          |            |        |    |
|---------|----------|------------------------------------------------------------------|------|----------|------------|--------|----|
| row_594 | WSB2     | WD repeat and SOCS box-containing 2                              | 6062 | 0.279690 | 0.21851766 | 1.1185 | No |
| row_595 | EIF4A1   | eukaryotic translation initiation factor 4A1                     | 6096 | 0.277679 | 0.21726309 | 1.1195 | No |
| row_596 | EIF2S2   | eukaryotic translation initiation factor 2, subunit 2 (beta)     | 6108 | 0.277157 | 0.21707423 | 1.1174 | No |
| row_597 | RGS18    | regulator of G-protein signaling 18                              | 6120 | 0.276558 | 0.21688461 | 1.1171 | No |
| row_598 | HMGB1    | high mobility group box 1                                        | 6128 | 0.276068 | 0.21688828 | 1.1169 | No |
| row_599 | CD28     | CD28 antigen                                                     | 6131 | 0.276005 | 0.21713422 | 1.1661 | No |
| row_600 | CLTB     | clathrin, light polypeptide (Lcb)                                | 6149 | 0.275158 | 0.21665205 | 1.1236 | No |
| row_601 | PTK2B    | PTK2 protein tyrosine kinase 2 beta                              | 6152 | 0.275080 | 0.21689683 | 1.1164 | No |
| row_602 | PVR      | poliovirus receptor                                              | 6156 | 0.274938 | 0.21709298 | 1.1164 | No |
| row_603 | MINPP1   | multiple inositol polyphosphate histidine phosphatase 1          | 6166 | 0.274239 | 0.21699743 | 1.1161 | No |
| row_604 | NDN      | necdin                                                           | 6169 | 0.274027 | 0.21724091 | 1.1777 | No |
| row_605 | CRK      | v-crk sarcoma virus CT10 oncogene homolog (avian)                | 6174 | 0.273806 | 0.21738718 | 1.1254 | No |
| row_606 | PAFAH1B2 | platelet-activating factor acetylhydrolase, isoform 1b, alpha2 s | 6176 | 0.273693 | 0.21767873 | 1.1158 | No |
| row_607 | RNF141   | ring finger protein 141                                          | 6184 | 0.273304 | 0.21767895 | 1.1288 | No |
| row_608 | ENPP4    | ectonucleotide pyrophosphatase/phosphodiesterase 4               | 6186 | 0.273222 | 0.21796991 | 1.1156 | No |
| row_609 | FKBP1A   | FK506 binding protein 1a                                         | 6199 | 0.272221 | 0.21772644 | 1.1152 | No |
| row_610 | GPIAP1   | GPI-anchored membrane protein 1                                  | 6213 | 0.271157 | 0.21743317 | 1.1748 | No |
| row_611 | DYRK1A   | dual-specificity tyrosine-(Y)-phosphorylation regulated kinase   | 6220 | 0.270852 | 0.21747883 | 1.1398 | No |
| row_612 | ARHGAP6  | Rho GTPase activating protein 6                                  | 6223 | 0.270727 | 0.21771821 | 1.1145 | No |
| row_613 | TSN      | translin                                                         | 6255 | 0.268920 | 0.2165497  | 1.1137 | No |
| row_614 | PPP2R5C  | Protein phosphatase 2, regulatory subunit B (B56), gamma iso     | 6263 | 0.268542 | 0.21654402 | 1.1135 | No |
| row_615 | TIMP3    | tissue inhibitor of metalloproteinase 3                          | 6272 | 0.268075 | 0.21648929 | 1.2439 | No |
| row_616 | CD151    | CD151 antigen                                                    | 6278 | 0.267754 | 0.21657956 | 1.1132 | No |
| row_617 | UGCG     | UDP-glucose ceramide glucosyltransferase                         | 6279 | 0.267727 | 0.21691215 | 1.1308 | No |
| row_618 | HMMR     | hyaluronan mediated motility receptor (RHAMM)                    | 6302 | 0.266662 | 0.21617708 | 1.1127 | No |
| row_619 | ARL6     | ADP-ribosylation factor-like 6                                   | 6322 | 0.265834 | 0.21558638 | 1.1123 | No |
| row_620 | UBE2D2   | ubiquitin-conjugating enzyme E2D 2                               | 6327 | 0.265464 | 0.21572228 | 1.1121 | No |
| row_621 | ABCC5    | ATP-binding cassette, sub-family C (CFTR/MRP), member 5          | 6328 | 0.265454 | 0.21605206 | 1.1121 | No |
| row_622 | MAPK1    | mitogen activated protein kinase 1                               | 6343 | 0.264473 | 0.21570203 | 1.1117 | No |
| row_623 | YME1L1   | YME1-like 1 (S. cerevisiae)                                      | 6349 | 0.264035 | 0.21578768 | 1.1153 | No |
| row_624 | DECR1    | 2,4-dienoyl CoA reductase 1, mitochondrial                       | 6365 | 0.263144 | 0.21538752 | 1.1111 | No |
| row_625 | FBXW2    | F-box and WD-40 domain protein 2                                 | 6386 | 0.262239 | 0.21474388 | 1.1929 | No |
| row_626 | EIF3S10  | eukaryotic translation initiation factor 3, subunit 10 (theta)   | 6408 | 0.261323 | 0.21405065 | 1.1103 | No |
| row_627 | ARF1     | ADP-ribosylation factor 1                                        | 6420 | 0.261041 | 0.21384175 | 1.1591 | No |
| row_628 | ITGB1    | integrin beta 1 (fibronectin receptor beta)                      | 6439 | 0.260289 | 0.21329264 | 1.1098 | No |
| row_629 | CLIC4    | chloride intracellular channel 4 (mitochondrial)                 | 6455 | 0.259547 | 0.21288802 | 1.1095 | No |
| row_630 | DYRK1A   | dual-specificity tyrosine-(Y)-phosphorylation regulated kinase   | 6467 | 0.259089 | 0.2126767  | 1.1093 | No |
| row_631 | QSCN6    | quiescin Q6                                                      | 6470 | 0.259065 | 0.2129016  | 1.1170 | No |
| row_632 | ACP1     | acid phosphatase 1, soluble                                      | 6471 | 0.259043 | 0.21322341 | 1.1093 | No |
| row_633 | UXS1     | UDP-glucuronate decarboxylase 1                                  | 6472 | 0.259006 | 0.21354517 | 1.1093 | No |
| row_634 | CLTC     | clathrin, heavy chain (Hc)                                       | 6490 | 0.258556 | 0.21304238 | 1.1091 | No |
| row_635 | TCEB1    | transcription elongation factor B (SIII), polypeptide 1          | 6495 | 0.258290 | 0.21316937 | 1.1089 | No |
| row_636 | RAB7     | RAB7, member RAS oncogene family                                 | 6506 | 0.257677 | 0.21300477 | 1.1087 | No |
| row_637 | NUSAP1   | nucleolar and spindle associated protein 1                       | 6510 | 0.257413 | 0.21317914 | 1.1288 | No |
| row_638 | IL10     | interleukin 10                                                   | 6517 | 0.257013 | 0.2132076  | 1.1084 | No |
| row_639 | FIGNL1   | fidgetin-like 1                                                  | 6524 | 0.256765 | 0.21323577 | 1.1083 | No |
| row_640 | PIP5K1C  | phosphatidylinositol-4-phosphate 5-kinase, type 1 gamma          | 6532 | 0.256383 | 0.21321498 | 1.1081 | No |

|         |          |                                                                  |      |          |            |        |    |
|---------|----------|------------------------------------------------------------------|------|----------|------------|--------|----|
| row_641 | CASP12   | caspase 12                                                       | 6544 | 0.255588 | 0.21299931 | 1.1482 | No |
| row_642 | FHL2     | four and a half LIM domains 2                                    | 6572 | 0.254353 | 0.21200658 | 1.1072 | No |
| row_643 | RTN4     | reticulon 4                                                      | 6589 | 0.253577 | 0.21154608 | 1.1219 | No |
| row_644 | SLC39A6  | solute carrier family 39 (metal ion transporter), member 6       | 6603 | 0.252870 | 0.21112301 | 1.1065 | No |
| row_645 | ITGAV    | integrin alpha V                                                 | 6604 | 0.252798 | 0.21154414 | 1.1065 | No |
| row_646 | PPP2R1A  | protein phosphatase 2 (formerly 2A), regulatory subunit A (PR    | 6607 | 0.252772 | 0.21176122 | 1.1065 | No |
| row_647 | DNAJA2   | DnaJ (Hsp40) homolog, subfamily A, member 2                      | 6610 | 0.252647 | 0.21197815 | 1.1079 | No |
| row_648 | SLC25A15 | solute carrier family 25 (mitochondrial carrier ornithine transp | 6616 | 0.252263 | 0.21204919 | 1.1063 | No |
| row_649 | RUNX1    | runt related transcription factor 1                              | 6647 | 0.250728 | 0.21090654 | 1.2044 | No |
| row_650 | RANBP9   | RAN binding protein 9                                            | 6667 | 0.249442 | 0.21029548 | 1.1050 | No |
| row_651 | CEBPB    | CCAAT/enhancer binding protein (C/EBP), beta                     | 6669 | 0.249321 | 0.21055673 | 1.1050 | No |
| row_652 | PJA2     | praja 2, RING-H2 motif containing                                | 6692 | 0.248694 | 0.20979933 | 1.1324 | No |
| row_653 | PLSCR2   | phospholipid scramblase 2                                        | 6693 | 0.248605 | 0.21010818 | 1.1757 | No |
| row_654 | PARN     | poly(A)-specific ribonuclease (deadenylation nuclease)           | 6698 | 0.248311 | 0.21022277 | 1.1045 | No |
| row_655 | RUSC1    | RUN and SH3 domain containing 1                                  | 6706 | 0.247737 | 0.21019123 | 1.1043 | No |
| row_656 | RUNX1    | runt related transcription factor 1                              | 6716 | 0.247378 | 0.21006233 | 1.1340 | No |
| row_657 | MEF2C    | myocyte enhancer factor 2C                                       | 6724 | 0.246827 | 0.21002966 | 1.1039 | No |
| row_658 | PPAT     | phosphoribosyl pyrophosphate amidotransferase                    | 6729 | 0.246487 | 0.21014199 | 1.1261 | No |
| row_659 | FBL      | fibrillarin                                                      | 6736 | 0.246175 | 0.21015699 | 1.1036 | No |
| row_660 | LITAF    | LPS-induced TN factor                                            | 6744 | 0.245804 | 0.21012306 | 1.1034 | No |
| row_661 | JAK1     | Janus kinase 1                                                   | 6745 | 0.245796 | 0.2104284  | 1.1043 | No |
| row_662 | CFLAR    | CASP8 and FADD-like apoptosis regulator                          | 6752 | 0.245307 | 0.21044233 | 1.1903 | No |
| row_663 | ETF1     | eukaryotic translation termination factor 1                      | 6759 | 0.244939 | 0.21045579 | 1.1201 | No |
| row_664 | FYB      | FYN binding protein                                              | 6785 | 0.243843 | 0.20954695 | 1.1025 | No |
| row_665 | SEC63    | SEC63-like (S. cerevisiae)                                       | 6825 | 0.242547 | 0.20795791 | 1.1086 | No |
| row_666 | WAC      | WW domain containing adaptor with coiled-coil                    | 6828 | 0.242323 | 0.20816201 | 1.1019 | No |
| row_667 | MSN      | moesin                                                           | 6858 | 0.241054 | 0.20705582 | 1.1815 | No |
| row_668 | KPNA3    | karyopherin (importin) alpha 3                                   | 6861 | 0.240953 | 0.20725821 | 1.1566 | No |
| row_669 | IMMT     | inner membrane protein, mitochondrial                            | 6873 | 0.240293 | 0.20702355 | 1.1010 | No |
| row_670 | ELMO2    | engulfment and cell motility 2, ced-12 homolog (C. elegans)      | 6875 | 0.240249 | 0.20727354 | 1.1010 | No |
| row_671 | SMARCE1  | SWI/SNF related, matrix associated, actin dependent regulatc     | 6901 | 0.239189 | 0.20635892 | 1.1005 | No |
| row_672 | NCAM1    | neural cell adhesion molecule 1                                  | 6904 | 0.239114 | 0.20655903 | 1.1004 | No |
| row_673 | SENP2    | SUMO/sentrin specific peptidase 2                                | 6905 | 0.239111 | 0.20685607 | 1.1004 | No |
| row_674 | NPM1     | Nucleophosmin 1                                                  | 6939 | 0.237282 | 0.20555131 | 1.0996 | No |
| row_675 | RRAGC    | Ras-related GTP binding C                                        | 6952 | 0.236627 | 0.20526363 | 1.0994 | No |
| row_676 | HIF1A    | hypoxia inducible factor 1, alpha subunit                        | 6958 | 0.236386 | 0.20531493 | 1.1652 | No |
| row_677 | VLDLR    | very low density lipoprotein receptor                            | 6960 | 0.236372 | 0.20556012 | 1.1099 | No |
| row_678 | SH3D19   | SH3 domain protein D19                                           | 6993 | 0.235093 | 0.2043011  | 1.0987 | No |
| row_679 | ANKRD17  | ankyrin repeat domain 17                                         | 7004 | 0.234675 | 0.20410794 | 1.0985 | No |
| row_680 | NUPL1    | nucleoporin like 1                                               | 7005 | 0.234565 | 0.20439933 | 1.2167 | No |
| row_681 | CSNK1D   | casein kinase 1, delta                                           | 7019 | 0.234002 | 0.20405991 | 1.0982 | No |
| row_682 | CDC5L    | cell division cycle 5-like (S. pombe)                            | 7034 | 0.233527 | 0.20367144 | 1.0980 | No |
| row_683 | COTL1    | coactosin-like 1 (Dictyostelium)                                 | 7035 | 0.233464 | 0.20396148 | 1.0980 | No |
| row_684 | ZFX      | zinc finger protein X-linked                                     | 7045 | 0.232902 | 0.20381457 | 1.1259 | No |
| row_685 | MTAC2D1  | membrane targeting (tandem) C2 domain containing 1               | 7067 | 0.232140 | 0.20308506 | 1.0974 | No |
| row_686 | ATP1A1   | ATPase, Na+/K+ transporting, alpha 1 polypeptide                 | 7084 | 0.231449 | 0.20259707 | 1.0971 | No |
| row_687 | HMMR     | hyaluronan mediated motility receptor (RHAMM)                    | 7093 | 0.231033 | 0.20249632 | 1.0969 | No |



|         |           |                                                              |      |          |            |        |    |
|---------|-----------|--------------------------------------------------------------|------|----------|------------|--------|----|
| row_688 | PLRG1     | pleiotropic regulator 1, PRL1 homolog (Arabidopsis)          | 7104 | 0.230707 | 0.20229822 | 1.0967 | No |
| row_689 | LATS2     | large tumor suppressor 2                                     | 7106 | 0.230641 | 0.20253627 | 1.1324 | No |
| row_690 | PFN2      | profilin 2                                                   | 7118 | 0.230153 | 0.20228902 | 1.1661 | No |
| row_691 | DSG2      | desmoglein 2                                                 | 7136 | 0.229218 | 0.20174977 | 1.0961 | No |
| row_692 | TPP2      | tripeptidyl peptidase II                                     | 7143 | 0.228764 | 0.20174314 | 1.1257 | No |
| row_693 | PTGS2     | prostaglandin-endoperoxide synthase 2                        | 7144 | 0.228755 | 0.20202732 | 1.0959 | No |
| row_694 | TTC3      | tetratricopeptide repeat domain 3                            | 7154 | 0.228346 | 0.20187476 | 1.1500 | No |
| row_695 | DDX46     | DEAD (Asp-Glu-Ala-Asp) box polypeptide 46                    | 7175 | 0.227523 | 0.2011188  | 1.1493 | No |
| row_696 | ICAM1     | intercellular adhesion molecule                              | 7176 | 0.227487 | 0.2014706  | 1.0953 | No |
| row_697 | YWHAG     | 3-monooxygenase/tryptophan 5-monooxygenase activation pr     | 7188 | 0.227081 | 0.20121953 | 1.1209 | No |
| row_698 | RIOK2     | RIO kinase 2 (yeast)                                         | 7197 | 0.226647 | 0.20111333 | 1.0965 | No |
| row_699 | RABGEF1   | RAB guanine nucleotide exchange factor (GEF) 1               | 7201 | 0.226452 | 0.20124924 | 1.0949 | No |
| row_700 | LGALS9    | lectin, galactose binding, soluble 9                         | 7203 | 0.226302 | 0.20148191 | 1.0948 | No |
| row_701 | NR1D2     | nuclear receptor subfamily 1, group D, member 2              | 7243 | 0.223672 | 0.19986941 | 1.0937 | No |
| row_702 | PTDSS1    | phosphatidylserine synthase 1                                | 7247 | 0.223479 | 0.20000163 | 1.0936 | No |
| row_703 | GCNT2     | glucosaminyl (N-acetyl) transferase 2, I-branching enzyme    | 7276 | 0.222669 | 0.19892107 | 1.1555 | No |
| row_704 | HNRPL     | heterogeneous nuclear ribonucleoprotein L                    | 7297 | 0.221997 | 0.19822744 | 1.1107 | No |
| row_705 | DSG2      | Desmoglein 2                                                 | 7333 | 0.220406 | 0.19680478 | 1.1497 | No |
| row_706 | AP3S2     | adaptor-related protein complex 3, sigma 2 subunit           | 7403 | 0.217973 | 0.19373108 | 1.0936 | No |
| row_707 | ELF1      | E74-like factor 1                                            | 7410 | 0.217639 | 0.19371063 | 1.0910 | No |
| row_708 | DNMT3A    | DNA methyltransferase 3A                                     | 7414 | 0.217444 | 0.19383535 | 1.0945 | No |
| row_709 | ARF6      | ADP-ribosylation factor 6                                    | 7416 | 0.217311 | 0.19405684 | 1.1420 | No |
| row_710 | EPS8      | epidermal growth factor receptor pathway substrate 8         | 7429 | 0.216570 | 0.19374424 | 1.1050 | No |
| row_711 | FRG1      | FSHD region gene 1                                           | 7440 | 0.215730 | 0.19352753 | 1.0902 | No |
| row_712 | LMAN2     | lectin, mannose-binding 2                                    | 7460 | 0.214824 | 0.19287346 | 1.0898 | No |
| row_713 | CD151     | CD151 antigen                                                | 7481 | 0.214146 | 0.19217008 | 1.1266 | No |
| row_714 | GLA       | galactosidase, alpha                                         | 7494 | 0.213717 | 0.19185394 | 1.1179 | No |
| row_715 | SIAH2     | seven in absentia 2                                          | 7507 | 0.213200 | 0.19153716 | 1.1345 | No |
| row_716 | FBL       | fibrillarlin                                                 | 7509 | 0.213119 | 0.19175343 | 1.0890 | No |
| row_717 | PSEN1     | presenilin 1                                                 | 7541 | 0.211588 | 0.1905137  | 1.1354 | No |
| row_718 | GABARAPL1 | gamma-aminobutyric acid (GABA(A)) receptor-associated pro    | 7542 | 0.211546 | 0.19077651 | 1.0884 | No |
| row_719 | PSEN1     | presenilin 1                                                 | 7588 | 0.209258 | 0.18885529 | 1.0874 | No |
| row_720 | PHKA1     | phosphorylase kinase alpha 1                                 | 7617 | 0.208065 | 0.18775658 | 1.1925 | No |
| row_721 | ATP5A1    | ATP synthase, H+ transporting, mitochondrial F1 complex, al  | 7627 | 0.207684 | 0.18757835 | 1.0867 | No |
| row_722 | KLHDC2    | kelch domain containing 2                                    | 7652 | 0.206561 | 0.18667166 | 1.0862 | No |
| row_723 | MGEA5     | meningioma expressed antigen 5 (hyaluronidase)               | 7675 | 0.205373 | 0.18586044 | 1.0857 | No |
| row_724 | GHR       | growth hormone receptor                                      | 7680 | 0.205334 | 0.18592165 | 1.0857 | No |
| row_725 | SOCS3     | suppressor of cytokine signaling 3                           | 7684 | 0.205275 | 0.18603125 | 1.1319 | No |
| row_726 | PAPOLA    | poly (A) polymerase alpha                                    | 7717 | 0.203886 | 0.18473348 | 1.1130 | No |
| row_727 | MAP2K7    | mitogen activated protein kinase kinase 7                    | 7748 | 0.202417 | 0.18353081 | 1.0844 | No |
| row_728 | NAB1      | Ngfi-A binding protein 1                                     | 7750 | 0.202358 | 0.18373373 | 1.0844 | No |
| row_729 | ACVR1     | activin A receptor, type 1                                   | 7759 | 0.201876 | 0.18359676 | 1.0841 | No |
| row_730 | PYGL      | liver glycogen phosphorylase                                 | 7781 | 0.200871 | 0.18282841 | 1.0837 | No |
| row_731 | DSG2      | desmoglein 2                                                 | 7784 | 0.200837 | 0.18298097 | 1.1112 | No |
| row_732 | DDR1      | discoidin domain receptor family, member 1                   | 7837 | 0.198446 | 0.18070702 | 1.0827 | No |
| row_733 | GRINL1A   | glutamate receptor, ionotropic, N-methyl D-aspartate-like 1A | 7850 | 0.197853 | 0.18037117 | 1.0824 | No |
| row_734 | WDR1      | WD repeat domain 1                                           | 7868 | 0.197134 | 0.17979206 | 1.0821 | No |

|         |          |                                                                 |      |          |            |        |    |
|---------|----------|-----------------------------------------------------------------|------|----------|------------|--------|----|
| row_735 | ETV3     | ets variant gene 3                                              | 7888 | 0.196058 | 0.17911468 | 1.0914 | No |
| row_736 | METAP1   | methionyl aminopeptidase 1                                      | 7892 | 0.195922 | 0.17921267 | 1.0816 | No |
| row_737 | CNTN1    | contactin 1                                                     | 7911 | 0.195214 | 0.17858271 | 1.0813 | No |
| row_738 | SRPK2    | serine/arginine-rich protein specific kinase 2                  | 7912 | 0.195175 | 0.17882517 | 1.1287 | No |
| row_739 | NDFIP1   | Nedd4 family interacting protein 1                              | 7917 | 0.195058 | 0.17887361 | 1.0837 | No |
| row_740 | ATP1A1   | ATPase, Na+/K+ transporting, alpha 1 polypeptide                | 7959 | 0.193161 | 0.17712627 | 1.0804 | No |
| row_741 | EPS8     | epidermal growth factor receptor pathway substrate 8            | 7965 | 0.193051 | 0.17712376 | 1.0803 | No |
| row_742 | PSME3    | proteasome (prosome, macropain) 28 subunit, 3                   | 7967 | 0.192938 | 0.17731497 | 1.0803 | No |
| row_743 | MYO6     | myosin VI                                                       | 7969 | 0.192881 | 0.17750612 | 1.0802 | No |
| row_744 | TBL1X    | transducin (beta)-like 1 X-linked                               | 7979 | 0.192214 | 0.17730866 | 1.0926 | No |
| row_745 | TGIF     | TG interacting factor                                           | 7993 | 0.191549 | 0.17691651 | 1.0797 | No |
| row_746 | BXDC1    | brix domain containing 1                                        | 7997 | 0.191431 | 0.17700891 | 1.0984 | No |
| row_747 | PPM1B    | protein phosphatase 1B, magnesium dependent, beta isoform       | 7999 | 0.191380 | 0.17719819 | 1.0796 | No |
| row_748 | KLHDC2   | kelch domain containing 2                                       | 8016 | 0.190808 | 0.1766597  | 1.0794 | No |
| row_749 | LPL      | lipoprotein lipase                                              | 8031 | 0.190441 | 0.17621769 | 1.1405 | No |
| row_750 | CFLAR    | CASP8 and FADD-like apoptosis regulator                         | 8034 | 0.190420 | 0.17635731 | 1.1223 | No |
| row_751 | PIP5K2A  | phosphatidylinositol-4-phosphate 5-kinase, type II, alpha       | 8042 | 0.189906 | 0.17625394 | 1.0940 | No |
| row_752 | PTEN     | phosphatase and tensin homolog                                  | 8056 | 0.189092 | 0.17585872 | 1.0786 | No |
| row_753 | CALM2    | calmodulin 2                                                    | 8094 | 0.187396 | 0.17429811 | 1.0855 | No |
| row_754 | SLC25A17 | solute carrier family 25 (mitochondrial carrier, peroxisomal me | 8108 | 0.186382 | 0.17389953 | 1.0774 | No |
| row_755 | GORASP2  | golgi reassembly stacking protein 2                             | 8128 | 0.185520 | 0.17320906 | 1.1246 | No |
| row_756 | FKBP7    | FK506 binding protein 7                                         | 8145 | 0.184828 | 0.17266314 | 1.1153 | No |
| row_757 | CDV3     | carnitine deficiency-associated gene expressed in ventricle 3   | 8167 | 0.183702 | 0.17187347 | 1.0763 | No |
| row_758 | GUCY1B3  | guanylate cyclase 1, soluble, beta 3                            | 8222 | 0.181268 | 0.16948123 | 1.0752 | No |
| row_759 | PTPN2    | protein tyrosine phosphatase, non-receptor type 2               | 8230 | 0.180767 | 0.16936651 | 1.1010 | No |
| row_760 | METAP2   | methionine aminopeptidase 2                                     | 8256 | 0.179409 | 0.16837762 | 1.0744 | No |
| row_761 | RBPSUH   | recombining binding protein suppressor of hairless (Drosophil   | 8269 | 0.178674 | 0.16801794 | 1.0741 | No |
| row_762 | TOB2     | transducer of ERBB2, 2                                          | 8274 | 0.178288 | 0.16804555 | 1.0740 | No |
| row_763 | ARIH1    | ariadne ubiquitin-conjugating enzyme E2 binding protein hom     | 8280 | 0.178168 | 0.16802453 | 1.0739 | No |
| row_764 | AP2M1    | adaptor protein complex AP-2, mu1                               | 8295 | 0.177751 | 0.16756676 | 1.0737 | No |
| row_765 | WDR26    | WD repeat domain 26                                             | 8316 | 0.176687 | 0.16681685 | 1.0867 | No |
| row_766 | CBFB     | core binding factor beta                                        | 8334 | 0.175850 | 0.1662113  | 1.0729 | No |
| row_767 | CSNK2A1  | casein kinase II, alpha 1 polypeptide                           | 8362 | 0.174868 | 0.16511983 | 1.0725 | No |
| row_768 | TPM3     | tropomyosin 3, gamma                                            | 8383 | 0.174027 | 0.1643666  | 1.0721 | No |
| row_769 | TSNAX    | translin-associated factor X                                    | 8390 | 0.173728 | 0.1642916  | 1.0720 | No |
| row_770 | AKAP9    | A kinase (PRKA) anchor protein (yotiao) 9                       | 8449 | 0.171404 | 0.16169325 | 1.0910 | No |
| row_771 | LITAF    | LPS-induced TN factor                                           | 8467 | 0.170723 | 0.16108133 | 1.0707 | No |
| row_772 | TLR4     | toll-like receptor 4                                            | 8476 | 0.170018 | 0.16090478 | 1.0766 | No |
| row_773 | TAC1     | tachykinin, precursor 1 (substance K, substance P, neurokinin   | 8486 | 0.169593 | 0.16067922 | 1.1320 | No |
| row_774 | PRDX1    | peroxiredoxin 1                                                 | 8499 | 0.169273 | 0.16030787 | 1.0701 | No |
| row_775 | USP9X    | ubiquitin specific peptidase 9, X chromosome                    | 8520 | 0.168534 | 0.15954782 | 1.0698 | No |
| row_776 | GJA1     | gap junction membrane channel protein alpha 1                   | 8548 | 0.167476 | 0.15844716 | 1.0693 | No |
| row_777 | STAT4    | signal transducer and activator of transcription 4              | 8582 | 0.166116 | 0.15705399 | 1.0899 | No |
| row_778 | PTN      | pleiotrophin                                                    | 8596 | 0.165621 | 0.15662962 | 1.0685 | No |
| row_779 | TGFBI    | transforming growth factor, beta induced                        | 8602 | 0.165437 | 0.1565928  | 1.0952 | No |
| row_780 | GTPBP4   | GTP binding protein 4                                           | 8613 | 0.165067 | 0.15631315 | 1.0683 | No |
| row_781 | SOS1     | Son of sevenless homolog 1 (Drosophila)                         | 8623 | 0.164708 | 0.15608153 | 1.0681 | No |

|         |         |                                                                |      |          |            |        |    |
|---------|---------|----------------------------------------------------------------|------|----------|------------|--------|----|
| row_782 | FBXW7   | F-box and WD-40 domain protein 7, archipelago homolog (Dr      | 8628 | 0.164467 | 0.15609196 | 1.0680 | No |
| row_783 | CREM    | cAMP responsive element modulator                              | 8648 | 0.163557 | 0.15537421 | 1.0676 | No |
| row_784 | HES1    | hairy and enhancer of split 1 (Drosophila)                     | 8680 | 0.162735 | 0.15407377 | 1.0673 | No |
| row_785 | ADD3    | adducin 3 (gamma)                                              | 8693 | 0.162304 | 0.15369377 | 1.0671 | No |
| row_786 | DYRK1A  | dual-specificity tyrosine-(Y)-phosphorylation regulated kinase | 8702 | 0.162035 | 0.15350729 | 1.1618 | No |
| row_787 | MAP2K7  | mitogen activated protein kinase kinase 7                      | 8723 | 0.161417 | 0.1527384  | 1.0667 | No |
| row_788 | RPL23   | ribosomal protein L23                                          | 8735 | 0.161120 | 0.15240538 | 1.0666 | No |
| row_789 | NUP62   | Nucleoporin 62                                                 | 8741 | 0.161016 | 0.15236306 | 1.0665 | No |
| row_790 | MYNN    | myoneurin                                                      | 8766 | 0.160052 | 0.1513986  | 1.0880 | No |
| row_791 | FADS2   | fatty acid desaturase 2                                        | 8772 | 0.159957 | 0.15135497 | 1.0734 | No |
| row_792 | SEC23B  | SEC23B (S. cerevisiae)                                         | 8782 | 0.159627 | 0.15111703 | 1.0660 | No |
| row_793 | VPS4A   | vacuolar protein sorting 4a (yeast)                            | 8785 | 0.159471 | 0.1512182  | 1.0730 | No |
| row_794 | SLC30A5 | solute carrier family 30 (zinc transporter), member 5          | 8820 | 0.157503 | 0.14976586 | 1.0823 | No |
| row_795 | TKT     | transketolase                                                  | 8833 | 0.157194 | 0.14937949 | 1.0649 | No |
| row_796 | PDCD6IP | Programmed cell death 6 interacting protein                    | 8837 | 0.157008 | 0.14942913 | 1.0648 | No |
| row_797 | PSME3   | Proteasome (prosome, macropain) 28 subunit, 3                  | 8843 | 0.156861 | 0.14938165 | 1.0648 | No |
| row_798 | HDLBP   | high density lipoprotein (HDL) binding protein                 | 8859 | 0.156328 | 0.14884879 | 1.0667 | No |
| row_799 | JAM2    | junction adhesion molecule 2                                   | 8871 | 0.155631 | 0.14850895 | 1.0643 | No |
| row_800 | RAB2    | RAB2, member RAS oncogene family                               | 8875 | 0.155376 | 0.14855658 | 1.0641 | No |
| row_801 | GCNT2   | Glucosaminyl (N-acetyl) transferase 2, l-branching enzyme      | 8882 | 0.155017 | 0.14845832 | 1.0640 | No |
| row_802 | PPP2R2A | protein phosphatase 2 (formerly 2A), regulatory subunit B (PR  | 8892 | 0.154634 | 0.14821419 | 1.0638 | No |
| row_803 | ASH1L   | ash1 (absent, small, or homeotic)-like (Drosophila)            | 8897 | 0.154572 | 0.14821233 | 1.0638 | No |
| row_804 | KLHL13  | kelch-like 13 (Drosophila)                                     | 8898 | 0.154551 | 0.14840433 | 1.1959 | No |
| row_805 | RAB18   | RAB18, member RAS oncogene family                              | 8923 | 0.153596 | 0.14743184 | 1.0952 | No |
| row_806 | SOAT1   | sterol O-acyltransferase 1                                     | 8941 | 0.152805 | 0.14679767 | 1.0668 | No |
| row_807 | TRPC1   | transient receptor potential cation channel, subfamily C, meml | 8951 | 0.152423 | 0.14655079 | 1.0629 | No |
| row_808 | FTSJ3   | FtsJ homolog 3 (E. coli)                                       | 8959 | 0.152058 | 0.14640039 | 1.0627 | No |
| row_809 | TWSG1   | twisted gastrulation homolog 1 (Drosophila)                    | 8963 | 0.151934 | 0.14644372 | 1.0627 | No |
| row_810 | HSPA5   | heat shock 70kD protein 5 (glucose-regulated protein)          | 8993 | 0.150455 | 0.14522499 | 1.0620 | No |
| row_811 | PPP2R2A | protein phosphatase 2 (formerly 2A), regulatory subunit B (PR  | 8994 | 0.150449 | 0.1454119  | 1.0620 | No |
| row_812 | ACO1    | aconitase 1                                                    | 9005 | 0.149920 | 0.14511342 | 1.0618 | No |
| row_813 | RNF141  | ring finger protein 141                                        | 9017 | 0.149420 | 0.14476588 | 1.0616 | No |
| row_814 | ARF4    | ADP-ribosylation factor 4                                      | 9031 | 0.148578 | 0.14432034 | 1.0613 | No |
| row_815 | SGTA    | small glutamine-rich tetratricopeptide repeat (TPR)-containing | 9084 | 0.146311 | 0.14198162 | 1.0603 | No |
| row_816 | GOT1    | glutamate oxaloacetate transaminase 1, soluble                 | 9091 | 0.146147 | 0.14187236 | 1.0602 | No |
| row_817 | ABCC5   | ATP-binding cassette, sub-family C (CFTR/MRP), member 5        | 9098 | 0.145789 | 0.14176264 | 1.0601 | No |
| row_818 | NBR1    | neighbor of Brca1 gene 1                                       | 9125 | 0.145247 | 0.14068285 | 1.0598 | No |
| row_819 | ITGB1   | Integrin beta 1 (fibronectin receptor beta)                    | 9138 | 0.144798 | 0.14028108 | 1.0596 | No |
| row_820 | ANKRD17 | ankyrin repeat domain 17                                       | 9158 | 0.144094 | 0.13953914 | 1.0606 | No |
| row_821 | DNMT3A  | DNA methyltransferase 3A                                       | 9177 | 0.143256 | 0.13884464 | 1.0746 | No |
| row_822 | IER3    | immediate early response 3                                     | 9180 | 0.143090 | 0.13892546 | 1.0882 | No |
| row_823 | TNFAIP8 | tumor necrosis factor, alpha-induced protein 8                 | 9204 | 0.141804 | 0.1379868  | 1.0584 | No |
| row_824 | CDYL    | chromodomain protein, Y chromosome-like                        | 9213 | 0.141505 | 0.13777483 | 1.0583 | No |
| row_825 | IRAK1   | interleukin-1 receptor-associated kinase 1                     | 9214 | 0.141430 | 0.13795052 | 1.0582 | No |
| row_826 | MAFB    | v-maf musculoaponeurotic fibrosarcoma oncogene family, prc     | 9275 | 0.139261 | 0.13521528 | 1.0573 | No |
| row_827 | SPOP    | speckle-type POZ protein                                       | 9276 | 0.139261 | 0.13538828 | 1.0573 | No |
| row_828 | BAG4    | BCL2-associated athanogene 4                                   | 9284 | 0.138594 | 0.13522117 | 1.0570 | No |

|         |          |                                                                    |       |          |             |        |    |
|---------|----------|--------------------------------------------------------------------|-------|----------|-------------|--------|----|
| row_829 | CCT7     | chaperonin subunit 7 (eta)                                         | 9318  | 0.137297 | 0.13379219  | 1.0565 | No |
| row_830 | HBLD2    | HESB like domain containing 2                                      | 9353  | 0.135952 | 0.13231307  | 1.0674 | No |
| row_831 | SPIN     | spindlin                                                           | 9372  | 0.135023 | 0.13160835  | 1.0555 | No |
| row_832 | EIF3S1   | eukaryotic translation initiation factor 3, subunit 1 alpha        | 9400  | 0.134285 | 0.13046646  | 1.0552 | No |
| row_833 | CDYL     | chromodomain protein, Y chromosome-like                            | 9419  | 0.133236 | 0.1297595   | 1.0952 | No |
| row_834 | HSPA2    | heat shock protein 2                                               | 9428  | 0.132816 | 0.12953673  | 1.0546 | No |
| row_835 | MTPN     | myotrophin                                                         | 9452  | 0.131930 | 0.1285858   | 1.0592 | No |
| row_836 | UBQLN1   | ubiquilin 1                                                        | 9480  | 0.130519 | 0.12743925  | 1.0536 | No |
| row_837 | TUBA4    | tubulin, alpha 4                                                   | 9528  | 0.129002 | 0.12532137  | 1.0530 | No |
| row_838 | DSG2     | desmoglein 2                                                       | 9549  | 0.128207 | 0.12451123  | 1.0850 | No |
| row_839 | SNX9     | sorting nexin 9                                                    | 9558  | 0.127846 | 0.124282286 | 1.0525 | No |
| row_840 | RUNX1    | runt related transcription factor 1                                | 9561  | 0.127663 | 0.12434394  | 1.0597 | No |
| row_841 | PAK1     | p21 (CDKN1A)-activated kinase 1                                    | 9568  | 0.127420 | 0.124211416 | 1.0570 | No |
| row_842 | FNDC4    | fibronectin type III domain containing 4                           | 9580  | 0.126867 | 0.12383584  | 1.0521 | No |
| row_843 | RNF11    | ring finger protein 11                                             | 9591  | 0.126355 | 0.1235081   | 1.0599 | No |
| row_844 | PVR      | poliovirus receptor                                                | 9601  | 0.126139 | 0.12322857  | 1.0518 | No |
| row_845 | SLC35F5  | solute carrier family 35, member F5                                | 9615  | 0.125843 | 0.12275479  | 1.0606 | No |
| row_846 | LACTB    | lactamase, beta                                                    | 9620  | 0.125652 | 0.122717    | 1.0591 | No |
| row_847 | PPP1R2   | protein phosphatase 1, regulatory (inhibitor) subunit 2            | 9632  | 0.125177 | 0.12233933  | 1.0514 | No |
| row_848 | PSMD11   | proteasome (prosome, macropain) 26S subunit, non-ATPase,           | 9641  | 0.124677 | 0.122106455 | 1.1008 | No |
| row_849 | TOB2     | transducer of ERBB2, 2                                             | 9667  | 0.123732 | 0.1210484   | 1.0511 | No |
| row_850 | CLCN3    | chloride channel 3                                                 | 9672  | 0.123265 | 0.12100764  | 1.0778 | No |
| row_851 | PTP4A1   | protein tyrosine phosphatase 4a1                                   | 9688  | 0.122495 | 0.12043276  | 1.0641 | No |
| row_852 | PITPNB   | phosphatidylinositol transfer protein, beta                        | 9699  | 0.122019 | 0.120099634 | 1.0725 | No |
| row_853 | APP      | amyloid beta (A4) precursor protein                                | 9707  | 0.121736 | 0.119911574 | 1.0499 | No |
| row_854 | HDLBP    | high density lipoprotein (HDL) binding protein                     | 9710  | 0.121707 | 0.11996583  | 1.0499 | No |
| row_855 | CLNS1A   | chloride channel, nucleotide-sensitive, 1A                         | 9719  | 0.121477 | 0.119728975 | 1.0498 | No |
| row_856 | BECN1    | beclin 1 (coiled-coil, myosin-like BCL2-interacting protein)       | 9764  | 0.119259 | 0.117744416 | 1.0556 | No |
| row_857 | RABGEF1  | RAB guanine nucleotide exchange factor (GEF) 1                     | 9783  | 0.118468 | 0.11701912  | 1.0485 | No |
| row_858 | SLC9A3R1 | solute carrier family 9 (sodium/hydrogen exchanger), isoform :     | 9794  | 0.118053 | 0.11668107  | 1.0484 | No |
| row_859 | ATP2A2   | ATPase, Ca++ transporting, cardiac muscle, slow twitch 2           | 9818  | 0.116810 | 0.11571135  | 1.0478 | No |
| row_860 | SERPINI1 | serine (or cysteine) peptidase inhibitor, clade I, member 1        | 9826  | 0.116505 | 0.1155168   | 1.0870 | No |
| row_861 | SERTAD2  | SERTA domain containing 2                                          | 9836  | 0.116117 | 0.11522481  | 1.0476 | No |
| row_862 | TXNDC4   | thioredoxin domain containing 4 (endoplasmic reticulum)            | 9859  | 0.115173 | 0.11430153  | 1.0472 | No |
| row_863 | RNF128   | ring finger protein 128                                            | 9899  | 0.113586 | 0.112552285 | 1.0498 | No |
| row_864 | VAT1     | vesicle amine transport protein 1 homolog (T californica)          | 9901  | 0.113487 | 0.1126448   | 1.0464 | No |
| row_865 | CFL2     | cofilin 2, muscle                                                  | 9903  | 0.113435 | 0.112737246 | 1.0464 | No |
| row_866 | MESDC2   | mesoderm development candiate 2                                    | 9923  | 0.112285 | 0.11195579  | 1.0459 | No |
| row_867 | HDLBP    | high density lipoprotein (HDL) binding protein                     | 9944  | 0.111335 | 0.111124694 | 1.0628 | No |
| row_868 | MAGOH    | mago-nashi homolog, proliferation-associated (Drosophila)          | 9960  | 0.110725 | 0.11053518  | 1.0453 | No |
| row_869 | SRPRB    | signal recognition particle receptor, B subunit                    | 9968  | 0.110461 | 0.110333115 | 1.0452 | No |
| row_870 | PCLO     | piccolo (presynaptic cytomatrix protein)                           | 9975  | 0.110210 | 0.1101792   | 1.0451 | No |
| row_871 | SLC1A1   | solute carrier family 1 (neuronal/epithelial high affinity glutama | 9987  | 0.109745 | 0.10978236  | 1.0449 | No |
| row_872 | SRR      | serine racemase                                                    | 10000 | 0.109204 | 0.109336376 | 1.0447 | No |
| row_873 | EIF3S6   | eukaryotic translation initiation factor 3, subunit 6              | 10002 | 0.109145 | 0.109423496 | 1.0446 | No |
| row_874 | EGR1     | early growth response 1                                            | 10008 | 0.108702 | 0.109316185 | 1.0859 | No |
| row_875 | GCNT2    | glucosaminyl (N-acetyl) transferase 2, I-branching enzyme          | 10030 | 0.107970 | 0.10843243  | 1.0963 | No |

|         |         |                                                                           |       |          |             |        |    |
|---------|---------|---------------------------------------------------------------------------|-------|----------|-------------|--------|----|
| row_876 | PPP2R1A | protein phosphatase 2 (formerly 2A), regulatory subunit A (PR             | 10034 | 0.107879 | 0.108421035 | 1.0441 | No |
| row_877 | DSCR1   | Down syndrome critical region homolog 1 (human)                           | 10054 | 0.107134 | 0.10763319  | 1.0438 | No |
| row_878 | ALDH9A1 | aldehyde dehydrogenase 9, subfamily A1                                    | 10066 | 0.106580 | 0.107232414 | 1.0436 | No |
| row_879 | NPM1    | nucleophosmin 1                                                           | 10071 | 0.106504 | 0.107170835 | 1.0435 | No |
| row_880 | PLEKHA3 | pleckstrin homology domain-containing, family A (phosphoino               | 10082 | 0.106139 | 0.10681798  | 1.0486 | No |
| row_881 | ASB3    | ankyrin repeat and SOCS box-containing protein 3                          | 10106 | 0.105039 | 0.10583365  | 1.0429 | No |
| row_882 | PUM1    | pumilio 1 (Drosophila)                                                    | 10126 | 0.103987 | 0.10504189  | 1.0443 | No |
| row_883 | F11R    | F11 receptor                                                              | 10133 | 0.103632 | 0.104879804 | 1.0423 | No |
| row_884 | ITGB1   | integrin beta 1 (fibronectin receptor beta)                               | 10163 | 0.101957 | 0.103600815 | 1.0416 | No |
| row_885 | FBXW2   | F-box and WD-40 domain protein 2                                          | 10179 | 0.101502 | 0.10299985  | 1.0414 | No |
| row_886 | CCNK    | cyclin K                                                                  | 10187 | 0.101257 | 0.10278635  | 1.0413 | No |
| row_887 | NCAM1   | neural cell adhesion molecule 1                                           | 10193 | 0.101052 | 0.10266953  | 1.0413 | No |
| row_888 | HNRPU   | heterogeneous nuclear ribonucleoprotein U                                 | 10194 | 0.100973 | 0.10279497  | 1.0497 | No |
| row_889 | RPS6KA3 | ribosomal protein S6 kinase polypeptide 3                                 | 10227 | 0.099750 | 0.101367824 | 1.0407 | No |
| row_890 | UGCG    | UDP-glucose ceramide glucosyltransferase                                  | 10236 | 0.099179 | 0.10110327  | 1.0405 | No |
| row_891 | MEIS1   | myeloid ecotropic viral integration site 1                                | 10239 | 0.099113 | 0.10112946  | 1.0404 | No |
| row_892 | PPP2R5C | protein phosphatase 2, regulatory subunit B (B56), gamma isc              | 10259 | 0.098248 | 0.10033057  | 1.0401 | No |
| row_893 | MAP2K7  | mitogen activated protein kinase kinase 7                                 | 10306 | 0.096631 | 0.09822096  | 1.0452 | No |
| row_894 | USP15   | ubiquitin specific peptidase 15                                           | 10307 | 0.096568 | 0.09834092  | 1.0394 | No |
| row_895 | LOX     | lysyl oxidase                                                             | 10315 | 0.096298 | 0.09812126  | 1.0424 | No |
| row_896 | CSNK2A1 | casein kinase II, alpha 1 polypeptide                                     | 10318 | 0.095934 | 0.098143496 | 1.0441 | No |
| row_897 | SENP2   | SUMO/sentrin specific peptidase 2                                         | 10319 | 0.095873 | 0.0982626   | 1.0391 | No |
| row_898 | RAB14   | RAB14, member RAS oncogene family                                         | 10321 | 0.095855 | 0.09833321  | 1.0391 | No |
| row_899 | METAP2  | methionine aminopeptidase 2                                               | 10337 | 0.095366 | 0.097724624 | 1.0389 | No |
| row_900 | CEBPB   | CCAAT/enhancer binding protein (C/EBP), beta                              | 10350 | 0.094632 | 0.097260535 | 1.0386 | No |
| row_901 | MTAP    | methylthioadenosine phosphorylase                                         | 10390 | 0.092993 | 0.0954857   | 1.0379 | No |
| row_902 | CCT3    | chaperonin subunit 3 (gamma)                                              | 10406 | 0.092548 | 0.094873615 | 1.0377 | No |
| row_903 | TUFT1   | tuftelin 1                                                                | 10407 | 0.092543 | 0.09498858  | 1.0377 | No |
| row_904 | NDN     | neccdin                                                                   | 10414 | 0.092068 | 0.09481213  | 1.0504 | No |
| row_905 | DDR1    | discoidin domain receptor family, member 1                                | 10428 | 0.091694 | 0.09429593  | 1.0374 | No |
| row_906 | VAMP3   | vesicle-associated membrane protein 3                                     | 10466 | 0.090322 | 0.09261471  | 1.0368 | No |
| row_907 | SEC63   | SEC63-like (S. cerevisiae)                                                | 10487 | 0.089618 | 0.09175663  | 1.0365 | No |
| row_908 | ARIH1   | ariadne ubiquitin-conjugating enzyme E2 binding protein hom               | 10498 | 0.089280 | 0.09138284  | 1.0364 | No |
| row_909 | CLDN2   | claudin 2                                                                 | 10519 | 0.088430 | 0.09052328  | 1.0360 | No |
| row_910 | BTK     | Bruton agammaglobulinemia tyrosine kinase                                 | 10534 | 0.087812 | 0.08995377  | 1.0358 | No |
| row_911 | MTAP    | methylthioadenosine phosphorylase                                         | 10553 | 0.087186 | 0.08918961  | 1.0355 | No |
| row_912 | PRKG1   | protein kinase, cGMP-dependent, type I                                    | 10590 | 0.085839 | 0.0875513   | 1.0361 | No |
| row_913 | PIP5K1A | phosphatidylinositol-4-phosphate 5-kinase, type 1 alpha                   | 10609 | 0.085122 | 0.08678458  | 1.0346 | No |
| row_914 | TRIM2   | tripartite motif protein 2                                                | 10610 | 0.085119 | 0.086890325 | 1.0387 | No |
| row_915 | ATP1A1  | ATPase, Na <sup>+</sup> /K <sup>+</sup> transporting, alpha 1 polypeptide | 10657 | 0.083460 | 0.08476435  | 1.0340 | No |
| row_916 | SLC6A6  | solute carrier family 6 (neurotransmitter transporter, taurine), r        | 10665 | 0.083026 | 0.0845282   | 1.0514 | No |
| row_917 | CSNK1D  | casein kinase 1, delta                                                    | 10677 | 0.082521 | 0.084097534 | 1.0336 | No |
| row_918 | ARF2    | ADP-ribosylation factor 2                                                 | 10719 | 0.080385 | 0.0822101   | 1.0352 | No |
| row_919 | PTPN2   | protein tyrosine phosphatase, non-receptor type 2                         | 10733 | 0.079951 | 0.0816793   | 1.0325 | No |
| row_920 | APP     | Amyloid beta (A4) precursor protein                                       | 10734 | 0.079935 | 0.08177861  | 1.0325 | No |
| row_921 | RNF111  | ring finger 111                                                           | 10742 | 0.079598 | 0.08153819  | 1.0324 | No |
| row_922 | MAFK    | v-maf musculoaponeurotic fibrosarcoma oncogene family, prc                | 10759 | 0.078911 | 0.0808607   | 1.0321 | No |

|         |          |                                                                   |       |          |             |        |    |
|---------|----------|-------------------------------------------------------------------|-------|----------|-------------|--------|----|
| row_923 | MYD88    | myeloid differentiation primary response gene 88                  | 10796 | 0.077316 | 0.079211794 | 1.0314 | No |
| row_924 | SRPK2    | serine/arginine-rich protein specific kinase 2                    | 10799 | 0.077216 | 0.07921078  | 1.0622 | No |
| row_925 | PPP2CA   | protein phosphatase 2 (formerly 2A), catalytic subunit, alpha i   | 10825 | 0.076207 | 0.078093685 | 1.0310 | No |
| row_926 | STK24    | serine/threonine kinase 24 (STE20 homolog, yeast)                 | 10853 | 0.075130 | 0.07687831  | 1.0305 | No |
| row_927 | HDAC2    | histone deacetylase 2                                             | 10869 | 0.074433 | 0.07624371  | 1.0302 | No |
| row_928 | MTCH1    | mitochondrial carrier homolog 1 (C. elegans)                      | 10887 | 0.073517 | 0.075511046 | 1.0298 | No |
| row_929 | DBI      | diazepam binding inhibitor                                        | 10888 | 0.073517 | 0.075602375 | 1.0298 | No |
| row_930 | CDC42    | cell division cycle 42 homolog (S. cerevisiae)                    | 10925 | 0.072047 | 0.07394693  | 1.0292 | No |
| row_931 | GHITM    | growth hormone inducible transmembrane protein                    | 10930 | 0.071943 | 0.07384242  | 1.0292 | No |
| row_932 | NUDT4    | nudix (nucleoside diphosphate linked moiety X)-type motif 4       | 10943 | 0.071394 | 0.07334947  | 1.0455 | No |
| row_933 | BAG3     | Bcl2-associated athanogene 3                                      | 10945 | 0.071258 | 0.07338952  | 1.0289 | No |
| row_934 | RPL23    | ribosomal protein L23                                             | 10948 | 0.071114 | 0.073380925 | 1.0289 | No |
| row_935 | CSNK1E   | casein kinase 1, epsilon                                          | 10970 | 0.070264 | 0.072450325 | 1.0310 | No |
| row_936 | RNF128   | ring finger protein 128                                           | 10977 | 0.070004 | 0.07224647  | 1.0284 | No |
| row_937 | RUSC1    | RUN and SH3 domain containing 1                                   | 10985 | 0.069649 | 0.0719937   | 1.0335 | No |
| row_938 | GALNT1   | UDP-N-acetyl-alpha-D-galactosamine:polypeptide N-acetylgl         | 10988 | 0.069565 | 0.07198318  | 1.0282 | No |
| row_939 | UGP2     | UDP-glucose pyrophosphorylase 2                                   | 11005 | 0.068735 | 0.07129303  | 1.0315 | No |
| row_940 | BCL6     | B-cell leukemia/lymphoma 6                                        | 11023 | 0.067988 | 0.0705535   | 1.0282 | No |
| row_941 | RAP1GDS1 | RAP1, GTP-GDP dissociation stimulator 1                           | 11075 | 0.065975 | 0.06816345  | 1.0320 | No |
| row_942 | FKBP1A   | FK506 binding protein 1a                                          | 11109 | 0.064371 | 0.06664388  | 1.0261 | No |
| row_943 | DSG2     | desmoglein 2                                                      | 11146 | 0.062890 | 0.064977065 | 1.0410 | No |
| row_944 | PSEN1    | presenilin 1                                                      | 11167 | 0.062084 | 0.064084776 | 1.0251 | No |
| row_945 | SRF      | serum response factor                                             | 11168 | 0.062052 | 0.06416186  | 1.0251 | No |
| row_946 | PSMC5    | protease (prosome, macropain) 26S subunit, ATPase 5               | 11172 | 0.061677 | 0.06409307  | 1.0250 | No |
| row_947 | CLCN3    | chloride channel 3                                                | 11182 | 0.061295 | 0.06373298  | 1.0248 | No |
| row_948 | NPM1     | Nucleophosmin 1                                                   | 11193 | 0.060903 | 0.06332393  | 1.0247 | No |
| row_949 | TSN      | translin                                                          | 11197 | 0.060698 | 0.063253924 | 1.0246 | No |
| row_950 | RASSF3   | Ras association (RalGDS/AF-6) domain family 3                     | 11209 | 0.060234 | 0.06279558  | 1.0244 | No |
| row_951 | GPLD1    | glycosylphosphatidylinositol specific phospholipase D1            | 11244 | 0.059356 | 0.06122131  | 1.0265 | No |
| row_952 | VLDLR    | very low density lipoprotein receptor                             | 11295 | 0.057297 | 0.058868952 | 1.0305 | No |
| row_953 | PAFAH1B1 | platelet-activating factor acetylhydrolase, isoform 1b, beta1 su  | 11313 | 0.056658 | 0.058115337 | 1.0559 | No |
| row_954 | WAC      | WW domain containing adaptor with coiled-coil                     | 11354 | 0.054657 | 0.056244407 | 1.0221 | No |
| row_955 | TIPARP   | TCDD-inducible poly(ADP-ribose) polymerase                        | 11374 | 0.053757 | 0.055390246 | 1.0217 | No |
| row_956 | TXNDC1   | thioredoxin domain containing 1                                   | 11381 | 0.053393 | 0.055165753 | 1.0216 | No |
| row_957 | DNMT3A   | DNA methyltransferase 3A                                          | 11393 | 0.052869 | 0.05469825  | 1.0341 | No |
| row_958 | RAB2     | RAB2, member RAS oncogene family                                  | 11404 | 0.052585 | 0.05427887  | 1.0213 | No |
| row_959 | TAF13    | TAF13 RNA polymerase II, TATA box binding protein (TBP)-a         | 11407 | 0.052444 | 0.05424708  | 1.0212 | No |
| row_960 | CAPN7    | calpain 7                                                         | 11409 | 0.052412 | 0.054263722 | 1.0212 | No |
| row_961 | ARHGAP6  | Rho GTPase activating protein 6                                   | 11415 | 0.052094 | 0.05408608  | 1.0211 | No |
| row_962 | WBP11    | WW domain binding protein 11                                      | 11418 | 0.052029 | 0.054053776 | 1.0210 | No |
| row_963 | SLC7A5   | solute carrier family 7 (cationic amino acid transporter, y+ syst | 11439 | 0.051089 | 0.05314783  | 1.0209 | No |
| row_964 | PDCD6IP  | programmed cell death 6 interacting protein                       | 11455 | 0.050300 | 0.052483257 | 1.0203 | No |
| row_965 | PTPN12   | protein tyrosine phosphatase, non-receptor type 12                | 11467 | 0.049922 | 0.052012097 | 1.0236 | No |
| row_966 | GOLPH3   | golgi phosphoprotein 3                                            | 11471 | 0.049770 | 0.051928513 | 1.0201 | No |
| row_967 | IL1RAPL2 | interleukin 1 receptor accessory protein-like 2                   | 11483 | 0.049230 | 0.051456496 | 1.0199 | No |
| row_968 | STARD3NL | STARD3 N-terminal like                                            | 11500 | 0.048588 | 0.050741322 | 1.0233 | No |
| row_969 | USP9X    | ubiquitin specific peptidase 9, X chromosome                      | 11505 | 0.048075 | 0.050607163 | 1.0194 | No |

|          |          |                                                                  |       |          |             |        |    |
|----------|----------|------------------------------------------------------------------|-------|----------|-------------|--------|----|
| row_970  | CSNK1D   | casein kinase 1, delta                                           | 11511 | 0.047760 | 0.050424144 | 1.0193 | No |
| row_971  | FKBP1A   | FK506 binding protein 1a                                         | 11517 | 0.047590 | 0.050240908 | 1.0192 | No |
| row_972  | API5     | apoptosis inhibitor 5                                            | 11540 | 0.046755 | 0.049232636 | 1.0189 | No |
| row_973  | DNMT3A   | DNA methyltransferase 3A                                         | 11547 | 0.046608 | 0.048999712 | 1.0188 | No |
| row_974  | YAF2     | YY1 associated factor 2                                          | 11555 | 0.046155 | 0.048717756 | 1.0186 | No |
| row_975  | DNAJA1   | DnaJ (Hsp40) homolog, subfamily A, member 1                      | 11564 | 0.045887 | 0.048387    | 1.0185 | No |
| row_976  | TAC1     | tachykinin 1                                                     | 11571 | 0.045738 | 0.048152994 | 1.0185 | No |
| row_977  | MAP1LC3B | microtubule-associated protein 1 light chain 3 beta              | 11581 | 0.045319 | 0.047773056 | 1.0183 | No |
| row_978  | EIF2S2   | eukaryotic translation initiation factor 2, subunit 2 (beta)     | 11582 | 0.045314 | 0.04782935  | 1.0183 | No |
| row_979  | BXDC1    | brix domain containing 1                                         | 11583 | 0.045271 | 0.04788559  | 1.0183 | No |
| row_980  | PAFAH1B2 | platelet-activating factor acetylhydrolase, isoform 1b, alpha2 s | 11590 | 0.044919 | 0.04765057  | 1.0181 | No |
| row_981  | SLPI     | secretory leukocyte peptidase inhibitor                          | 11596 | 0.044706 | 0.047463752 | 1.0473 | No |
| row_982  | PRDX1    | peroxiredoxin 1                                                  | 11599 | 0.044550 | 0.04742216  | 1.0180 | No |
| row_983  | HNRPAB   | heterogeneous nuclear ribonucleoprotein A/B                      | 11610 | 0.044244 | 0.046992414 | 1.0179 | No |
| row_984  | BZW1     | basic leucine zipper and W2 domains 1                            | 11615 | 0.044135 | 0.04685336  | 1.0178 | No |
| row_985  | NCAM1    | neural cell adhesion molecule 1                                  | 11629 | 0.043561 | 0.046277355 | 1.0232 | No |
| row_986  | ITGB1    | integrin beta 1 (fibronectin receptor beta)                      | 11673 | 0.042045 | 0.044245347 | 1.0170 | No |
| row_987  | HNRPAB   | heterogeneous nuclear ribonucleoprotein A/B                      | 11685 | 0.041516 | 0.043763746 | 1.0167 | No |
| row_988  | FOS      | FBJ osteosarcoma oncogene                                        | 11688 | 0.041354 | 0.043718178 | 1.0389 | No |
| row_989  | DHX36    | DEAH (Asp-Glu-Ala-His) box polypeptide 36                        | 11692 | 0.041235 | 0.04362399  | 1.0180 | No |
| row_990  | RAP2C    | RAP2C, member of RAS oncogene family                             | 11705 | 0.040717 | 0.043092925 | 1.0164 | No |
| row_991  | ARPC4    | actin related protein 2/3 complex, subunit 4                     | 11721 | 0.040199 | 0.042415805 | 1.0211 | No |
| row_992  | EIF2S2   | eukaryotic translation initiation factor 2, subunit 2 (beta)     | 11745 | 0.039617 | 0.041350193 | 1.0160 | No |
| row_993  | CPEB4    | cytoplasmic polyadenylation element binding protein 4            | 11746 | 0.039588 | 0.041399375 | 1.0160 | No |
| row_994  | ERO1L    | ERO1-like (S. cerevisiae)                                        | 11758 | 0.039124 | 0.0409148   | 1.0199 | No |
| row_995  | MYNN     | myoneurin                                                        | 11763 | 0.038920 | 0.040769268 | 1.0157 | No |
| row_996  | RAD18    | RAD18 homolog (S. cerevisiae)                                    | 11777 | 0.038306 | 0.040186733 | 1.0154 | No |
| row_997  | DHX36    | DEAH (Asp-Glu-Ala-His) box polypeptide 36                        | 11821 | 0.036324 | 0.038147617 | 1.0146 | No |
| row_998  | ARIH1    | ariadne ubiquitin-conjugating enzyme E2 binding protein hom      | 11840 | 0.035355 | 0.037319068 | 1.0142 | No |
| row_999  | AHCYL1   | S-adenosylhomocysteine hydrolase-like 1                          | 11861 | 0.034380 | 0.03639236  | 1.0234 | No |
| row_1000 | SFMBT1   | Scm-like with four mbt domains 1                                 | 11888 | 0.033506 | 0.035173748 | 1.0148 | No |
| row_1001 | OXR1     | oxidation resistance 1                                           | 11896 | 0.033303 | 0.034875825 | 1.0155 | No |
| row_1002 | YWHAZ    | tyrosine 3-monooxygenase/tryptophan 5-monooxygenase acti         | 11936 | 0.031744 | 0.0330249   | 1.0128 | No |
| row_1003 | TKT      | transketolase                                                    | 11961 | 0.030652 | 0.03189968  | 1.0123 | No |
| row_1004 | PAFAH1B1 | platelet-activating factor acetylhydrolase, isoform 1b, beta1 su | 11968 | 0.030395 | 0.031646617 | 1.0122 | No |
| row_1005 | GLRX2    | glutaredoxin 2 (thioltransferase)                                | 11990 | 0.029619 | 0.030665526 | 1.0119 | No |
| row_1006 | MRPL50   | mitochondrial ribosomal protein L50                              | 11994 | 0.029454 | 0.030556705 | 1.0119 | No |
| row_1007 | SNX3     | sorting nexin 3                                                  | 12007 | 0.029085 | 0.030011188 | 1.0117 | No |
| row_1008 | PTP4A2   | protein tyrosine phosphatase 4a2                                 | 12020 | 0.028684 | 0.029465172 | 1.0115 | No |
| row_1009 | LMAN2    | lectin, mannose-binding 2                                        | 12023 | 0.028622 | 0.029403789 | 1.0115 | No |
| row_1010 | CAB39    | calcium binding protein 39                                       | 12049 | 0.027990 | 0.028226791 | 1.0138 | No |
| row_1011 | GNG12    | guanine nucleotide binding protein (G protein), gamma 12         | 12052 | 0.027965 | 0.028164592 | 1.0124 | No |
| row_1012 | MYO6     | myosin VI                                                        | 12053 | 0.027957 | 0.028199323 | 1.0114 | No |
| row_1013 | SLCO3A1  | solute carrier organic anion transporter family, member 3a1      | 12072 | 0.027330 | 0.0273608   | 1.0110 | No |
| row_1014 | HMG1     | high mobility group nucleosomal binding domain 1                 | 12086 | 0.027037 | 0.02676427  | 1.0211 | No |
| row_1015 | CANX     | calnexin                                                         | 12089 | 0.026967 | 0.02670083  | 1.0137 | No |
| row_1016 | TWSG1    | twisted gastrulation homolog 1 (Drosophila)                      | 12092 | 0.026888 | 0.02663729  | 1.0178 | No |

|          |         |                                                               |       |          |             |        |    |
|----------|---------|---------------------------------------------------------------|-------|----------|-------------|--------|----|
| row_1017 | CAB39   | calcium binding protein 39                                    | 12100 | 0.026689 | 0.02633115  | 1.0118 | No |
| row_1018 | BRE     | brain and reproductive organ-expressed protein                | 12105 | 0.026411 | 0.026170077 | 1.0120 | No |
| row_1019 | SUCLA2  | succinate-Coenzyme A ligase, ADP-forming, beta subunit        | 12127 | 0.025646 | 0.025184052 | 1.0103 | No |
| row_1020 | LYST    | lysosomal trafficking regulator                               | 12131 | 0.025540 | 0.025070367 | 1.0103 | No |
| row_1021 | PODXL   | podocalyxin-like                                              | 12151 | 0.024590 | 0.02417997  | 1.0099 | No |
| row_1022 | GNB1    | guanine nucleotide binding protein, beta 1                    | 12155 | 0.024457 | 0.024064941 | 1.0098 | No |
| row_1023 | KIF1B   | kinesin family member 1B                                      | 12164 | 0.024046 | 0.023707049 | 1.0210 | No |
| row_1024 | DDX3X   | DEAD/H (Asp-Glu-Ala-Asp/His) box polypeptide 3, X-linked      | 12166 | 0.024035 | 0.023688436 | 1.0110 | No |
| row_1025 | FOSL1   | fos-like antigen 1                                            | 12167 | 0.024024 | 0.02371828  | 1.0097 | No |
| row_1026 | QSCN6   | quiescin Q6                                                   | 12202 | 0.022827 | 0.022098633 | 1.0092 | No |
| row_1027 | RUSC1   | RUN and SH3 domain containing 1                               | 12210 | 0.022550 | 0.021787351 | 1.0091 | No |
| row_1028 | MEF2C   | myocyte enhancer factor 2C                                    | 12225 | 0.021897 | 0.021135963 | 1.0088 | No |
| row_1029 | TTC3    | tetratricopeptide repeat domain 3                             | 12226 | 0.021866 | 0.021163128 | 1.0129 | No |
| row_1030 | ARF3    | ADP-ribosylation factor 3                                     | 12243 | 0.021139 | 0.020413857 | 1.0085 | No |
| row_1031 | YWHAQ   | 3-monooxygenase/tryptophan 5-monooxygenase activation pr      | 12246 | 0.020911 | 0.020342894 | 1.0099 | No |
| row_1032 | BMPR1A  | bone morphogenetic protein receptor, type 1A                  | 12278 | 0.019965 | 0.018865103 | 1.0118 | No |
| row_1033 | SRPK2   | serine/arginine-rich protein specific kinase 2                | 12339 | 0.017907 | 0.015979104 | 1.0072 | No |
| row_1034 | HRSP12  | heat-responsive protein 12                                    | 12344 | 0.017653 | 0.01580715  | 1.0071 | No |
| row_1035 | LATS2   | large tumor suppressor 2                                      | 12355 | 0.017381 | 0.015344035 | 1.0070 | No |
| row_1036 | ATP5A1  | ATP synthase, H+ transporting, mitochondrial F1 complex, al   | 12368 | 0.017070 | 0.014783593 | 1.0069 | No |
| row_1037 | CCT8    | chaperonin subunit 8 (theta)                                  | 12371 | 0.016971 | 0.014707734 | 1.0068 | No |
| row_1038 | MGEA5   | meningioma expressed antigen 5 (hyaluronidase)                | 12388 | 0.016496 | 0.013952696 | 1.0076 | No |
| row_1039 | CTSB    | cathepsin B                                                   | 12389 | 0.016414 | 0.013973086 | 1.0073 | No |
| row_1040 | MPL     | myeloproliferative leukemia virus oncogene                    | 12390 | 0.016367 | 0.013993419 | 1.0066 | No |
| row_1041 | CEACAM1 | CEA-related cell adhesion molecule 1                          | 12391 | 0.016249 | 0.014013605 | 1.0065 | No |
| row_1042 | NCOA6IP | nuclear receptor coactivator 6 interacting protein            | 12404 | 0.015810 | 0.013451597 | 1.0063 | No |
| row_1043 | SPATA6  | spermatogenesis associated 6                                  | 12412 | 0.015619 | 0.013131705 | 1.0095 | No |
| row_1044 | NOLC1   | nucleolar and coiled-body phosphoprotein 1                    | 12418 | 0.015284 | 0.012908339 | 1.0061 | No |
| row_1045 | GLRX2   | glutaredoxin 2 (thioltransferase)                             | 12424 | 0.015163 | 0.012684822 | 1.0061 | No |
| row_1046 | MYH9    | myosin, heavy polypeptide 9, non-muscle                       | 12425 | 0.015132 | 0.012703621 | 1.0061 | No |
| row_1047 | TPM3    | Tropomyosin 3, gamma                                          | 12426 | 0.015078 | 0.012722352 | 1.0060 | No |
| row_1048 | PPP3R1  | protein phosphatase 3, regulatory subunit B, alpha isoform (c | 12435 | 0.014690 | 0.012352835 | 1.0067 | No |
| row_1049 | SFRS1   | splicing factor, arginine/serine-rich 1 (ASF/SF2)             | 12453 | 0.014169 | 0.011546434 | 1.0059 | No |
| row_1050 | EMP2    | epithelial membrane protein 2                                 | 12497 | 0.012338 | 0.00947752  | 1.0049 | No |
| row_1051 | IFRG15  | interferon alpha responsive gene                              | 12507 | 0.012004 | 0.009056196 | 1.0048 | No |
| row_1052 | PTPN12  | protein tyrosine phosphatase, non-receptor type 12            | 12516 | 0.011814 | 0.008683107 | 1.0047 | No |
| row_1053 | USP9X   | ubiquitin specific peptidase 9, X chromosome                  | 12517 | 0.011808 | 0.008697775 | 1.0047 | No |
| row_1054 | LCP1    | lymphocyte cytosolic protein 1                                | 12543 | 0.010725 | 0.007499331 | 1.0043 | No |
| row_1055 | DUSP6   | dual specificity phosphatase 6                                | 12561 | 0.010306 | 0.006688132 | 1.0041 | No |
| row_1056 | HIBADH  | 3-hydroxyisobutyrate dehydrogenase                            | 12565 | 0.010170 | 0.006555354 | 1.0041 | No |
| row_1057 | BCAP29  | B-cell receptor-associated protein 29                         | 12577 | 0.009647 | 0.006034161 | 1.0039 | No |
| row_1058 | CRK     | v-crk sarcoma virus CT10 oncogene homolog (avian)             | 12578 | 0.009625 | 0.006046118 | 1.0048 | No |
| row_1059 | HIBADH  | 3-hydroxyisobutyrate dehydrogenase                            | 12593 | 0.009268 | 0.005379041 | 1.0042 | No |
| row_1060 | DSC2    | desmocollin 2                                                 | 12617 | 0.008527 | 0.004274807 | 1.0034 | No |
| row_1061 | MYNN    | myoneurin                                                     | 12626 | 0.008228 | 0.003897263 | 1.0033 | No |
| row_1062 | PURB    | purine rich element binding protein B                         | 12650 | 0.007322 | 0.002791531 | 1.0042 | No |
| row_1063 | ACP1    | acid phosphatase 1, soluble                                   | 12659 | 0.006933 | 0.002412378 | 1.0029 | No |



|          |           |                                                                   |       |           |              |        |    |
|----------|-----------|-------------------------------------------------------------------|-------|-----------|--------------|--------|----|
| row_1064 | CHD1      | chromodomain helicase DNA binding protein 1                       | 12674 | 0.006460  | 0.001741812  | 1.0033 | No |
| row_1065 | PKM2      | pyruvate kinase, muscle                                           | 12676 | 0.006333  | 0.001701209  | 1.0025 | No |
| row_1066 | WDR1      | WD repeat domain 1                                                | 12678 | 0.006285  | 0.001660546  | 1.0027 | No |
| row_1067 | ADAMTS1   | a disintegrin-like and metallopeptidase (reprolysin type) with th | 12724 | 0.004644  | -0.000515    | 1.0022 | No |
| row_1068 | ASH1L     | ash1 (absent, small, or homeotic)-like (Drosophila)               | 12725 | 0.004611  | -0.000509    | 1.0018 | No |
| row_1069 | CLDN2     | claudin 2                                                         | 12729 | 0.004490  | -0.000649    | 1.0018 | No |
| row_1070 | GCNT2     | glucosaminyl (N-acetyl) transferase 2, I-branching enzyme         | 12744 | 0.004088  | -0.001322488 | 1.0027 | No |
| row_1071 | CTSB      | cathepsin B                                                       | 12751 | 0.003888  | -0.001608482 | 1.0016 | No |
| row_1072 | CCT3      | chaperonin subunit 3 (gamma)                                      | 12755 | 0.003797  | -0.001749177 | 1.0015 | No |
| row_1073 | PAPOLA    | poly (A) polymerase alpha                                         | 12760 | 0.003684  | -0.001938483 | 1.0015 | No |
| row_1074 | PPP2R5C   | protein phosphatase 2, regulatory subunit B (B56), gamma isc      | 12796 | 0.002515  | -0.003631835 | 1.0014 | No |
| row_1075 | TXNRD1    | thioredoxin reductase 1                                           | 12799 | 0.002452  | -0.00372573  | 1.0014 | No |
| row_1076 | TRIM37    | tripartite motif protein 37                                       | 12807 | 0.002135  | -0.004062373 | 1.0009 | No |
| row_1077 | GFPT1     | glutamine fructose-6-phosphate transaminase 1                     | 12822 | 0.001557  | -0.004739029 | 1.0008 | No |
| row_1078 | SLC31A1   | solute carrier family 31, member 1                                | 12848 | 0.000605  | -0.005950047 | 1.0002 | No |
| row_1079 | BET1      | blocked early in transport 1 homolog (S. cerevisiae)              | 12869 | -5.86e-05 | -0.006919389 | 1.0000 | No |
| row_1080 | HDLBP     | high density lipoprotein (HDL) binding protein                    | 12878 | -0.000356 | -0.007306713 | 0.9999 | No |
| row_1081 | SDCBP     | syndecan binding protein                                          | 12879 | -0.000382 | -0.007306239 | 0.9998 | No |
| row_1082 | TRIM24    | tripartite motif protein 24                                       | 12884 | -0.000415 | -0.007499607 | 0.9998 | No |
| row_1083 | MCL1      | myeloid cell leukemia sequence 1                                  | 12886 | -0.000498 | -0.007547459 | 0.9998 | No |
| row_1084 | TLK2      | tousled-like kinase 2 (Arabidopsis)                               | 12898 | -0.001024 | -0.008079365 | 0.9996 | No |
| row_1085 | PTEN      | phosphatase and tensin homolog                                    | 12901 | -0.001081 | -0.008174963 | 0.9996 | No |
| row_1086 | MAP2K5    | mitogen activated protein kinase kinase 5                         | 12905 | -0.001163 | -0.008318931 | 0.9993 | No |
| row_1087 | IL6ST     | interleukin 6 signal transducer                                   | 12939 | -0.002634 | -0.009915193 | 0.9989 | No |
| row_1088 | TXNL2     | thioredoxin-like 2                                                | 12951 | -0.003263 | -0.010444317 | 0.9987 | No |
| row_1089 | APLP2     | amyloid beta (A4) precursor-like protein 2                        | 12985 | -0.004299 | -0.01203851  | 0.9983 | No |
| row_1090 | TM9SF1    | transmembrane 9 superfamily member 1                              | 12989 | -0.004477 | -0.012178361 | 0.9982 | No |
| row_1091 | DDR1      | discoidin domain receptor family, member 1                        | 12997 | -0.004960 | -0.012511496 | 0.9979 | No |
| row_1092 | IKBKG     | inhibitor of kappaB kinase gamma                                  | 13009 | -0.005329 | -0.013038053 | 0.9979 | No |
| row_1093 | PTPRK     | protein tyrosine phosphatase, receptor type, K                    | 13017 | -0.005774 | -0.013370175 | 0.9977 | No |
| row_1094 | UBQLN1    | ubiquilin 1                                                       | 13037 | -0.006417 | -0.014283148 | 0.9974 | No |
| row_1095 | IKBKG     | inhibitor of kappaB kinase gamma                                  | 13038 | -0.006495 | -0.014275079 | 0.9965 | No |
| row_1096 | TRAM1     | translocating chain-associating membrane protein 1                | 13041 | -0.006619 | -0.014363797 | 0.9974 | No |
| row_1097 | UBE2L3    | ubiquitin-conjugating enzyme E2L 3                                | 13046 | -0.006807 | -0.014549224 | 0.9973 | No |
| row_1098 | BECN1     | beclin 1 (coiled-coil, myosin-like BCL2-interacting protein)      | 13061 | -0.007481 | -0.015218521 | 0.9970 | No |
| row_1099 | DDR1      | discoidin domain receptor family, member 1                        | 13072 | -0.007814 | -0.015693521 | 0.9969 | No |
| row_1100 | PCOLN3    | procollagen (type III) N-endopeptidase                            | 13078 | -0.007921 | -0.015926033 | 0.9968 | No |
| row_1101 | KCMF1     | potassium channel modulatory factor 1                             | 13098 | -0.008514 | -0.016836401 | 0.9966 | No |
| row_1102 | NDFIP1    | Nedd4 family interacting protein 1                                | 13116 | -0.009190 | -0.017648987 | 0.9963 | No |
| row_1103 | GABARAPL1 | gamma-aminobutyric acid (GABA(A)) receptor-associated pro         | 13117 | -0.009237 | -0.017637512 | 0.9963 | No |
| row_1104 | TIAM1     | T-cell lymphoma invasion and metastasis 1                         | 13120 | -0.009356 | -0.01772283  | 0.9963 | No |
| row_1105 | APP       | amyloid beta (A4) precursor protein                               | 13125 | -0.009433 | -0.017904995 | 0.9950 | No |
| row_1106 | TLR4      | toll-like receptor 4                                              | 13166 | -0.010668 | -0.019830573 | 0.9957 | No |
| row_1107 | MTCH2     | mitochondrial carrier homolog 2 (C. elegans)                      | 13184 | -0.011523 | -0.02064026  | 0.9954 | No |
| row_1108 | CTCF      | CCCTC-binding factor                                              | 13186 | -0.011734 | -0.020674154 | 0.9953 | No |
| row_1109 | SPIN      | spindlin                                                          | 13212 | -0.012731 | -0.021870106 | 0.9949 | No |
| row_1110 | BAZ1B     | bromodomain adjacent to zinc finger domain, 1B                    | 13262 | -0.014569 | -0.024227073 | 0.9942 | No |

|          |          |                                                                  |       |           |              |        |    |
|----------|----------|------------------------------------------------------------------|-------|-----------|--------------|--------|----|
| row_1111 | GLIPR1   | GLI pathogenesis-related 1 (glioma)                              | 13276 | -0.014961 | -0.024838606 | 0.9940 | No |
| row_1112 | PAK1     | p21 (CDKN1A)-activated kinase 1                                  | 13292 | -0.015712 | -0.025546148 | 0.9937 | No |
| row_1113 | ACVR1    | activin A receptor, type 1                                       | 13301 | -0.016059 | -0.025913965 | 0.9908 | No |
| row_1114 | FKBP1A   | FK506 binding protein 1a                                         | 13302 | -0.016097 | -0.025893968 | 0.9936 | No |
| row_1115 | ST13     | suppression of tumorigenicity 13                                 | 13324 | -0.016797 | -0.026890986 | 0.9933 | No |
| row_1116 | ULK2     | Unc-51 like kinase 2 (C. elegans)                                | 13348 | -0.017994 | -0.027983459 | 0.9928 | No |
| row_1117 | QSCN6    | Quiescin Q6                                                      | 13361 | -0.018400 | -0.02854225  | 0.9927 | No |
| row_1118 | NCBP2    | nuclear cap binding protein subunit 2                            | 13362 | -0.018473 | -0.0285193   | 0.9884 | No |
| row_1119 | DBI      | diazepam binding inhibitor                                       | 13366 | -0.018934 | -0.028641192 | 0.9925 | No |
| row_1120 | YAF2     | YY1 associated factor 2                                          | 13378 | -0.019413 | -0.029150253 | 0.9923 | No |
| row_1121 | PDCD6IP  | programmed cell death 6 interacting protein                      | 13384 | -0.019530 | -0.029368345 | 0.9890 | No |
| row_1122 | ACADL    | acyl-Coenzyme A dehydrogenase, long-chain                        | 13386 | -0.019707 | -0.029392334 | 0.9921 | No |
| row_1123 | LYST     | lysosomal trafficking regulator                                  | 13401 | -0.020268 | -0.030045746 | 0.9919 | No |
| row_1124 | RAB14    | RAB14, member RAS oncogene family                                | 13415 | -0.021261 | -0.030649453 | 0.9915 | No |
| row_1125 | YWHAH    | tyrosine 3-monooxygenase/tryptophan 5-monooxygenase acti         | 13442 | -0.022372 | -0.0318819   | 0.9911 | No |
| row_1126 | UBE2G1   | ubiquitin-conjugating enzyme E2G 1 (UBC7 homolog, C. eleg        | 13458 | -0.022826 | -0.032580607 | 0.9909 | No |
| row_1127 | PTP4A2   | protein tyrosine phosphatase 4a2                                 | 13461 | -0.023039 | -0.032648925 | 0.9908 | No |
| row_1128 | RPL23    | ribosomal protein L23                                            | 13491 | -0.023859 | -0.034024935 | 0.9905 | No |
| row_1129 | CCT2     | chaperonin subunit 2 (beta)                                      | 13495 | -0.024232 | -0.034140244 | 0.9904 | No |
| row_1130 | BECN1    | beclin 1 (coiled-coil, myosin-like BCL2-interacting protein)     | 13496 | -0.024286 | -0.034110077 | 0.9903 | No |
| row_1131 | SHPRH    | SNF2 histone linker PHD RING helicase                            | 13502 | -0.024677 | -0.034321774 | 0.9902 | No |
| row_1132 | CSTF2    | cleavage stimulation factor, 3' pre-RNA subunit 2                | 13546 | -0.026443 | -0.036373165 | 0.9876 | No |
| row_1133 | PPM1A    | protein phosphatase 1A, magnesium dependent, alpha isoform       | 13592 | -0.028269 | -0.03851923  | 0.9888 | No |
| row_1134 | SLC25A15 | solute carrier family 25 (mitochondrial carrier ornithine transp | 13601 | -0.028809 | -0.038871206 | 0.9885 | No |
| row_1135 | TEX2     | testis expressed gene 2                                          | 13603 | -0.028907 | -0.038883768 | 0.9885 | No |
| row_1136 | ARL6IP5  | ADP-ribosylation factor-like 6 interacting protein 5             | 13613 | -0.029223 | -0.0392837   | 0.9881 | No |
| row_1137 | GNB1     | guanine nucleotide binding protein, beta 1                       | 13620 | -0.029575 | -0.039537784 | 0.9882 | No |
| row_1138 | PHTF2    | putative homeodomain transcription factor 2                      | 13630 | -0.029941 | -0.039936822 | 0.9881 | No |
| row_1139 | ATP6V1B2 | ATPase, H+ transporting, lysosomal V1 subunit B2                 | 13637 | -0.030209 | -0.04019012  | 0.9880 | No |
| row_1140 | PTGER4   | prostaglandin E receptor 4 (subtype EP4)                         | 13664 | -0.031152 | -0.041411657 | 0.9876 | No |
| row_1141 | KATNA1   | katanin p60 (ATPase-containing) subunit A1                       | 13679 | -0.032141 | -0.04205032  | 0.9872 | No |
| row_1142 | PSMA1    | proteasome (prosome, macropain) subunit, alpha type 1            | 13681 | -0.032202 | -0.042058785 | 0.9872 | No |
| row_1143 | SEPW1    | selenoprotein W, muscle 1                                        | 13712 | -0.033833 | -0.04347088  | 0.9866 | No |
| row_1144 | YWHAZ    | tyrosine 3-monooxygenase/tryptophan 5-monooxygenase acti         | 13741 | -0.035438 | -0.044784036 | 0.9859 | No |
| row_1145 | RAD23B   | RAD23b homolog (S. cerevisiae)                                   | 13746 | -0.035658 | -0.04493362  | 0.9858 | No |
| row_1146 | DNAJA1   | DnaJ (Hsp40) homolog, subfamily A, member 1                      | 13758 | -0.036341 | -0.045421652 | 0.9856 | No |
| row_1147 | USP33    | ubiquitin specific peptidase 33                                  | 13761 | -0.036668 | -0.04547304  | 0.9854 | No |
| row_1148 | FADS2    | fatty acid desaturase 2                                          | 13775 | -0.037208 | -0.046056937 | 0.9836 | No |
| row_1149 | LATS2    | large tumor suppressor 2                                         | 13777 | -0.037237 | -0.046059147 | 0.9852 | No |
| row_1150 | MAPK6    | mitogen-activated protein kinase 6                               | 13786 | -0.037508 | -0.046400316 | 0.9851 | No |
| row_1151 | NDN      | Necdin                                                           | 13806 | -0.038384 | -0.047273576 | 0.9848 | No |
| row_1152 | RAB11A   | RAB11a, member RAS oncogene family                               | 13810 | -0.038622 | -0.04737101  | 0.9847 | No |
| row_1153 | GRB10    | growth factor receptor bound protein 10                          | 13814 | -0.038858 | -0.04746815  | 0.9846 | No |
| row_1154 | TPP2     | tripeptidyl peptidase II                                         | 13836 | -0.040191 | -0.048436105 | 0.9755 | No |
| row_1155 | NRAP     | nebulin-related anchoring protein                                | 13858 | -0.041479 | -0.049402464 | 0.9835 | No |
| row_1156 | NAP1L1   | nucleosome assembly protein 1-like 1                             | 13916 | -0.043721 | -0.05211098  | 0.9801 | No |
| row_1157 | GNS      | glucosamine (N-acetyl)-6-sulfatase                               | 13919 | -0.043827 | -0.052153476 | 0.9818 | No |

|          |         |                                                                 |       |           |              |        |    |
|----------|---------|-----------------------------------------------------------------|-------|-----------|--------------|--------|----|
| row_1158 | NAP1L1  | nucleosome assembly protein 1-like 1                            | 13920 | -0.043907 | -0.05209893  | 0.9826 | No |
| row_1159 | PAIP1   | polyadenylate binding protein-interacting protein 1             | 13946 | -0.045039 | -0.053254746 | 0.9814 | No |
| row_1160 | MYCT1   | myc target 1                                                    | 13948 | -0.045079 | -0.053247217 | 0.9783 | No |
| row_1161 | NFYA    | nuclear transcription factor-Y alpha                            | 13949 | -0.045150 | -0.053191125 | 0.9821 | No |
| row_1162 | YWHAE   | tyrosine 3-monooxygenase/tryptophan 5-monooxygenase acti        | 13951 | -0.045612 | -0.053182933 | 0.9819 | No |
| row_1163 | PUM2    | pumilio 2 (Drosophila)                                          | 13960 | -0.045917 | -0.053513657 | 0.9818 | No |
| row_1164 | ARL6IP1 | ADP-ribosylation factor-like 6 interacting protein 1            | 13972 | -0.046433 | -0.05398915  | 0.9816 | No |
| row_1165 | FECH    | ferrochelataase                                                 | 13990 | -0.047213 | -0.0547545   | 0.9813 | No |
| row_1166 | ZYX     | zyxin                                                           | 13992 | -0.047243 | -0.05474428  | 0.9813 | No |
| row_1167 | ITGA3   | integrin alpha 3                                                | 13995 | -0.047332 | -0.05478242  | 0.9812 | No |
| row_1168 | RNMT    | RNA (guanine-7-) methyltransferase                              | 14114 | -0.052007 | -0.060437363 | 0.9794 | No |
| row_1169 | OAS3    | 2'-5' oligoadenylate synthetase 3                               | 14133 | -0.052706 | -0.061244357 | 0.9781 | No |
| row_1170 | CFL1    | cofilin 1, non-muscle                                           | 14137 | -0.052846 | -0.06132412  | 0.9791 | No |
| row_1171 | MLF2    | myeloid leukemia factor 2                                       | 14148 | -0.053301 | -0.06174261  | 0.9789 | No |
| row_1172 | SMAP1   | stromal membrane-associated protein 1                           | 14196 | -0.055313 | -0.06395202  | 0.9781 | No |
| row_1173 | RNF11   | ring finger protein 11                                          | 14198 | -0.055362 | -0.06393172  | 0.9781 | No |
| row_1174 | TMOD3   | tropomodulin 3                                                  | 14200 | -0.055375 | -0.06391139  | 0.9704 | No |
| row_1175 | SLBP    | stem-loop binding protein                                       | 14239 | -0.056964 | -0.065682516 | 0.9775 | No |
| row_1176 | DBI     | diazepam binding inhibitor                                      | 14258 | -0.057568 | -0.066483475 | 0.9772 | No |
| row_1177 | TM4SF1  | transmembrane 4 superfamily member 1                            | 14268 | -0.057837 | -0.06684786  | 0.9771 | No |
| row_1178 | SS18    | synovial sarcoma translocation, Chromosome 18                   | 14281 | -0.058174 | -0.06735724  | 0.9770 | No |
| row_1179 | SNX5    | sorting nexin 5                                                 | 14285 | -0.058334 | -0.06743018  | 0.9769 | No |
| row_1180 | CTTN    | cortactin                                                       | 14289 | -0.058393 | -0.06750305  | 0.9769 | No |
| row_1181 | GTF2A1  | general transcription factor II A, 1                            | 14299 | -0.059042 | -0.067865945 | 0.9586 | No |
| row_1182 | PANK3   | pantothenate kinase 3                                           | 14327 | -0.060245 | -0.06909981  | 0.9676 | No |
| row_1183 | DDIT4   | DNA-damage-inducible transcript 4                               | 14328 | -0.060328 | -0.06902487  | 0.9657 | No |
| row_1184 | GAS2    | growth arrest specific 2                                        | 14346 | -0.060942 | -0.06977316  | 0.9705 | No |
| row_1185 | PECR    | peroxisomal trans-2-enoyl-CoA reductase                         | 14367 | -0.061801 | -0.0706658   | 0.9756 | No |
| row_1186 | ACBD6   | acyl-Coenzyme A binding domain containing 6                     | 14379 | -0.062658 | -0.07112114  | 0.9752 | No |
| row_1187 | GCNT2   | glucosaminyl (N-acetyl) transferase 2, I-branching enzyme       | 14391 | -0.063113 | -0.07157591  | 0.9750 | No |
| row_1188 | PTEN    | phosphatase and tensin homolog                                  | 14409 | -0.063977 | -0.07232043  | 0.9680 | No |
| row_1189 | RBM16   | RNA binding motif protein 16                                    | 14440 | -0.065428 | -0.073693275 | 0.9742 | No |
| row_1190 | API5    | apoptosis inhibitor 5                                           | 14449 | -0.065914 | -0.07399916  | 0.9740 | No |
| row_1191 | RTN4    | reticulon 4                                                     | 14483 | -0.067787 | -0.07551448  | 0.9732 | No |
| row_1192 | EDG1    | endothelial differentiation sphingolipid G-protein-coupled rece | 14491 | -0.068001 | -0.0757693   | 0.9732 | No |
| row_1193 | TXNRD1  | thioredoxin reductase 1                                         | 14492 | -0.068027 | -0.075684786 | 0.9732 | No |
| row_1194 | PAPOLA  | poly (A) polymerase alpha                                       | 14493 | -0.068032 | -0.075600274 | 0.9732 | No |
| row_1195 | PCDH7   | protocadherin 7                                                 | 14494 | -0.068069 | -0.07551571  | 0.9731 | No |
| row_1196 | IRAK1   | interleukin-1 receptor-associated kinase 1                      | 14500 | -0.068458 | -0.075673014 | 0.9730 | No |
| row_1197 | CEACAM1 | CEA-related cell adhesion molecule 1                            | 14529 | -0.069836 | -0.07694344  | 0.9659 | No |
| row_1198 | AP3S2   | adaptor-related protein complex 3, sigma 2 subunit              | 14535 | -0.070215 | -0.07709856  | 0.9723 | No |
| row_1199 | CHCHD4  | coiled-coil-helix-coiled-coil-helix domain containing 4         | 14537 | -0.070308 | -0.07705969  | 0.9723 | No |
| row_1200 | NDN     | necdin                                                          | 14549 | -0.070659 | -0.07750509  | 0.9586 | No |
| row_1201 | ABCE1   | ATP-binding cassette, sub-family E (OABP), member 1             | 14579 | -0.071869 | -0.07882146  | 0.9717 | No |
| row_1202 | NAP1L1  | nucleosome assembly protein 1-like 1                            | 14584 | -0.072008 | -0.078925885 | 0.9716 | No |
| row_1203 | NCL     | nucleolin                                                       | 14605 | -0.072799 | -0.07980487  | 0.9713 | No |
| row_1204 | IKBKG   | inhibitor of kappaB kinase gamma                                | 14606 | -0.072842 | -0.07971437  | 0.9686 | No |

|          |         |                                                                    |       |           |              |        |    |
|----------|---------|--------------------------------------------------------------------|-------|-----------|--------------|--------|----|
| row_1205 | HMGN1   | high mobility group nucleosomal binding domain 1                   | 14607 | -0.072850 | -0.07962387  | 0.9713 | No |
| row_1206 | RABGEF1 | RAB guanine nucleotide exchange factor (GEF) 1                     | 14608 | -0.072860 | -0.07953335  | 0.9713 | No |
| row_1207 | ASB4    | ankyrin repeat and SOCS box-containing protein 4                   | 14621 | -0.073540 | -0.08002365  | 0.9664 | No |
| row_1208 | TWSG1   | twisted gastrulation homolog 1 (Drosophila)                        | 14628 | -0.073817 | -0.08022277  | 0.9709 | No |
| row_1209 | DNAJA1  | DnaJ (Hsp40) homolog, subfamily A, member 1                        | 14666 | -0.075359 | -0.08192257  | 0.9703 | No |
| row_1210 | UBE1C   | ubiquitin-activating enzyme E1C                                    | 14670 | -0.075537 | -0.08197414  | 0.9702 | No |
| row_1211 | PTP4A2  | protein tyrosine phosphatase 4a2                                   | 14671 | -0.075614 | -0.081880204 | 0.9702 | No |
| row_1212 | HAT1    | histone aminotransferase 1                                         | 14675 | -0.075664 | -0.08193162  | 0.9702 | No |
| row_1213 | TRAF3   | Tnf receptor-associated factor 3                                   | 14685 | -0.075962 | -0.08227349  | 0.9701 | No |
| row_1214 | SLC6A6  | solute carrier family 6 (neurotransmitter transporter, taurine), r | 14751 | -0.078566 | -0.085326485 | 0.9506 | No |
| row_1215 | BZW1    | basic leucine zipper and W2 domains 1                              | 14754 | -0.078707 | -0.08532565  | 0.9690 | No |
| row_1216 | ABCE1   | ATP-binding cassette, sub-family E (OABP), member 1                | 14764 | -0.079203 | -0.08566349  | 0.9688 | No |
| row_1217 | RBPSUH  | recombining binding protein suppressor of hairless (Drosophila     | 14767 | -0.079489 | -0.08566169  | 0.9676 | No |
| row_1218 | IL6ST   | interleukin 6 signal transducer                                    | 14777 | -0.079869 | -0.0859987   | 0.9671 | No |
| row_1219 | SCML4   | sex comb on midleg-like 4 (Drosophila)                             | 14785 | -0.080204 | -0.086238354 | 0.9559 | No |
| row_1220 | CEPT1   | choline/ethanolaminephosphotransferase 1                           | 14815 | -0.081438 | -0.08754284  | 0.9679 | No |
| row_1221 | IL6ST   | interleukin 6 signal transducer                                    | 14834 | -0.082369 | -0.08831298  | 0.9676 | No |
| row_1222 | CCT3    | chaperonin subunit 3 (gamma)                                       | 14837 | -0.082580 | -0.088307336 | 0.9675 | No |
| row_1223 | GLA     | galactosidase, alpha                                               | 14856 | -0.083473 | -0.08907611  | 0.9672 | No |
| row_1224 | BRD1    | bromodomain containing 1                                           | 14883 | -0.084482 | -0.090231396 | 0.9668 | No |
| row_1225 | CEACAM1 | CEA-related cell adhesion molecule 1                               | 14913 | -0.085592 | -0.09153072  | 0.9352 | No |
| row_1226 | TRIM2   | tripartite motif protein 2                                         | 14920 | -0.086244 | -0.091714405 | 0.9661 | No |
| row_1227 | CLNS1A  | chloride channel, nucleotide-sensitive, 1A                         | 14921 | -0.086330 | -0.09160715  | 0.9661 | No |
| row_1228 | TRIM2   | tripartite motif protein 2                                         | 14936 | -0.087042 | -0.092177615 | 0.9491 | No |
| row_1229 | GHITM   | growth hormone inducible transmembrane protein                     | 14956 | -0.087912 | -0.09298934  | 0.9654 | No |
| row_1230 | DSG2    | desmoglein 2                                                       | 14957 | -0.087923 | -0.092880115 | 0.9654 | No |
| row_1231 | GFPT1   | glutamine fructose-6-phosphate transaminase 1                      | 14979 | -0.088829 | -0.09378765  | 0.9651 | No |
| row_1232 | CDC42   | cell division cycle 42 homolog (S. cerevisiae)                     | 14981 | -0.088866 | -0.09372572  | 0.9651 | No |
| row_1233 | STAM    | signal transducing adaptor molecule (SH3 domain and ITAM r         | 15022 | -0.090797 | -0.09555175  | 0.9643 | No |
| row_1234 | PRG2    | proteoglycan 2, bone marrow                                        | 15029 | -0.091184 | -0.0957293   | 0.8826 | No |
| row_1235 | PFN2    | profilin 2                                                         | 15035 | -0.091449 | -0.095858045 | 0.9391 | No |
| row_1236 | ZFX     | zinc finger protein X-linked                                       | 15036 | -0.091482 | -0.0957444   | 0.9585 | No |
| row_1237 | NUDT4   | nudix (nucleoside diphosphate linked moiety X)-type motif 4        | 15039 | -0.091676 | -0.09572745  | 0.9640 | No |
| row_1238 | MTCH2   | mitochondrial carrier homolog 2 (C. elegans)                       | 15053 | -0.092473 | -0.096242696 | 0.9590 | No |
| row_1239 | SFRS3   | splicing factor, arginine/serine-rich 3 (SRp20)                    | 15090 | -0.093902 | -0.09787098  | 0.9631 | No |
| row_1240 | TRAM1   | translocating chain-associating membrane protein 1                 | 15095 | -0.094072 | -0.097948    | 0.9631 | No |
| row_1241 | RALA    | v-ral simian leukemia viral oncogene homolog A (ras related)       | 15111 | -0.094597 | -0.09855755  | 0.9629 | No |
| row_1242 | GLTP    | glycolipid transfer protein                                        | 15119 | -0.094953 | -0.09877888  | 0.9627 | No |
| row_1243 | GRB10   | growth factor receptor bound protein 10                            | 15121 | -0.095045 | -0.09870928  | 0.9627 | No |
| row_1244 | RYK     | receptor-like tyrosine kinase                                      | 15127 | -0.095287 | -0.098833255 | 0.9495 | No |
| row_1245 | CCR2    | chemokine (C-C motif) receptor 2                                   | 15133 | -0.095455 | -0.098957025 | 0.9494 | No |
| row_1246 | H1F0    | H1 histone family, member 0                                        | 15136 | -0.095500 | -0.09893532  | 0.9625 | No |
| row_1247 | TLK2    | tousled-like kinase 2 (Arabidopsis)                                | 15154 | -0.096424 | -0.099639535 | 0.9622 | No |
| row_1248 | HP      | haptoglobin                                                        | 15165 | -0.096783 | -0.10000401  | 0.9108 | No |
| row_1249 | MTAP    | methylthioadenosine phosphorylase                                  | 15166 | -0.096817 | -0.099883735 | 0.9620 | No |
| row_1250 | EPS8    | epidermal growth factor receptor pathway substrate 8               | 15174 | -0.097219 | -0.10010225  | 0.9301 | No |
| row_1251 | ATP1A1  | ATPase, Na+/K+ transporting, alpha 1 polypeptide                   | 15189 | -0.098107 | -0.10065897  | 0.9615 | No |

|          |          |                                                              |       |           |              |        |    |
|----------|----------|--------------------------------------------------------------|-------|-----------|--------------|--------|----|
| row_1252 | KCMF1    | potassium channel modulatory factor 1                        | 15197 | -0.098350 | -0.100876085 | 0.9614 | No |
| row_1253 | ECHDC1   | enoyl Coenzyme A hydratase domain containing 1               | 15208 | -0.098793 | -0.10123806  | 0.9449 | No |
| row_1254 | DDR1     | discoidin domain receptor family, member 1                   | 15234 | -0.099741 | -0.10232592  | 0.9609 | No |
| row_1255 | BECN1    | Beclin 1 (coiled-coil, myosin-like BCL2-interacting protein) | 15236 | -0.099915 | -0.10225026  | 0.9608 | No |
| row_1256 | DAZAP2   | DAZ associated protein 2                                     | 15247 | -0.100495 | -0.102610126 | 0.9606 | No |
| row_1257 | RDX      | radixin                                                      | 15274 | -0.101506 | -0.10374427  | 0.9602 | No |
| row_1258 | TBL1X    | Transducin (beta)-like 1 X-linked                            | 15285 | -0.101970 | -0.1041023   | 0.9600 | No |
| row_1259 | SPRED1   | sprouty protein with EVH-1 domain 1, related sequence        | 15290 | -0.102200 | -0.10416922  | 0.9542 | No |
| row_1260 | TOP1     | topoisomerase (DNA) I                                        | 15292 | -0.102242 | -0.104090676 | 0.9599 | No |
| row_1261 | CENTD1   | Centaurin, delta 1                                           | 15297 | -0.102490 | -0.10415723  | 0.9598 | No |
| row_1262 | DDX10    | DEAD (Asp-Glu-Ala-Asp) box polypeptide 10                    | 15311 | -0.102977 | -0.10465942  | 0.9596 | No |
| row_1263 | KPNA1    | karyopherin (importin) alpha 1                               | 15314 | -0.103189 | -0.104628175 | 0.9508 | No |
| row_1264 | TLOC1    | translocation protein 1                                      | 15325 | -0.103601 | -0.10498418  | 0.9594 | No |
| row_1265 | MAP1LC3B | microtubule-associated protein 1 light chain 3 beta          | 15330 | -0.103760 | -0.105049156 | 0.9593 | No |
| row_1266 | ING3     | inhibitor of growth family, member 3                         | 15374 | -0.105142 | -0.10700278  | 0.9588 | No |
| row_1267 | SYNPO    | synaptopodin                                                 | 15425 | -0.107320 | -0.109293    | 0.9580 | No |
| row_1268 | CTCF     | CCCTC-binding factor                                         | 15437 | -0.107720 | -0.10969236  | 0.9578 | No |
| row_1269 | MAP2K5   | mitogen activated protein kinase kinase 5                    | 15440 | -0.107964 | -0.10965517  | 0.9577 | No |
| row_1270 | GPIAP1   | GPI-anchored membrane protein 1                              | 15441 | -0.108003 | -0.109521    | 0.9577 | No |
| row_1271 | SPTLC1   | serine palmitoyltransferase, long chain base subunit 1       | 15446 | -0.108142 | -0.10958054  | 0.9577 | No |
| row_1272 | IFRG15   | interferon alpha responsive gene                             | 15468 | -0.109168 | -0.1104628   | 0.9573 | No |
| row_1273 | CLCN3    | chloride channel 3                                           | 15472 | -0.109310 | -0.11047242  | 0.9572 | No |
| row_1274 | LGALS8   | lectin, galactose binding, soluble 8                         | 15475 | -0.109423 | -0.11043342  | 0.9572 | No |
| row_1275 | TRIM37   | tripartite motif protein 37                                  | 15476 | -0.109425 | -0.110297486 | 0.9572 | No |
| row_1276 | CSTF2    | cleavage stimulation factor, 3' pre-RNA subunit 2            | 15490 | -0.109954 | -0.110791005 | 0.9570 | No |
| row_1277 | UBE2J1   | ubiquitin-conjugating enzyme E2, J1                          | 15502 | -0.110324 | -0.11118713  | 0.9289 | No |
| row_1278 | PPP6C    | protein phosphatase 6, catalytic subunit                     | 15532 | -0.111681 | -0.11245404  | 0.9563 | No |
| row_1279 | CDYL     | chromodomain protein, Y chromosome-like                      | 15546 | -0.112329 | -0.11294461  | 0.9503 | No |
| row_1280 | KCTD9    | potassium channel tetramerisation domain containing 9        | 15547 | -0.112396 | -0.11280499  | 0.9560 | No |
| row_1281 | ARF3     | ADP-ribosylation factor 3                                    | 15560 | -0.113211 | -0.113245994 | 0.9557 | No |
| row_1282 | FKBP1A   | FK506 binding protein 1a                                     | 15568 | -0.113662 | -0.11344408  | 0.9555 | No |
| row_1283 | GAS2     | Growth arrest specific 2                                     | 15594 | -0.114796 | -0.11451324  | 0.9551 | No |
| row_1284 | RTN3     | reticulon 3                                                  | 15602 | -0.115088 | -0.11470956  | 0.9470 | No |
| row_1285 | LAPTM5   | lysosomal-associated protein transmembrane 5                 | 15610 | -0.115442 | -0.11490544  | 0.9549 | No |
| row_1286 | MAP2K1   | mitogen activated protein kinase kinase 1                    | 15616 | -0.115661 | -0.11500411  | 0.9548 | No |
| row_1287 | TIPARP   | TCDD-inducible poly(ADP-ribose) polymerase                   | 15621 | -0.116059 | -0.11505381  | 0.9546 | No |
| row_1288 | HMGB3    | high mobility group box 3                                    | 15627 | -0.116356 | -0.115151614 | 0.9545 | No |
| row_1289 | HSD17B12 | hydroxysteroid (17-beta) dehydrogenase 12                    | 15629 | -0.116401 | -0.11505548  | 0.9545 | No |
| row_1290 | TSNAX    | translin-associated factor X                                 | 15635 | -0.116581 | -0.11515301  | 0.9544 | No |
| row_1291 | EIF3S6   | eukaryotic translation initiation factor 3, subunit 6        | 15642 | -0.116812 | -0.11529872  | 0.9543 | No |
| row_1292 | GORASP2  | golgi reassembly stacking protein 2                          | 15645 | -0.116932 | -0.115250394 | 0.9543 | No |
| row_1293 | YME1L1   | YME1-like 1 (S. cerevisiae)                                  | 15651 | -0.117482 | -0.1153468   | 0.9541 | No |
| row_1294 | KIF5B    | kinesin family member 5B                                     | 15660 | -0.118065 | -0.11558789  | 0.9539 | No |
| row_1295 | CR11     | CREBBP/EP300 inhibitory protein 1                            | 15677 | -0.118721 | -0.11621594  | 0.9420 | No |
| row_1296 | RAB32    | RAB32, member RAS oncogene family                            | 15679 | -0.118883 | -0.11611672  | 0.9536 | No |
| row_1297 | ACADL    | acyl-Coenzyme A dehydrogenase, long-chain                    | 15684 | -0.119375 | -0.1161623   | 0.9534 | No |
| row_1298 | ZFR      | zinc finger RNA binding protein                              | 15721 | -0.120954 | -0.117756985 | 0.9528 | No |

|          |         |                                                                |       |           |              |        |    |
|----------|---------|----------------------------------------------------------------|-------|-----------|--------------|--------|----|
| row_1299 | LOX     | lysyl oxidase                                                  | 15722 | -0.121039 | -0.11760662  | 0.9527 | No |
| row_1300 | EMP2    | epithelial membrane protein 2                                  | 15729 | -0.121394 | -0.117746636 | 0.9526 | No |
| row_1301 | ARL6IP1 | ADP-ribosylation factor-like 6 interacting protein 1           | 15755 | -0.122828 | -0.11880581  | 0.9520 | No |
| row_1302 | PFN2    | profilin 2                                                     | 15762 | -0.123029 | -0.118943796 | 0.8980 | No |
| row_1303 | HNRPK   | Heterogeneous nuclear ribonucleoprotein K                      | 15766 | -0.123286 | -0.118936054 | 0.9519 | No |
| row_1304 | RUNX1   | runt related transcription factor 1                            | 15778 | -0.123939 | -0.11931526  | 0.9384 | No |
| row_1305 | SCOC    | short coiled-coil protein                                      | 15790 | -0.124403 | -0.11969389  | 0.9493 | No |
| row_1306 | SRRM1   | serine/arginine repetitive matrix 1                            | 15800 | -0.124698 | -0.11997522  | 0.9493 | No |
| row_1307 | ARF1    | ADP-ribosylation factor 1                                      | 15801 | -0.124763 | -0.11982022  | 0.9513 | No |
| row_1308 | FBXW7   | F-box and WD-40 domain protein 7, archipelago homolog (Dr      | 15808 | -0.125045 | -0.1199557   | 0.9419 | No |
| row_1309 | VAV3    | vav 3 oncogene                                                 | 15814 | -0.125319 | -0.120042376 | 0.9511 | No |
| row_1310 | HCLS1   | hematopoietic cell specific Lyn substrate 1                    | 15828 | -0.126122 | -0.120515816 | 0.9508 | No |
| row_1311 | RAB10   | RAB10, member RAS oncogene family                              | 15849 | -0.127169 | -0.121327244 | 0.9504 | No |
| row_1312 | HNRPM   | heterogeneous nuclear ribonucleoprotein M                      | 15851 | -0.127214 | -0.121217676 | 0.9504 | No |
| row_1313 | ANXA4   | annexin A4                                                     | 15864 | -0.127954 | -0.12164037  | 0.9501 | No |
| row_1314 | KIF3A   | kinesin family member 3A                                       | 15875 | -0.128547 | -0.121965386 | 0.9334 | No |
| row_1315 | SFRS3   | splicing factor, arginine/serine-rich 3 (SRp20)                | 15877 | -0.128573 | -0.12185413  | 0.9499 | No |
| row_1316 | PA2G4   | Proliferation-associated 2G4                                   | 15881 | -0.128693 | -0.121839665 | 0.9498 | No |
| row_1317 | UBE2D2  | ubiquitin-conjugating enzyme E2D 2                             | 15897 | -0.129160 | -0.12240627  | 0.9496 | No |
| row_1318 | NAB1    | Ngfi-A binding protein 1                                       | 15898 | -0.129192 | -0.12224577  | 0.9496 | No |
| row_1319 | CHIC2   | cysteine-rich hydrophobic domain 2                             | 15911 | -0.129844 | -0.12266612  | 0.9494 | No |
| row_1320 | LAPTM5  | lysosomal-associated protein transmembrane 5                   | 15917 | -0.130163 | -0.122746766 | 0.9493 | No |
| row_1321 | CD47    | CD47 antigen (Rh-related antigen, integrin-associated signal t | 15920 | -0.130231 | -0.12268192  | 0.9492 | No |
| row_1322 | RAP1B   | RAS related protein 1b                                         | 15966 | -0.132633 | -0.12469834  | 0.9483 | No |
| row_1323 | SH3BGRL | SH3-binding domain glutamic acid-rich protein like             | 15974 | -0.133025 | -0.12487238  | 0.9482 | No |
| row_1324 | ARF6    | ADP-ribosylation factor 6                                      | 15984 | -0.133363 | -0.12514293  | 0.9480 | No |
| row_1325 | CAPZA2  | capping protein (actin filament) muscle Z-line, alpha 2        | 15989 | -0.133424 | -0.12517107  | 0.9480 | No |
| row_1326 | UBE2D3  | ubiquitin-conjugating enzyme E2D 3 (UBC4/5 homolog, yeast      | 15999 | -0.133804 | -0.12544107  | 0.9479 | No |
| row_1327 | ETS1    | E26 avian leukemia oncogene 1, 5' domain                       | 16000 | -0.133840 | -0.1252748   | 0.9479 | No |
| row_1328 | USP14   | ubiquitin specific peptidase 14                                | 16023 | -0.134590 | -0.12617396  | 0.9476 | No |
| row_1329 | PRDX1   | peroxiredoxin 1                                                | 16037 | -0.135369 | -0.12663591  | 0.9473 | No |
| row_1330 | DDX3X   | DEAD/H (Asp-Glu-Ala-Asp/His) box polypeptide 3, X-linked       | 16053 | -0.136318 | -0.12719363  | 0.9469 | No |
| row_1331 | IKBKKG  | inhibitor of kappaB kinase gamma                               | 16061 | -0.137020 | -0.1273627   | 0.9467 | No |
| row_1332 | RNF11   | ring finger protein 11                                         | 16064 | -0.137144 | -0.12728927  | 0.9466 | No |
| row_1333 | DNAJB6  | DnaJ (Hsp40) homolog, subfamily B, member 6                    | 16074 | -0.137358 | -0.12755486  | 0.9465 | No |
| row_1334 | STX7    | syntaxin 7                                                     | 16086 | -0.138063 | -0.12791653  | 0.9463 | No |
| row_1335 | HMG1    | high mobility group nucleosomal binding domain 1               | 16109 | -0.139465 | -0.12880963  | 0.9457 | No |
| row_1336 | LAMP2   | lysosomal membrane glycoprotein 2                              | 16116 | -0.139792 | -0.12892678  | 0.9456 | No |
| row_1337 | UBE2N   | ubiquitin-conjugating enzyme E2N                               | 16134 | -0.140859 | -0.1295758   | 0.9452 | No |
| row_1338 | MCL1    | myeloid cell leukemia sequence 1                               | 16139 | -0.141300 | -0.12959415  | 0.9450 | No |
| row_1339 | FZD3    | frizzled homolog 3 (Drosophila)                                | 16165 | -0.142724 | -0.1306286   | 0.9337 | No |
| row_1340 | VPS54   | vacuolar protein sorting 54 (yeast)                            | 16176 | -0.143047 | -0.13093561  | 0.9444 | No |
| row_1341 | ARF3    | ADP-ribosylation factor 3                                      | 16183 | -0.143208 | -0.13104852  | 0.9443 | No |
| row_1342 | PRDX1   | peroxiredoxin 1                                                | 16212 | -0.144118 | -0.13222666  | 0.9440 | No |
| row_1343 | PVR     | poliovirus receptor                                            | 16227 | -0.144928 | -0.13272521  | 0.9280 | No |
| row_1344 | COTL1   | coactosin-like 1 (Dictyostelium)                               | 16231 | -0.145049 | -0.13269043  | 0.9436 | No |
| row_1345 | GNPNAT1 | Glucosamine-phosphate N-acetyltransferase 1                    | 16279 | -0.147678 | -0.13478509  | 0.9426 | No |

|          |          |                                                               |       |           |             |        |    |
|----------|----------|---------------------------------------------------------------|-------|-----------|-------------|--------|----|
| row_1346 | PICALM   | phosphatidylinositol binding clathrin assembly protein        | 16296 | -0.148253 | -0.13537645 | 0.9424 | No |
| row_1347 | GRB10    | growth factor receptor bound protein 10                       | 16297 | -0.148268 | -0.13519226 | 0.9424 | No |
| row_1348 | HSPA5    | heat shock 70kD protein 5 (glucose-regulated protein)         | 16304 | -0.148688 | -0.13529837 | 0.9422 | No |
| row_1349 | RBM16    | RNA binding motif protein 16                                  | 16316 | -0.149435 | -0.1356459  | 0.9195 | No |
| row_1350 | HRSP12   | heat-responsive protein 12                                    | 16320 | -0.149623 | -0.13560544 | 0.9419 | No |
| row_1351 | RAC1     | RAS-related C3 botulinum substrate 1                          | 16331 | -0.150115 | -0.13590366 | 0.9417 | No |
| row_1352 | ARHGAP18 | Rho GTPase activating protein 18                              | 16343 | -0.150673 | -0.13624965 | 0.9415 | No |
| row_1353 | ARF2     | ADP-ribosylation factor 2                                     | 16353 | -0.151027 | -0.13649827 | 0.8504 | No |
| row_1354 | SFRS1    | splicing factor, arginine/serine-rich 1 (ASF/SF2)             | 16354 | -0.151039 | -0.13631064 | 0.9414 | No |
| row_1355 | HMGN1    | high mobility group nucleosomal binding domain 1              | 16370 | -0.152015 | -0.13684884 | 0.9410 | No |
| row_1356 | YWHAZ    | tyrosine 3-monooxygenase/tryptophan 5-monooxygenase acti      | 16379 | -0.152671 | -0.13704695 | 0.9407 | No |
| row_1357 | SOAT1    | sterol O-acyltransferase 1                                    | 16406 | -0.153859 | -0.13811605 | 0.8777 | No |
| row_1358 | PLEKHC1  | pleckstrin homology domain containing, family C (with FERM)   | 16461 | -0.156457 | -0.1405391  | 0.9393 | No |
| row_1359 | IL1RAP   | interleukin 1 receptor accessory protein                      | 16488 | -0.157800 | -0.1416033  | 0.8740 | No |
| row_1360 | VAT1     | vesicle amine transport protein 1 homolog (T californica)     | 16506 | -0.158998 | -0.14222978 | 0.9384 | No |
| row_1361 | MTMR6    | myotubularin related protein 6                                | 16510 | -0.159184 | -0.14217743 | 0.9383 | No |
| row_1362 | ABCC5    | ATP-binding cassette, sub-family C (CFTR/MRP), member 5       | 16514 | -0.159458 | -0.14212476 | 0.9259 | No |
| row_1363 | NCL      | nucleolin                                                     | 16521 | -0.160038 | -0.14221677 | 0.9380 | No |
| row_1364 | CCNB1    | cyclin B1                                                     | 16524 | -0.160088 | -0.14211483 | 0.9380 | No |
| row_1365 | MEF2C    | myocyte enhancer factor 2C                                    | 16527 | -0.160260 | -0.14201269 | 0.9379 | No |
| row_1366 | MAN2A1   | mannosidase 2, alpha 1                                        | 16531 | -0.160452 | -0.14195876 | 0.9378 | No |
| row_1367 | DDX46    | DEAD (Asp-Glu-Ala-Asp) box polypeptide 46                     | 16545 | -0.161248 | -0.14238857 | 0.8999 | No |
| row_1368 | ALCAM    | activated leukocyte cell adhesion molecule                    | 16553 | -0.161702 | -0.14252697 | 0.9070 | No |
| row_1369 | ETF1     | eukaryotic translation termination factor 1                   | 16562 | -0.162080 | -0.14271338 | 0.9372 | No |
| row_1370 | HMGCS1   | 3-hydroxy-3-methylglutaryl-Coenzyme A synthase 1              | 16571 | -0.162435 | -0.14289936 | 0.9071 | No |
| row_1371 | HNRPU    | heterogeneous nuclear ribonucleoprotein U                     | 16574 | -0.162485 | -0.14279445 | 0.9371 | No |
| row_1372 | GCNT2    | glucosaminyl (N-acetyl) transferase 2, I-branching enzyme     | 16602 | -0.164017 | -0.1438994  | 0.9365 | No |
| row_1373 | TSN      | translin                                                      | 16610 | -0.164502 | -0.14403434 | 0.9363 | No |
| row_1374 | NAP1L1   | nucleosome assembly protein 1-like 1                          | 16616 | -0.164983 | -0.14407173 | 0.9361 | No |
| row_1375 | MAP2K4   | mitogen activated protein kinase kinase 4                     | 16624 | -0.165372 | -0.14420559 | 0.9276 | No |
| row_1376 | MGAT2    | mannoside acetylglucosaminyltransferase 2                     | 16625 | -0.165482 | -0.14400001 | 0.9318 | No |
| row_1377 | ITPR1    | inositol 1,4,5-triphosphate receptor 1                        | 16626 | -0.165574 | -0.14379431 | 0.9359 | No |
| row_1378 | AHCYL1   | S-adenosylhomocysteine hydrolase-like 1                       | 16639 | -0.166101 | -0.14416961 | 0.9357 | No |
| row_1379 | MSH2     | mutS homolog 2 (E. coli)                                      | 16650 | -0.166532 | -0.14444743 | 0.9355 | No |
| row_1380 | CFL1     | cofilin 1, non-muscle                                         | 16651 | -0.166543 | -0.14424054 | 0.9355 | No |
| row_1381 | PVR      | poliovirus receptor                                           | 16659 | -0.167138 | -0.1443722  | 0.9353 | No |
| row_1382 | ITGA3    | integrin alpha 3                                              | 16674 | -0.167891 | -0.14484222 | 0.9350 | No |
| row_1383 | CCR2     | chemokine (C-C motif) receptor 2                              | 16692 | -0.169134 | -0.1454561  | 0.9261 | No |
| row_1384 | WDR26    | WD repeat domain 26                                           | 16715 | -0.170111 | -0.14631113 | 0.9213 | No |
| row_1385 | RAB10    | RAB10, member RAS oncogene family                             | 16717 | -0.170231 | -0.14614813 | 0.9054 | No |
| row_1386 | PPP2R1A  | protein phosphatase 2 (formerly 2A), regulatory subunit A (PR | 16719 | -0.170309 | -0.14598502 | 0.9341 | No |
| row_1387 | PPP2R5C  | protein phosphatase 2, regulatory subunit B (B56), gamma isc  | 16736 | -0.170928 | -0.14654821 | 0.9339 | No |
| row_1388 | DNAJB6   | DnaJ (Hsp40) homolog, subfamily B, member 6                   | 16747 | -0.171448 | -0.14681993 | 0.9246 | No |
| row_1389 | FBXL14   | F-box and leucine-rich repeat protein 14                      | 16760 | -0.172682 | -0.14718705 | 0.9332 | No |
| row_1390 | OXR1     | oxidation resistance 1                                        | 16762 | -0.172742 | -0.14702092 | 0.9332 | No |
| row_1391 | PDHA1    | pyruvate dehydrogenase E1 alpha 1                             | 16779 | -0.173664 | -0.14758071 | 0.9306 | No |
| row_1392 | CALM2    | calmodulin 2                                                  | 16787 | -0.174171 | -0.14770363 | 0.9327 | No |

|          |         |                                                                  |       |           |             |        |    |
|----------|---------|------------------------------------------------------------------|-------|-----------|-------------|--------|----|
| row_1393 | NAP1L1  | nucleosome assembly protein 1-like 1                             | 16788 | -0.174295 | -0.1474871  | 0.9326 | No |
| row_1394 | NPM1    | nucleophosmin 1                                                  | 16789 | -0.174295 | -0.14727058 | 0.9326 | No |
| row_1395 | GNPNAT1 | glucosamine-phosphate N-acetyltransferase 1                      | 16800 | -0.174918 | -0.14753799 | 0.9324 | No |
| row_1396 | ING3    | inhibitor of growth family, member 3                             | 16802 | -0.174967 | -0.1473691  | 0.9324 | No |
| row_1397 | PSMD1   | Proteasome (prosome, macropain) 26S subunit, non-ATPase          | 16804 | -0.174989 | -0.14720018 | 0.9324 | No |
| row_1398 | ENTPD2  | ectonucleoside triphosphate diphosphohydrolase 2                 | 16806 | -0.175096 | -0.14703113 | 0.9232 | No |
| row_1399 | NFX1    | nuclear transcription factor, X-box binding 1                    | 16815 | -0.175684 | -0.14720064 | 0.9158 | No |
| row_1400 | CPOX    | coproporphyrinogen oxidase                                       | 16832 | -0.176260 | -0.1477572  | 0.9296 | No |
| row_1401 | CKS2    | CDC28 protein kinase regulatory subunit 2                        | 16842 | -0.176955 | -0.14797361 | 0.9316 | No |
| row_1402 | GLCC1   | glucocorticoid induced transcript 1                              | 16849 | -0.177288 | -0.14804418 | 0.9315 | No |
| row_1403 | ITPR1   | inositol 1,4,5-triphosphate receptor 1                           | 16850 | -0.177401 | -0.14782381 | 0.9210 | No |
| row_1404 | TLOC1   | translocation protein 1                                          | 16873 | -0.178419 | -0.14866851 | 0.9311 | No |
| row_1405 | MYNN    | myoneurin                                                        | 16892 | -0.179711 | -0.14931773 | 0.9306 | No |
| row_1406 | CYB561  | cytochrome b-561                                                 | 16895 | -0.179810 | -0.14919129 | 0.8727 | No |
| row_1407 | TRIM16  | tripartite motif protein 16                                      | 16901 | -0.180237 | -0.14920974 | 0.8866 | No |
| row_1408 | MTPN    | myotrophin                                                       | 16903 | -0.180497 | -0.14903398 | 0.9303 | No |
| row_1409 | PDHA1   | pyruvate dehydrogenase E1 alpha 1                                | 16905 | -0.180568 | -0.14885813 | 0.9303 | No |
| row_1410 | ROD1    | ROD1 regulator of differentiation 1 (S. pombe)                   | 16907 | -0.180680 | -0.14868213 | 0.8846 | No |
| row_1411 | XPO7    | exportin 7                                                       | 16919 | -0.181422 | -0.14898993 | 0.9300 | No |
| row_1412 | CNOT7   | CCR4-NOT transcription complex, subunit 7                        | 16927 | -0.182138 | -0.14910296 | 0.9254 | No |
| row_1413 | DUSP16  | dual specificity phosphatase 16                                  | 16937 | -0.183158 | -0.14931166 | 0.9202 | No |
| row_1414 | SLC16A1 | solute carrier family 16 (monocarboxylic acid transporters), mem | 16939 | -0.183282 | -0.14913245 | 0.9075 | No |
| row_1415 | EIF3S6  | eukaryotic translation initiation factor 3, subunit 6            | 16941 | -0.183363 | -0.14895312 | 0.9292 | No |
| row_1416 | ZYX     | zyxin                                                            | 16943 | -0.183465 | -0.14877367 | 0.9292 | No |
| row_1417 | UBE2D3  | ubiquitin-conjugating enzyme E2D 3 (UBC4/5 homolog, yeast        | 16969 | -0.184821 | -0.14975584 | 0.9287 | No |
| row_1418 | FBNP1   | formin binding protein 1                                         | 16972 | -0.184989 | -0.14962296 | 0.9131 | No |
| row_1419 | CCNB1   | cyclin B1                                                        | 16973 | -0.185043 | -0.14939308 | 0.9286 | No |
| row_1420 | TFAM    | transcription factor A, mitochondrial                            | 16979 | -0.185488 | -0.149405   | 0.9285 | No |
| row_1421 | STK24   | serine/threonine kinase 24 (STE20 homolog, yeast)                | 16990 | -0.185852 | -0.14965883 | 0.9283 | No |
| row_1422 | NCL     | nucleolin                                                        | 16998 | -0.186112 | -0.14976692 | 0.9282 | No |
| row_1423 | HNRPAB  | heterogeneous nuclear ribonucleoprotein A/B                      | 17001 | -0.186292 | -0.14963242 | 0.9282 | No |
| row_1424 | UBE2D3  | ubiquitin-conjugating enzyme E2D 3 (UBC4/5 homolog, yeast        | 17008 | -0.186855 | -0.14969112 | 0.9280 | No |
| row_1425 | UBE2D3  | ubiquitin-conjugating enzyme E2D 3 (UBC4/5 homolog, yeast        | 17012 | -0.187058 | -0.14960416 | 0.9279 | No |
| row_1426 | APLP2   | amyloid beta (A4) precursor-like protein 2                       | 17019 | -0.187528 | -0.149662   | 0.9247 | No |
| row_1427 | TCEB1   | transcription elongation factor B (SIII), polypeptide 1          | 17030 | -0.188294 | -0.14991279 | 0.9274 | No |
| row_1428 | ATP6AP2 | ATPase, H+ transporting, lysosomal accessory protein 2           | 17049 | -0.189656 | -0.15054967 | 0.9269 | No |
| row_1429 | TCEB1   | transcription elongation factor B (SIII), polypeptide 1          | 17076 | -0.191075 | -0.15157253 | 0.9264 | No |
| row_1430 | SFRS10  | splicing factor, arginine/serine-rich 10 (transformer 2 homolog  | 17077 | -0.191131 | -0.15133509 | 0.9264 | No |
| row_1431 | RAP1B   | RAS related protein 1b                                           | 17088 | -0.191891 | -0.1515814  | 0.9261 | No |
| row_1432 | CKS2    | CDC28 protein kinase regulatory subunit 2                        | 17115 | -0.193439 | -0.15260133 | 0.9255 | No |
| row_1433 | HNRPU   | heterogeneous nuclear ribonucleoprotein U                        | 17118 | -0.193587 | -0.15245779 | 0.9255 | No |
| row_1434 | PPM1B   | protein phosphatase 1B, magnesium dependent, beta isoform        | 17120 | -0.193642 | -0.1522657  | 0.9254 | No |
| row_1435 | TRIM16  | tripartite motif protein 16                                      | 17128 | -0.194150 | -0.15236379 | 0.9252 | No |
| row_1436 | KIFAP3  | kinesin-associated protein 3                                     | 17143 | -0.194856 | -0.1528003  | 0.9250 | No |
| row_1437 | LATS2   | large tumor suppressor 2                                         | 17168 | -0.196490 | -0.15371951 | 0.9244 | No |
| row_1438 | CD81    | CD 81 antigen                                                    | 17194 | -0.197737 | -0.15468563 | 0.9239 | No |
| row_1439 | EHD3    | EH-domain containing 3                                           | 17202 | -0.198126 | -0.1547788  | 0.8952 | No |



|          |          |                                                              |       |           |             |        |    |
|----------|----------|--------------------------------------------------------------|-------|-----------|-------------|--------|----|
| row_1440 | ELTD1    | EGF, latrophilin seven transmembrane domain containing 1     | 17204 | -0.198221 | -0.15458101 | 0.9237 | No |
| row_1441 | CLTC     | clathrin, heavy polypeptide (Hc)                             | 17217 | -0.198899 | -0.15491557 | 0.9235 | No |
| row_1442 | EIF5     | eukaryotic translation initiation factor 5                   | 17235 | -0.199690 | -0.1554915  | 0.9232 | No |
| row_1443 | CAPN7    | calpain 7                                                    | 17244 | -0.200304 | -0.15563042 | 0.9230 | No |
| row_1444 | BZW1     | basic leucine zipper and W2 domains 1                        | 17247 | -0.200413 | -0.15547839 | 0.9229 | No |
| row_1445 | NAP1L1   | nucleosome assembly protein 1-like 1                         | 17285 | -0.202158 | -0.15702067 | 0.9223 | No |
| row_1446 | ATP5A1   | ATP synthase, H+ transporting, mitochondrial F1 complex, al  | 17300 | -0.202856 | -0.15744725 | 0.9220 | No |
| row_1447 | HMGB1    | high mobility group box 1                                    | 17317 | -0.203891 | -0.15796949 | 0.9216 | No |
| row_1448 | LCP1     | lymphocyte cytosolic protein 1                               | 17330 | -0.205563 | -0.15829577 | 0.9210 | No |
| row_1449 | ATP6V1B2 | ATPase, H+ transporting, lysosomal V1 subunit B2             | 17340 | -0.206142 | -0.1584759  | 0.9208 | No |
| row_1450 | HRB      | HIV-1 Rev binding protein                                    | 17344 | -0.206354 | -0.15836497 | 0.8749 | No |
| row_1451 | NCL      | nucleolin                                                    | 17350 | -0.206779 | -0.15835044 | 0.9206 | No |
| row_1452 | ATP6V1B2 | ATPase, H+ transporting, lysosomal V1 subunit B2             | 17361 | -0.207334 | -0.15857758 | 0.9204 | No |
| row_1453 | MYCBP    | c-myc binding protein                                        | 17365 | -0.207613 | -0.15846507 | 0.9203 | No |
| row_1454 | SRPRB    | signal recognition particle receptor, B subunit              | 17421 | -0.210963 | -0.16086888 | 0.9190 | No |
| row_1455 | TBC1D15  | TBC1 domain family, member 15                                | 17455 | -0.212777 | -0.16220409 | 0.9184 | No |
| row_1456 | USP9X    | ubiquitin specific peptidase 9, X chromosome                 | 17466 | -0.213383 | -0.1624237  | 0.8739 | No |
| row_1457 | SFRS3    | splicing factor, arginine/serine-rich 3 (SRp20)              | 17473 | -0.213827 | -0.1624489  | 0.9180 | No |
| row_1458 | MGEA5    | meningioma expressed antigen 5 (hyaluronidase)               | 17474 | -0.213875 | -0.1621832  | 0.9180 | No |
| row_1459 | PAK1     | p21 (CDKN1A)-activated kinase 1                              | 17482 | -0.214323 | -0.16225624 | 0.9178 | No |
| row_1460 | ITGAV    | integrin alpha V                                             | 17488 | -0.214885 | -0.16223164 | 0.9176 | No |
| row_1461 | TAX1BP1  | Tax1 (human T-cell leukemia virus type I) binding protein 1  | 17501 | -0.215810 | -0.16254519 | 0.9172 | No |
| row_1462 | SLC31A1  | solute carrier family 31, member 1                           | 17517 | -0.216705 | -0.16300303 | 0.9138 | No |
| row_1463 | SGPL1    | sphingosine phosphate lyase 1                                | 17518 | -0.216749 | -0.16273376 | 0.9169 | No |
| row_1464 | HMGCS1   | 3-hydroxy-3-methylglutaryl-Coenzyme A synthase 1             | 17539 | -0.217795 | -0.16343261 | 0.9165 | No |
| row_1465 | HPCAL1   | hippocalcin-like 1                                           | 17545 | -0.218205 | -0.1634039  | 0.9164 | No |
| row_1466 | SFRS3    | splicing factor, arginine/serine-rich 3 (SRp20)              | 17547 | -0.218396 | -0.16318105 | 0.9163 | No |
| row_1467 | KIF1B    | kinesin family member 1B                                     | 17549 | -0.218592 | -0.16295797 | 0.8727 | No |
| row_1468 | MGEA5    | meningioma expressed antigen 5 (hyaluronidase)               | 17553 | -0.218825 | -0.16283153 | 0.9161 | No |
| row_1469 | VAMP3    | vesicle-associated membrane protein 3                        | 17561 | -0.219324 | -0.16289836 | 0.9160 | No |
| row_1470 | BAZ1B    | bromodomain adjacent to zinc finger domain, 1B               | 17563 | -0.219462 | -0.16267419 | 0.9159 | No |
| row_1471 | SLC23A2  | solute carrier family 23 (nucleobase transporters), member 2 | 17565 | -0.219499 | -0.16244997 | 0.9159 | No |
| row_1472 | GPIAP1   | GPI-anchored membrane protein 1                              | 17575 | -0.219863 | -0.16261308 | 0.9143 | No |
| row_1473 | KIT      | kit oncogene                                                 | 17581 | -0.220346 | -0.1625817  | 0.9156 | No |
| row_1474 | TXNDC1   | thioredoxin domain containing 1                              | 17588 | -0.220778 | -0.16259825 | 0.9154 | No |
| row_1475 | MAP2K7   | mitogen activated protein kinase kinase 7                    | 17624 | -0.223477 | -0.1640171  | 0.9144 | No |
| row_1476 | ARPC4    | actin related protein 2/3 complex, subunit 4                 | 17626 | -0.223572 | -0.16378783 | 0.9144 | No |
| row_1477 | SRRM1    | serine/arginine repetitive matrix 1                          | 17628 | -0.223593 | -0.16355853 | 0.8902 | No |
| row_1478 | HNRPK    | heterogeneous nuclear ribonucleoprotein K                    | 17637 | -0.224165 | -0.16366781 | 0.9142 | No |
| row_1479 | PTGER4   | prostaglandin E receptor 4 (subtype EP4)                     | 17662 | -0.225590 | -0.16455086 | 0.9137 | No |
| row_1480 | IVNS1ABP | influenza virus NS1A binding protein                         | 17669 | -0.226160 | -0.16456072 | 0.8950 | No |
| row_1481 | RPL30    | ribosomal protein L30                                        | 17671 | -0.226241 | -0.16432813 | 0.9134 | No |
| row_1482 | RALA     | v-ral simian leukemia viral oncogene homolog A (ras related) | 17688 | -0.227350 | -0.16482122 | 0.8383 | No |
| row_1483 | RIOK2    | RIO kinase 2 (yeast)                                         | 17696 | -0.227720 | -0.16487762 | 0.9129 | No |
| row_1484 | ACTR3    | ARP3 actin-related protein 3 homolog (yeast)                 | 17718 | -0.228939 | -0.1656111  | 0.9124 | No |
| row_1485 | CCT6A    | chaperonin subunit 6a (zeta)                                 | 17732 | -0.230078 | -0.1659554  | 0.9120 | No |
| row_1486 | MTCH2    | mitochondrial carrier homolog 2 (C. elegans)                 | 17744 | -0.230674 | -0.16620201 | 0.9110 | No |

|          |          |                                                                    |       |           |             |        |    |
|----------|----------|--------------------------------------------------------------------|-------|-----------|-------------|--------|----|
| row_1487 | FMO5     | flavin containing monooxygenase 5                                  | 17747 | -0.231087 | -0.16601187 | 0.9061 | No |
| row_1488 | GLRX2    | glutaredoxin 2 (thioltransferase)                                  | 17749 | -0.231129 | -0.1657732  | 0.9116 | No |
| row_1489 | AP3S2    | adaptor-related protein complex 3, sigma 2 subunit                 | 17756 | -0.231508 | -0.16577643 | 0.9115 | No |
| row_1490 | CCNH     | cyclin H                                                           | 17758 | -0.231664 | -0.1655371  | 0.8895 | No |
| row_1491 | PUM2     | pumilio 2 (Drosophila)                                             | 17762 | -0.231702 | -0.16539466 | 0.9114 | No |
| row_1492 | TPD52    | tumor protein D52                                                  | 17767 | -0.232011 | -0.16530032 | 0.8957 | No |
| row_1493 | RAB7     | RAB7, member RAS oncogene family                                   | 17778 | -0.232483 | -0.16549622 | 0.9111 | No |
| row_1494 | WEE1     | wee 1 homolog (S. pombe)                                           | 17781 | -0.232695 | -0.16530408 | 0.8784 | No |
| row_1495 | ARF2     | ADP-ribosylation factor 2                                          | 17784 | -0.232956 | -0.16511162 | 0.8290 | No |
| row_1496 | PSMB7    | proteasome (prosome, macropain) subunit, beta type 7               | 17787 | -0.233063 | -0.16491902 | 0.9109 | No |
| row_1497 | DBI      | diazepam binding inhibitor                                         | 17810 | -0.234384 | -0.1656942  | 0.9104 | No |
| row_1498 | NONO     | non-POU-domain-containing, octamer binding protein                 | 17811 | -0.234396 | -0.16540301 | 0.9104 | No |
| row_1499 | BXDC1    | brix domain containing 1                                           | 17827 | -0.235000 | -0.16583814 | 0.9102 | No |
| row_1500 | PLEK     | pleckstrin                                                         | 17830 | -0.235162 | -0.16564293 | 0.9076 | No |
| row_1501 | KPNA3    | karyopherin (importin) alpha 3                                     | 17845 | -0.235891 | -0.16602848 | 0.9029 | No |
| row_1502 | SLCO2A1  | solute carrier organic anion transporter family, member 2a1        | 17846 | -0.235931 | -0.16573538 | 0.9099 | No |
| row_1503 | RASSF3   | Ras association (RalGDS/AF-6) domain family 3                      | 17848 | -0.235999 | -0.16549067 | 0.9093 | No |
| row_1504 | DNAJB6   | DnaJ (Hsp40) homolog, subfamily B, member 6                        | 17864 | -0.236896 | -0.16592343 | 0.8943 | No |
| row_1505 | KPNA1    | karyopherin (importin) alpha 1                                     | 17866 | -0.237041 | -0.16567743 | 0.8433 | No |
| row_1506 | AKAP9    | A kinase (PRKA) anchor protein (yotiao) 9                          | 17877 | -0.237650 | -0.1658669  | 0.8340 | No |
| row_1507 | RNF13    | ring finger protein 13                                             | 17886 | -0.238277 | -0.16595866 | 0.8527 | No |
| row_1508 | TRIM24   | tripartite motif protein 24                                        | 17891 | -0.238659 | -0.16585605 | 0.9089 | No |
| row_1509 | SRRM1    | serine/arginine repetitive matrix 1                                | 17900 | -0.239223 | -0.16594663 | 0.9087 | No |
| row_1510 | HIF1A    | hypoxia inducible factor 1, alpha subunit                          | 17909 | -0.239786 | -0.16603652 | 0.9085 | No |
| row_1511 | ATP6V1C1 | ATPase, H+ transporting, lysosomal V1 subunit C1                   | 17911 | -0.239863 | -0.165787   | 0.9010 | No |
| row_1512 | ELOVL5   | ELOVL family member 5, elongation of long chain fatty acids (      | 17918 | -0.240673 | -0.16577883 | 0.9082 | No |
| row_1513 | MAP2K7   | mitogen activated protein kinase kinase 7                          | 17924 | -0.241466 | -0.16572121 | 0.9079 | No |
| row_1514 | MCL1     | myeloid cell leukemia sequence 1                                   | 17927 | -0.241679 | -0.16551791 | 0.9078 | No |
| row_1515 | TLE3     | transducin-like enhancer of split 3, homolog of Drosophila E(s     | 17944 | -0.242277 | -0.16599247 | 0.8990 | No |
| row_1516 | VPS54    | vacuolar protein sorting 54 (yeast)                                | 17950 | -0.242741 | -0.16593327 | 0.9074 | No |
| row_1517 | STRN3    | striatin, calmodulin binding protein 3                             | 17973 | -0.243702 | -0.16669688 | 0.9070 | No |
| row_1518 | ZBTB1    | zinc finger and BTB domain containing 1                            | 17977 | -0.243813 | -0.16653939 | 0.9070 | No |
| row_1519 | PPP2R1A  | protein phosphatase 2 (formerly 2A), regulatory subunit A (PR      | 18001 | -0.245960 | -0.16734867 | 0.9062 | No |
| row_1520 | UBE1C    | ubiquitin-activating enzyme E1C                                    | 18019 | -0.247338 | -0.1678654  | 0.8830 | No |
| row_1521 | GNPNAT1  | glucosamine-phosphate N-acetyltransferase 1                        | 18026 | -0.247631 | -0.16784859 | 0.9056 | No |
| row_1522 | UBE2D3   | ubiquitin-conjugating enzyme E2D 3 (UBC4/5 homolog, yeast          | 18027 | -0.247657 | -0.16754092 | 0.9056 | No |
| row_1523 | GRSF1    | G-rich RNA sequence binding factor 1                               | 18028 | -0.247670 | -0.16723324 | 0.9056 | No |
| row_1524 | PSME4    | proteasome (prosome, macropain) activator subunit 4                | 18037 | -0.248220 | -0.16731265 | 0.9054 | No |
| row_1525 | CRK      | v-crk sarcoma virus CT10 oncogene homolog (avian)                  | 18058 | -0.249139 | -0.16797255 | 0.9051 | No |
| row_1526 | RUNX1    | runt related transcription factor 1                                | 18065 | -0.249794 | -0.16795306 | 0.9048 | No |
| row_1527 | SLC6A6   | Solute carrier family 6 (neurotransmitter transporter, taurine), I | 18071 | -0.250024 | -0.16788481 | 0.9048 | No |
| row_1528 | SCOC     | short coiled-coil protein                                          | 18126 | -0.253606 | -0.17018718 | 0.8813 | No |
| row_1529 | UCHL5    | ubiquitin carboxyl-terminal esterase L5                            | 18146 | -0.255315 | -0.17079094 | 0.9028 | No |
| row_1530 | ELTD1    | EGF, latrophilin seven transmembrane domain containing 1           | 18159 | -0.256157 | -0.17105436 | 0.9025 | No |
| row_1531 | HMMR     | hyaluronan mediated motility receptor (RHAMM)                      | 18162 | -0.256499 | -0.17083266 | 0.8606 | No |
| row_1532 | PPP2CA   | protein phosphatase 2 (formerly 2A), catalytic subunit, alpha is   | 18174 | -0.257265 | -0.17104624 | 0.9021 | No |
| row_1533 | ARL1     | ADP-ribosylation factor-like 1                                     | 18189 | -0.258037 | -0.17140427 | 0.9019 | No |

|          |         |                                                                |       |           |             |        |    |
|----------|---------|----------------------------------------------------------------|-------|-----------|-------------|--------|----|
| row_1534 | SMARCA2 | SWI/SNF related, matrix associated, actin dependent regulatc   | 18191 | -0.258220 | -0.17113195 | 0.9018 | No |
| row_1535 | CAPN7   | calpain 7                                                      | 18194 | -0.258474 | -0.17090778 | 0.9017 | No |
| row_1536 | LYST    | lysosomal trafficking regulator                                | 18212 | -0.259758 | -0.1714091  | 0.9012 | No |
| row_1537 | ATP6AP2 | ATPase, H+ transporting, lysosomal accessory protein 2         | 18226 | -0.260993 | -0.17171498 | 0.9008 | No |
| row_1538 | UGP2    | UDP-glucose pyrophosphorylase 2                                | 18227 | -0.260998 | -0.17139074 | 0.9008 | No |
| row_1539 | GOLPH3  | golgi phosphoprotein 3                                         | 18234 | -0.261533 | -0.17135666 | 0.9006 | No |
| row_1540 | TLK2    | tousled-like kinase 2 (Arabidopsis)                            | 18236 | -0.261672 | -0.17108005 | 0.8750 | No |
| row_1541 | CANX    | calnexin                                                       | 18242 | -0.261881 | -0.17099707 | 0.9005 | No |
| row_1542 | RORA    | RAR-related orphan receptor alpha                              | 18261 | -0.262922 | -0.17154293 | 0.9001 | No |
| row_1543 | RORA    | RAR-related orphan receptor alpha                              | 18264 | -0.263082 | -0.17131303 | 0.9000 | No |
| row_1544 | PA2G4   | proliferation-associated 2G4                                   | 18294 | -0.264862 | -0.17238964 | 0.8994 | No |
| row_1545 | ACP1    | acid phosphatase 1, soluble                                    | 18304 | -0.265553 | -0.17249599 | 0.8991 | No |
| row_1546 | GPIAP1  | GPI-anchored membrane protein 1                                | 18306 | -0.265652 | -0.17221443 | 0.8991 | No |
| row_1547 | HIPK3   | homeodomain interacting protein kinase 3                       | 18307 | -0.265714 | -0.17188434 | 0.8662 | No |
| row_1548 | RAB2    | RAB2, member RAS oncogene family                               | 18310 | -0.265869 | -0.17165099 | 0.8990 | No |
| row_1549 | CSNK2A1 | casein kinase II, alpha 1 polypeptide                          | 18330 | -0.267381 | -0.17223977 | 0.8392 | No |
| row_1550 | XPO7    | exportin 7                                                     | 18334 | -0.267648 | -0.17205268 | 0.8984 | No |
| row_1551 | CEACAM1 | CEA-related cell adhesion molecule 1                           | 18347 | -0.268616 | -0.17230064 | 0.8055 | No |
| row_1552 | PAIP1   | polyadenylate binding protein-interacting protein 1            | 18361 | -0.269118 | -0.17259642 | 0.8979 | No |
| row_1553 | TPM3    | tropomyosin 3, gamma                                           | 18363 | -0.269363 | -0.17231026 | 0.8978 | No |
| row_1554 | TFPI    | tissue factor pathway inhibitor                                | 18367 | -0.269767 | -0.17212054 | 0.8569 | No |
| row_1555 | MYH9    | Myosin, heavy polypeptide 9, non-muscle                        | 18371 | -0.270140 | -0.17193036 | 0.8975 | No |
| row_1556 | PSAT1   | phosphoserine aminotransferase 1                               | 18372 | -0.270172 | -0.17159472 | 0.8975 | No |
| row_1557 | RPL23   | ribosomal protein L23                                          | 18393 | -0.272273 | -0.17222589 | 0.8967 | No |
| row_1558 | PERP    | PERP, TP53 apoptosis effector                                  | 18394 | -0.272278 | -0.17188765 | 0.8967 | No |
| row_1559 | CLCN3   | chloride channel 3                                             | 18397 | -0.272508 | -0.17164604 | 0.8728 | No |
| row_1560 | CD47    | CD47 antigen (Rh-related antigen, integrin-associated signal t | 18399 | -0.272571 | -0.1713559  | 0.8966 | No |
| row_1561 | PPP2R1A | protein phosphatase 2 (formerly 2A), regulatory subunit A (PR  | 18416 | -0.273551 | -0.1717916  | 0.8963 | No |
| row_1562 | TUBA4   | tubulin, alpha 4                                               | 18427 | -0.273830 | -0.17193612 | 0.8962 | No |
| row_1563 | DDX3Y   | DEAD (Asp-Glu-Ala-Asp) box polypeptide 3, Y-linked             | 18440 | -0.274635 | -0.1721766  | 0.8959 | No |
| row_1564 | SOAT1   | sterol O-acyltransferase 1                                     | 18443 | -0.274826 | -0.17193213 | 0.8958 | No |
| row_1565 | NEDD9   | neural precursor cell expressed, developmentally down-regule   | 18448 | -0.275327 | -0.17178397 | 0.8956 | No |
| row_1566 | RUNX1   | runt related transcription factor 1                            | 18450 | -0.275550 | -0.17149012 | 0.8955 | No |
| row_1567 | EHD3    | EH-domain containing 3                                         | 18457 | -0.275772 | -0.17143835 | 0.8868 | No |
| row_1568 | VAMP3   | vesicle-associated membrane protein 3                          | 18469 | -0.277016 | -0.1716274  | 0.8950 | No |
| row_1569 | CCNC    | cyclin C                                                       | 18470 | -0.277019 | -0.17128326 | 0.8950 | No |
| row_1570 | EIF3S10 | eukaryotic translation initiation factor 3, subunit 10 (theta) | 18471 | -0.277093 | -0.17093901 | 0.8950 | No |
| row_1571 | ERO1L   | ERO1-like (S. cerevisiae)                                      | 18472 | -0.277183 | -0.17059468 | 0.8820 | No |
| row_1572 | CRI1    | CREBBP/EP300 inhibitory protein 1                              | 18497 | -0.278781 | -0.17141165 | 0.8944 | No |
| row_1573 | RAB14   | RAB14, member RAS oncogene family                              | 18530 | -0.280362 | -0.17261441 | 0.8938 | No |
| row_1574 | 2-Sep   | septin 2                                                       | 18572 | -0.283083 | -0.17425004 | 0.8928 | No |
| row_1575 | CCT6A   | chaperonin subunit 6a (zeta)                                   | 18577 | -0.283471 | -0.17409177 | 0.8927 | No |
| row_1576 | ZFR     | zinc finger RNA binding protein                                | 18581 | -0.283666 | -0.17388478 | 0.8926 | No |
| row_1577 | ANKRD17 | Ankyrin repeat domain 17                                       | 18584 | -0.283877 | -0.17362906 | 0.8844 | No |
| row_1578 | GPIAP1  | GPI-anchored membrane protein 1                                | 18594 | -0.284660 | -0.17371166 | 0.8923 | No |
| row_1579 | DNAJC3  | DnaJ (Hsp40) homolog, subfamily C, member 3                    | 18613 | -0.285964 | -0.17422888 | 0.8403 | No |
| row_1580 | MPO     | myeloperoxidase                                                | 18623 | -0.286546 | -0.17430915 | 0.8916 | No |

|          |          |                                                                |       |           |             |        |    |
|----------|----------|----------------------------------------------------------------|-------|-----------|-------------|--------|----|
| row_1581 | PLEK     | pleckstrin                                                     | 18637 | -0.287877 | -0.17458163 | 0.8911 | No |
| row_1582 | ATP6V1C1 | ATPase, H+ transporting, lysosomal V1 subunit C1               | 18639 | -0.287951 | -0.17427239 | 0.8911 | No |
| row_1583 | DDX3X    | DEAD/H (Asp-Glu-Ala-Asp/His) box polypeptide 3, X-linked       | 18641 | -0.288158 | -0.17396288 | 0.8910 | No |
| row_1584 | KIF5B    | kinesin family member 5B                                       | 18646 | -0.288716 | -0.17379808 | 0.8908 | No |
| row_1585 | HNRPU    | Heterogeneous nuclear ribonucleoprotein U                      | 18650 | -0.289065 | -0.17358439 | 0.8618 | No |
| row_1586 | ATP6V0C  | ATPase, H+ transporting, lysosomal V0 subunit C                | 18655 | -0.289207 | -0.17341898 | 0.8906 | No |
| row_1587 | TTC3     | tetratricopeptide repeat domain 3                              | 18663 | -0.289934 | -0.17339809 | 0.8904 | No |
| row_1588 | GOLGA4   | golgi autoantigen, golgin subfamily a, 4                       | 18668 | -0.290378 | -0.17323124 | 0.8871 | No |
| row_1589 | RBM12    | RNA binding motif protein 12                                   | 18683 | -0.291261 | -0.173548   | 0.8899 | No |
| row_1590 | SLC9A3R1 | solute carrier family 9 (sodium/hydrogen exchanger), isoform : | 18685 | -0.291377 | -0.17323449 | 0.8899 | No |
| row_1591 | SH3BGR1  | SH3-binding domain glutamic acid-rich protein like             | 18693 | -0.292317 | -0.17321064 | 0.8895 | No |
| row_1592 | CUL3     | cullin 3                                                       | 18698 | -0.292682 | -0.17304093 | 0.8894 | No |
| row_1593 | MSN      | moesin                                                         | 18700 | -0.292720 | -0.17272575 | 0.8894 | No |
| row_1594 | ENPP5    | ectonucleotide pyrophosphatase/phosphodiesterase 5             | 18718 | -0.293946 | -0.17318459 | 0.8667 | No |
| row_1595 | EIF4A2   | eukaryotic translation initiation factor 4A2                   | 18732 | -0.294495 | -0.17344885 | 0.8888 | No |
| row_1596 | CIRBP    | cold inducible RNA binding protein                             | 18753 | -0.296089 | -0.17405044 | 0.8882 | No |
| row_1597 | CCT3     | chaperonin subunit 3 (gamma)                                   | 18770 | -0.298299 | -0.17445539 | 0.8874 | No |
| row_1598 | ATF2     | activating transcription factor 2                              | 18774 | -0.298526 | -0.17422993 | 0.8873 | No |
| row_1599 | RAP2C    | RAP2C, member of RAS oncogene family                           | 18783 | -0.299019 | -0.17424624 | 0.8871 | No |
| row_1600 | ABI1     | abl-interactor 1                                               | 18784 | -0.299027 | -0.17387475 | 0.8871 | No |
| row_1601 | TACSTD1  | tumor-associated calcium signal transducer 1                   | 18814 | -0.301171 | -0.17490625 | 0.8864 | No |
| row_1602 | FUSIP1   | FUS interacting protein (serine-arginine rich) 1               | 18823 | -0.302062 | -0.17491877 | 0.8505 | No |
| row_1603 | ARF3     | ADP-ribosylation factor 3                                      | 18824 | -0.302124 | -0.17454344 | 0.8860 | No |
| row_1604 | CSF1R    | colony stimulating factor 1 receptor                           | 18837 | -0.303035 | -0.17474863 | 0.8854 | No |
| row_1605 | CSDA     | cold shock domain protein A                                    | 18853 | -0.304202 | -0.17509778 | 0.8853 | No |
| row_1606 | PSEN1    | presenilin 1                                                   | 18856 | -0.304296 | -0.1748167  | 0.8853 | No |
| row_1607 | CDADC1   | cytidine and dCMP deaminase domain containing 1                | 18869 | -0.305810 | -0.17501843 | 0.8416 | No |
| row_1608 | STAU2    | staufer (RNA binding protein) homolog 2 (Drosophila)           | 18871 | -0.305946 | -0.17468683 | 0.8847 | No |
| row_1609 | MGAT2    | mannoside acetylglucosaminyltransferase 2                      | 18884 | -0.306869 | -0.17488725 | 0.8635 | No |
| row_1610 | UXS1     | UDP-glucuronate decarboxylase 1                                | 18886 | -0.306989 | -0.17455435 | 0.8779 | No |
| row_1611 | EIF5     | eukaryotic translation initiation factor 5                     | 18889 | -0.307253 | -0.17426959 | 0.8842 | No |
| row_1612 | ROCK1    | Rho-associated coiled-coil forming kinase 1                    | 18914 | -0.309901 | -0.1750479  | 0.8467 | No |
| row_1613 | YWHAQ    | tyrosine 3-monooxygenase/tryptophan 5-monooxygenase acti       | 18916 | -0.310046 | -0.1747112  | 0.8832 | No |
| row_1614 | SLC6A15  | solute carrier family 6 (neurotransmitter transporter), member | 18918 | -0.310146 | -0.17437437 | 0.8631 | No |
| row_1615 | SFRS1    | splicing factor, arginine/serine-rich 1 (ASF/SF2)              | 18946 | -0.312666 | -0.17529465 | 0.8638 | No |
| row_1616 | PIP5K1A  | phosphatidylinositol-4-phosphate 5-kinase, type 1 alpha        | 18952 | -0.313775 | -0.1751472  | 0.8819 | No |
| row_1617 | ELOVL5   | ELOVL family member 5, elongation of long chain fatty acids (  | 18963 | -0.314167 | -0.17524162 | 0.8818 | No |
| row_1618 | BRE      | brain and reproductive organ-expressed protein                 | 18979 | -0.315389 | -0.17557688 | 0.8813 | No |
| row_1619 | RRS1     | RRS1 ribosome biogenesis regulator homolog (S. cerevisiae)     | 18985 | -0.315771 | -0.17542695 | 0.8812 | No |
| row_1620 | HDLBP    | high density lipoprotein (HDL) binding protein                 | 18986 | -0.315784 | -0.17503464 | 0.8812 | No |
| row_1621 | PFTK1    | PFTAIRE protein kinase 1                                       | 18987 | -0.315875 | -0.17464224 | 0.8812 | No |
| row_1622 | LAMP2    | lysosomal membrane glycoprotein 2                              | 19010 | -0.317569 | -0.17531408 | 0.8797 | No |
| row_1623 | UGP2     | UDP-glucose pyrophosphorylase 2                                | 19021 | -0.318439 | -0.1754032  | 0.8488 | No |
| row_1624 | COPG2    | coatamer protein complex, subunit gamma 2                      | 19061 | -0.320704 | -0.17689513 | 0.8636 | No |
| row_1625 | PTN      | pleiotrophin                                                   | 19094 | -0.323035 | -0.17804489 | 0.8485 | No |
| row_1626 | CHORDC1  | cysteine and histidine-rich domain (CHORD)-containing, zinc-   | 19099 | -0.323605 | -0.17783676 | 0.8784 | No |
| row_1627 | ANXA5    | annexin A5                                                     | 19114 | -0.325079 | -0.17811151 | 0.8779 | No |

|          |         |                                                                |       |           |             |        |    |
|----------|---------|----------------------------------------------------------------|-------|-----------|-------------|--------|----|
| row_1628 | PGCP    | plasma glutamate carboxypeptidase                              | 19115 | -0.325137 | -0.17770758 | 0.8779 | No |
| row_1629 | SMAP1   | stromal membrane-associated protein 1                          | 19125 | -0.326219 | -0.17773856 | 0.8676 | No |
| row_1630 | TGFBI   | transforming growth factor, beta induced                       | 19129 | -0.326443 | -0.17747843 | 0.8330 | No |
| row_1631 | UGCG    | UDP-glucose ceramide glucosyltransferase                       | 19131 | -0.326625 | -0.17712113 | 0.8774 | No |
| row_1632 | GPIAP1  | GPI-anchored membrane protein 1                                | 19170 | -0.330212 | -0.1785528  | 0.8761 | No |
| row_1633 | LGALS8  | lectin, galactose binding, soluble 8                           | 19176 | -0.330677 | -0.17838435 | 0.8494 | No |
| row_1634 | SNX5    | sorting nexin 5                                                | 19202 | -0.332387 | -0.1791832  | 0.8753 | No |
| row_1635 | CCNI    | cyclin I                                                       | 19205 | -0.332764 | -0.17886674 | 0.8752 | No |
| row_1636 | TLE3    | transducin-like enhancer of split 3, homolog of Drosophila E(s | 19215 | -0.333835 | -0.17888826 | 0.8748 | No |
| row_1637 | UCHL5   | ubiquitin carboxyl-terminal esterase L5                        | 19227 | -0.335376 | -0.17900479 | 0.8743 | No |
| row_1638 | FZD3    | frizzled homolog 3 (Drosophila)                                | 19228 | -0.335474 | -0.17858803 | 0.7392 | No |
| row_1639 | ATP6V0C | ATPase, H+ transporting, lysosomal V0 subunit C                | 19260 | -0.338402 | -0.17967023 | 0.8732 | No |
| row_1640 | EIF4G2  | eukaryotic translation initiation factor 4, gamma 2            | 19270 | -0.339090 | -0.17968522 | 0.8730 | No |
| row_1641 | CLIC4   | chloride intracellular channel 4 (mitochondrial)               | 19276 | -0.339465 | -0.17950585 | 0.8728 | No |
| row_1642 | RAB2    | RAB2, member RAS oncogene family                               | 19286 | -0.340367 | -0.17951925 | 0.8456 | No |
| row_1643 | NAP1L1  | nucleosome assembly protein 1-like 1                           | 19292 | -0.341205 | -0.17933773 | 0.8722 | No |
| row_1644 | SLC38A2 | solute carrier family 38, member 2                             | 19301 | -0.341897 | -0.17930076 | 0.8633 | No |
| row_1645 | C3      | complement component 3                                         | 19308 | -0.342566 | -0.179166   | 0.7319 | No |
| row_1646 | CANX    | calnexin                                                       | 19320 | -0.344444 | -0.17927128 | 0.8711 | No |
| row_1647 | EIF5A   | eukaryotic translation initiation factor 5A                    | 19326 | -0.344745 | -0.17908536 | 0.8538 | No |
| row_1648 | SNX5    | sorting nexin 5                                                | 19331 | -0.345166 | -0.17885043 | 0.8708 | No |
| row_1649 | AGL     | amylase-1,6-glycosidase, 4-alpha-glucanotransferase            | 19334 | -0.345491 | -0.17851818 | 0.7722 | No |
| row_1650 | CEACAM1 | CEA-related cell adhesion molecule 1                           | 19337 | -0.345677 | -0.17818567 | 0.8652 | No |
| row_1651 | HNRPK   | heterogeneous nuclear ribonucleoprotein K                      | 19346 | -0.346776 | -0.17814264 | 0.8703 | No |
| row_1652 | CD47    | CD47 antigen (Rh-related antigen, integrin-associated signal t | 19348 | -0.346953 | -0.1777601  | 0.8702 | No |
| row_1653 | IDI1    | isopentenyl-diphosphate delta isomerase                        | 19361 | -0.348249 | -0.1779091  | 0.8698 | No |
| row_1654 | CD28    | CD28 antigen                                                   | 19364 | -0.348349 | -0.1775733  | 0.8697 | No |
| row_1655 | PA2G4   | proliferation-associated 2G4                                   | 19380 | -0.349667 | -0.17786597 | 0.8693 | No |
| row_1656 | ATF1    | activating transcription factor 1                              | 19403 | -0.351612 | -0.17849551 | 0.8686 | No |
| row_1657 | BMPR1A  | bone morphogenetic protein receptor, type 1A                   | 19404 | -0.351701 | -0.1780586  | 0.8686 | No |
| row_1658 | YWHAQ   | tyrosine 3-monooxygenase/tryptophan 5-monooxygenase acti       | 19406 | -0.351778 | -0.17767006 | 0.8685 | No |
| row_1659 | AHCYL1  | S-adenosylhomocysteine hydrolase-like 1                        | 19418 | -0.353125 | -0.17776455 | 0.8681 | No |
| row_1660 | TACSTD2 | tumor-associated calcium signal transducer 2                   | 19426 | -0.353758 | -0.17766437 | 0.7721 | No |
| row_1661 | WDR13   | WD repeat domain 13                                            | 19453 | -0.356011 | -0.17848232 | 0.8671 | No |
| row_1662 | VPS35   | vacuolar protein sorting 35                                    | 19454 | -0.356068 | -0.17803998 | 0.8341 | No |
| row_1663 | DARS    | aspartyl-tRNA synthetase                                       | 19457 | -0.356117 | -0.17769453 | 0.8670 | No |
| row_1664 | EIF2S2  | eukaryotic translation initiation factor 2, subunit 2 (beta)   | 19459 | -0.356251 | -0.17730042 | 0.8670 | No |
| row_1665 | HK1     | hexokinase 1                                                   | 19469 | -0.357344 | -0.17729273 | 0.8340 | No |
| row_1666 | BMPR1A  | bone morphogenetic protein receptor, type 1A                   | 19471 | -0.357573 | -0.17689699 | 0.8087 | No |
| row_1667 | IFITM2  | interferon induced transmembrane protein 2                     | 19476 | -0.358009 | -0.17664611 | 0.8664 | No |
| row_1668 | NR1D2   | nuclear receptor subfamily 1, group D, member 2                | 19481 | -0.358522 | -0.17639461 | 0.8662 | No |
| row_1669 | YWHAZ   | tyrosine 3-monooxygenase/tryptophan 5-monooxygenase acti       | 19485 | -0.359095 | -0.1760939  | 0.8576 | No |
| row_1670 | YWHAE   | tyrosine 3-monooxygenase/tryptophan 5-monooxygenase acti       | 19496 | -0.360220 | -0.17613111 | 0.8656 | No |
| row_1671 | USP14   | ubiquitin specific peptidase 14                                | 19499 | -0.360424 | -0.17578031 | 0.8373 | No |
| row_1672 | SEC63   | SEC63-like (S. cerevisiae)                                     | 19510 | -0.361295 | -0.17581618 | 0.8451 | No |
| row_1673 | CHUK    | conserved helix-loop-helix ubiquitous kinase                   | 19512 | -0.361752 | -0.17541525 | 0.8651 | No |
| row_1674 | UBE2J1  | ubiquitin-conjugating enzyme E2, J1                            | 19518 | -0.362574 | -0.17520717 | 0.8648 | No |

|          |          |                                                                         |       |           |             |        |    |
|----------|----------|-------------------------------------------------------------------------|-------|-----------|-------------|--------|----|
| row_1675 | ATP2A2   | ATPase, Ca <sup>++</sup> transporting, cardiac muscle, slow twitch 2    | 19519 | -0.362631 | -0.17475668 | 0.8013 | No |
| row_1676 | SPTLC1   | serine palmitoyltransferase, long chain base subunit 1                  | 19521 | -0.362766 | -0.17435448 | 0.8647 | No |
| row_1677 | SPTLC1   | serine palmitoyltransferase, long chain base subunit 1                  | 19533 | -0.364899 | -0.17443433 | 0.8640 | No |
| row_1678 | TFPI     | tissue factor pathway inhibitor                                         | 19557 | -0.367342 | -0.17509282 | 0.6604 | No |
| row_1679 | ING3     | inhibitor of growth family, member 3                                    | 19558 | -0.367419 | -0.17463636 | 0.8631 | No |
| row_1680 | PLEK     | pleckstrin                                                              | 19564 | -0.368200 | -0.17442131 | 0.8628 | No |
| row_1681 | PPP3R1   | protein phosphatase 3, regulatory subunit B, alpha isoform (c           | 19570 | -0.369021 | -0.17420523 | 0.8604 | No |
| row_1682 | HMGCR    | 3-hydroxy-3-methylglutaryl-Coenzyme A reductase                         | 19572 | -0.369410 | -0.17379478 | 0.8227 | No |
| row_1683 | MMP14    | matrix metalloproteinase 14 (membrane-inserted)                         | 19593 | -0.371638 | -0.1743025  | 0.7329 | No |
| row_1684 | GSTM1    | glutathione S-transferase, mu 1                                         | 19597 | -0.372187 | -0.17398556 | 0.8614 | No |
| row_1685 | UGP2     | UDP-glucose pyrophosphorylase 2                                         | 19602 | -0.372445 | -0.17371674 | 0.8614 | No |
| row_1686 | EIF3S1   | eukaryotic translation initiation factor 3, subunit 1 alpha             | 19613 | -0.373591 | -0.17373735 | 0.7816 | No |
| row_1687 | RNF141   | ring finger protein 141                                                 | 19623 | -0.374117 | -0.17370881 | 0.8608 | No |
| row_1688 | STAM     | signal transducing adaptor molecule (SH3 domain and ITAM r              | 19629 | -0.374644 | -0.17348574 | 0.8355 | No |
| row_1689 | RAB10    | RAB10, member RAS oncogene family                                       | 19632 | -0.375340 | -0.1731164  | 0.8603 | No |
| row_1690 | MATN4    | matrilin 4                                                              | 19634 | -0.375369 | -0.17269854 | 0.8603 | No |
| row_1691 | COPB2    | coatamer protein complex, subunit beta 2 (beta prime)                   | 19647 | -0.376624 | -0.17281231 | 0.8538 | No |
| row_1692 | STAG2    | stromal antigen 2                                                       | 19655 | -0.377528 | -0.17268261 | 0.8596 | No |
| row_1693 | HMMR     | hyaluronan mediated motility receptor (RHAMM)                           | 19676 | -0.380124 | -0.17317979 | 0.8176 | No |
| row_1694 | SC4MOL   | sterol-C4-methyl oxidase-like                                           | 19681 | -0.380627 | -0.17290083 | 0.8585 | No |
| row_1695 | CSNK1D   | casein kinase 1, delta                                                  | 19690 | -0.381472 | -0.17281468 | 0.8582 | No |
| row_1696 | FUS      | fusion, derived from t(12;16) malignant liposarcoma (human)             | 19694 | -0.381654 | -0.17248596 | 0.8582 | No |
| row_1697 | EIF3S1   | eukaryotic translation initiation factor 3, subunit 1 alpha             | 19695 | -0.381788 | -0.17201167 | 0.8581 | No |
| row_1698 | LATS2    | large tumor suppressor 2                                                | 19698 | -0.382091 | -0.17163394 | 0.8580 | No |
| row_1699 | YWHAE    | tyrosine 3-monooxygenase/tryptophan 5-monooxygenase acti                | 19699 | -0.382259 | -0.17115906 | 0.8580 | No |
| row_1700 | METAP2   | methionine aminopeptidase 2                                             | 19707 | -0.382918 | -0.17102265 | 0.8577 | No |
| row_1701 | BMPR1A   | bone morphogenetic protein receptor, type 1A                            | 19718 | -0.384510 | -0.17102969 | 0.7445 | No |
| row_1702 | ARF4     | ADP-ribosylation factor 4                                               | 19722 | -0.384621 | -0.17069729 | 0.8571 | No |
| row_1703 | NCBP2    | nuclear cap binding protein subunit 2                                   | 19729 | -0.385154 | -0.17050962 | 0.8570 | No |
| row_1704 | YME1L1   | YME1-like 1 (S. cerevisiae)                                             | 19737 | -0.386637 | -0.1703686  | 0.8401 | No |
| row_1705 | VAPA     | vesicle-associated membrane protein, associated protein A               | 19743 | -0.387498 | -0.17012957 | 0.8561 | No |
| row_1706 | GNG12    | guanine nucleotide binding protein (G protein), gamma 12                | 19745 | -0.387587 | -0.16969654 | 0.8155 | No |
| row_1707 | ANKRD10  | ankyrin repeat domain 10                                                | 19755 | -0.388576 | -0.16965005 | 0.8558 | No |
| row_1708 | E2F5     | E2F transcription factor 5                                              | 19764 | -0.389772 | -0.1695536  | 0.8554 | No |
| row_1709 | KIFAP3   | kinesin-associated protein 3                                            | 19773 | -0.390619 | -0.1694561  | 0.8466 | No |
| row_1710 | ROD1     | ROD1 regulator of differentiation 1 (S. pombe)                          | 19775 | -0.390752 | -0.16901913 | 0.8550 | No |
| row_1711 | SGPP1    | sphingosine-1-phosphate phosphatase 1                                   | 19803 | -0.392867 | -0.16983978 | 0.8473 | No |
| row_1712 | RAD23B   | RAD23b homolog (S. cerevisiae)                                          | 19813 | -0.394159 | -0.16978636 | 0.8310 | No |
| row_1713 | FZD3     | Frizzled homolog 3 (Drosophila)                                         | 19852 | -0.396942 | -0.17113513 | 0.7640 | No |
| row_1714 | ATP5F1   | ATP synthase, H <sup>+</sup> transporting, mitochondrial F0 complex, su | 19863 | -0.397774 | -0.17112568 | 0.8526 | No |
| row_1715 | HNRPK    | heterogeneous nuclear ribonucleoprotein K                               | 19867 | -0.398817 | -0.17077564 | 0.8523 | No |
| row_1716 | ATP6V1C1 | ATPase, H <sup>+</sup> transporting, lysosomal V1 subunit C1            | 19880 | -0.400770 | -0.17085941 | 0.8516 | No |
| row_1717 | GSTM1    | glutathione S-transferase, mu 1                                         | 19882 | -0.400945 | -0.17040978 | 0.8515 | No |
| row_1718 | ITGA3    | integrin alpha 3                                                        | 19886 | -0.401143 | -0.17005685 | 0.8246 | No |
| row_1719 | PTP4A2   | Protein tyrosine phosphatase 4a2                                        | 19892 | -0.401560 | -0.16980036 | 0.8513 | No |
| row_1720 | PTPN12   | protein tyrosine phosphatase, non-receptor type 12                      | 19897 | -0.402098 | -0.1694947  | 0.8049 | No |
| row_1721 | BMP4     | bone morphogenetic protein 4                                            | 19908 | -0.403805 | -0.16947776 | 0.7895 | No |

|          |         |                                                          |       |           |             |        |    |
|----------|---------|----------------------------------------------------------|-------|-----------|-------------|--------|----|
| row_1722 | DDR1    | discoidin domain receptor family, member 1               | 19921 | -0.405559 | -0.16955559 | 0.8499 | No |
| row_1723 | SLC12A6 | solute carrier family 12, member 6                       | 19926 | -0.406301 | -0.16924472 | 0.8497 | No |
| row_1724 | LCMT2   | leucine carboxyl methyltransferase 2                     | 19928 | -0.406389 | -0.16878833 | 0.8418 | No |
| row_1725 | TXNL2   | thioredoxin-like 2                                       | 19936 | -0.407039 | -0.16862197 | 0.8494 | No |
| row_1726 | SOAT1   | sterol O-acyltransferase 1                               | 19948 | -0.408536 | -0.16864762 | 0.8197 | No |
| row_1727 | NCOA6IP | nuclear receptor coactivator 6 interacting protein       | 19963 | -0.409845 | -0.16881706 | 0.8485 | No |
| row_1728 | RAB2    | RAB2, member RAS oncogene family                         | 19964 | -0.409923 | -0.16830781 | 0.8485 | No |
| row_1729 | LAPTM4A | lysosomal-associated protein transmembrane 4A            | 19967 | -0.410063 | -0.16789533 | 0.8484 | No |
| row_1730 | CEACAM1 | CEA-related cell adhesion molecule 1                     | 19971 | -0.410520 | -0.16753075 | 0.7979 | No |
| row_1731 | MCL1    | myeloid cell leukemia sequence 1                         | 19975 | -0.410737 | -0.1671659  | 0.8482 | No |
| row_1732 | RBM12   | RNA binding motif protein 12                             | 19980 | -0.411055 | -0.16684914 | 0.8481 | No |
| row_1733 | EIF5A   | eukaryotic translation initiation factor 5A              | 19997 | -0.413375 | -0.16711113 | 0.8473 | No |
| row_1734 | FECH    | ferrochelatase                                           | 20005 | -0.414070 | -0.16693603 | 0.8362 | No |
| row_1735 | NFX1    | nuclear transcription factor, X-box binding 1            | 20006 | -0.414072 | -0.16642162 | 0.8470 | No |
| row_1736 | MTPN    | myotrophin                                               | 20011 | -0.414391 | -0.16610071 | 0.8469 | No |
| row_1737 | NONO    | non-POU-domain-containing, octamer binding protein       | 20012 | -0.414510 | -0.16558576 | 0.8469 | No |
| row_1738 | ATP2A2  | ATPase, Ca++ transporting, cardiac muscle, slow twitch 2 | 20030 | -0.415750 | -0.16589327 | 0.7519 | No |
| row_1739 | ABI1    | abl-interactor 1                                         | 20032 | -0.416049 | -0.16542488 | 0.8350 | No |
| row_1740 | SGPL1   | sphingosine phosphate lyase 1                            | 20047 | -0.418126 | -0.16558404 | 0.8457 | No |
| row_1741 | YWHAQ   | 3-monooxygenase/tryptophan 5-monooxygenase activation pr | 20048 | -0.418214 | -0.16506448 | 0.8456 | No |
| row_1742 | HMGB1   | high mobility group box 1                                | 20059 | -0.419355 | -0.16502823 | 0.8452 | No |
| row_1743 | SFRS1   | splicing factor, arginine/serine-rich 1 (ASF/SF2)        | 20067 | -0.420237 | -0.16484547 | 0.8339 | No |
| row_1744 | HNRPAB  | heterogeneous nuclear ribonucleoprotein A/B              | 20082 | -0.421017 | -0.16500102 | 0.8447 | No |
| row_1745 | MTCH2   | mitochondrial carrier homolog 2 (C. elegans)             | 20095 | -0.421877 | -0.16505857 | 0.8433 | No |
| row_1746 | PEX13   | peroxisomal biogenesis factor 13                         | 20109 | -0.423520 | -0.16516255 | 0.8178 | No |
| row_1747 | NCOA6IP | nuclear receptor coactivator 6 interacting protein       | 20115 | -0.423824 | -0.16487838 | 0.8437 | No |
| row_1748 | PUM1    | pumilio 1 (Drosophila)                                   | 20137 | -0.426104 | -0.16536693 | 0.8429 | No |
| row_1749 | MTPN    | myotrophin                                               | 20144 | -0.426473 | -0.16512795 | 0.8428 | No |
| row_1750 | ABCC5   | ATP-binding cassette, sub-family C (CFTR/MRP), member 5  | 20145 | -0.426612 | -0.16459796 | 0.7888 | No |
| row_1751 | PDE4B   | phosphodiesterase 4B, cAMP specific                      | 20156 | -0.428775 | -0.16455    | 0.8420 | No |
| row_1752 | ACTR3   | ARP3 actin-related protein 3 homolog (yeast)             | 20157 | -0.428843 | -0.16401725 | 0.8420 | No |
| row_1753 | SLC3A1  | solute carrier family 3, member 1                        | 20177 | -0.430671 | -0.16440317 | 0.8414 | No |
| row_1754 | MCL1    | myeloid cell leukemia sequence 1                         | 20183 | -0.431441 | -0.16410954 | 0.8411 | No |
| row_1755 | TPP2    | tripeptidyl peptidase II                                 | 20185 | -0.431736 | -0.16362166 | 0.7707 | No |
| row_1756 | 7-Sep   | septin 7                                                 | 20188 | -0.431977 | -0.16318196 | 0.8410 | No |
| row_1757 | TPD52   | tumor protein D52                                        | 20195 | -0.432609 | -0.16293536 | 0.8407 | No |
| row_1758 | PGCP    | plasma glutamate carboxypeptidase                        | 20204 | -0.433635 | -0.16278441 | 0.8381 | No |
| row_1759 | GRSF1   | G-rich RNA sequence binding factor 1                     | 20221 | -0.435361 | -0.16301909 | 0.8398 | No |
| row_1760 | TGFBI   | transforming growth factor, beta induced                 | 20229 | -0.436134 | -0.16281658 | 0.7473 | No |
| row_1761 | XBP1    | X-box binding protein 1                                  | 20240 | -0.437486 | -0.1627578  | 0.8391 | No |
| row_1762 | HNRPC   | heterogeneous nuclear ribonucleoprotein C                | 20247 | -0.438481 | -0.1625039  | 0.8387 | No |
| row_1763 | RAB14   | RAB14, member RAS oncogene family                        | 20252 | -0.439076 | -0.16215232 | 0.7832 | No |
| row_1764 | UBE2D2  | ubiquitin-conjugating enzyme E2D 2                       | 20256 | -0.439622 | -0.16175158 | 0.8384 | No |
| row_1765 | KPNA1   | karyopherin (importin) alpha 1                           | 20259 | -0.440199 | -0.16130167 | 0.8382 | No |
| row_1766 | NUSAP1  | nucleolar and spindle associated protein 1               | 20264 | -0.440560 | -0.16094825 | 0.8380 | No |
| row_1767 | XBP1    | X-box binding protein 1                                  | 20286 | -0.443678 | -0.16141494 | 0.8370 | No |
| row_1768 | SRPK2   | serine/arginine-rich protein specific kinase 2           | 20290 | -0.444341 | -0.16100834 | 0.8368 | No |

|          |          |                                                                   |       |           |             |        |    |
|----------|----------|-------------------------------------------------------------------|-------|-----------|-------------|--------|----|
| row_1769 | RIN2     | Ras and Rab interactor 2                                          | 20302 | -0.445636 | -0.16098791 | 0.8363 | No |
| row_1770 | SPRED2   | sprouty-related, EVH1 domain containing 2                         | 20306 | -0.446106 | -0.16057913 | 0.8351 | No |
| row_1771 | SNX5     | sorting nexin 5                                                   | 20310 | -0.446783 | -0.1601695  | 0.8359 | No |
| row_1772 | GSPT1    | G1 to S phase transition 1                                        | 20315 | -0.447473 | -0.15980749 | 0.8357 | No |
| row_1773 | PRPS1    | phosphoribosyl pyrophosphate synthetase 1                         | 20321 | -0.448690 | -0.15949243 | 0.8353 | No |
| row_1774 | EIF4E    | eukaryotic translation initiation factor 4E                       | 20324 | -0.449349 | -0.15903115 | 0.8351 | No |
| row_1775 | ANKRD17  | ankyrin repeat domain 17                                          | 20336 | -0.451716 | -0.15900315 | 0.8343 | No |
| row_1776 | GSPT1    | G1 to S phase transition 1                                        | 20362 | -0.455883 | -0.15964858 | 0.8294 | No |
| row_1777 | GSR      | glutathione reductase 1                                           | 20365 | -0.456314 | -0.15917864 | 0.8216 | No |
| row_1778 | WDR26    | WD repeat domain 26                                               | 20371 | -0.457273 | -0.15885292 | 0.8324 | No |
| row_1779 | ATP6AP2  | ATPase, H+ transporting, lysosomal accessory protein 2            | 20377 | -0.457773 | -0.15852658 | 0.8322 | No |
| row_1780 | PMAIP1   | phorbol-12-myristate-13-acetate-induced protein 1                 | 20381 | -0.458067 | -0.15810294 | 0.7602 | No |
| row_1781 | SORBS1   | sorbin and SH3 domain containing 1                                | 20396 | -0.460700 | -0.1582092  | 0.8313 | No |
| row_1782 | SERPINE2 | serine (or cysteine) peptidase inhibitor, clade E, member 2       | 20403 | -0.461680 | -0.15792648 | 0.6956 | No |
| row_1783 | RNF141   | ring finger protein 141                                           | 20405 | -0.461876 | -0.15740116 | 0.8309 | No |
| row_1784 | FBXW2    | F-box and WD-40 domain protein 2                                  | 20412 | -0.462411 | -0.15711753 | 0.8307 | No |
| row_1785 | TSN      | translin                                                          | 20415 | -0.462820 | -0.15663952 | 0.8158 | No |
| row_1786 | YWHAQ    | tyrosine 3-monooxygenase/tryptophan 5-monooxygenase acti          | 20416 | -0.463003 | -0.15606432 | 0.8305 | No |
| row_1787 | CD2AP    | CD2-associated protein                                            | 20418 | -0.463195 | -0.15553737 | 0.7880 | No |
| row_1788 | TLE3     | transducin-like enhancer of split 3, homolog of Drosophila E(s    | 20432 | -0.465301 | -0.15558945 | 0.8297 | No |
| row_1789 | YWHAQ    | tyrosine 3-monooxygenase/tryptophan 5-monooxygenase acti          | 20433 | -0.465377 | -0.1550113  | 0.8297 | No |
| row_1790 | EIF5     | eukaryotic translation initiation factor 5                        | 20435 | -0.465795 | -0.15448111 | 0.8296 | No |
| row_1791 | RNF141   | ring finger protein 141                                           | 20444 | -0.466830 | -0.15428893 | 0.8292 | No |
| row_1792 | MTAP     | methylthioadenosine phosphorylase                                 | 20448 | -0.467515 | -0.15385355 | 0.8290 | No |
| row_1793 | MAPK1    | mitogen activated protein kinase 1                                | 20457 | -0.469363 | -0.15365823 | 0.8284 | No |
| row_1794 | PTPLA    | protein tyrosine phosphatase-like (proline instead of catalytic c | 20460 | -0.469384 | -0.15317206 | 0.8284 | No |
| row_1795 | CDADC1   | cytidine and dCMP deaminase domain containing 1                   | 20462 | -0.469500 | -0.15263726 | 0.6414 | No |
| row_1796 | IVNS1ABP | influenza virus NS1A binding protein                              | 20470 | -0.470490 | -0.15239207 | 0.8280 | No |
| row_1797 | SFRS1    | splicing factor, arginine/serine-rich 1 (ASF/SF2)                 | 20479 | -0.471468 | -0.15219413 | 0.8277 | No |
| row_1798 | UBE1C    | ubiquitin-activating enzyme E1C                                   | 20481 | -0.472101 | -0.1516561  | 0.7999 | No |
| row_1799 | ANP32E   | acidic (leucine-rich) nuclear phosphoprotein 32 family, memb      | 20486 | -0.472897 | -0.1512625  | 0.8272 | No |
| row_1800 | VAPA     | vesicle-associated membrane protein, associated protein A         | 20505 | -0.475621 | -0.15154412 | 0.8263 | No |
| row_1801 | SYBL1    | synaptobrevin like 1                                              | 20521 | -0.477070 | -0.15167852 | 0.8258 | No |
| row_1802 | TWSG1    | twisted gastrulation homolog 1 (Drosophila)                       | 20532 | -0.478943 | -0.15156823 | 0.8252 | No |
| row_1803 | FUSIP1   | FUS interacting protein (serine-arginine rich) 1                  | 20534 | -0.479748 | -0.1510207  | 0.8180 | No |
| row_1804 | LATS2    | large tumor suppressor 2                                          | 20537 | -0.480248 | -0.15052104 | 0.8203 | No |
| row_1805 | CCT2     | chaperonin subunit 2 (beta)                                       | 20539 | -0.480406 | -0.14997269 | 0.8247 | No |
| row_1806 | E2F5     | E2F transcription factor 5                                        | 20543 | -0.481178 | -0.14952034 | 0.7861 | No |
| row_1807 | TPP2     | tripeptidyl peptidase II                                          | 20554 | -0.482656 | -0.14940545 | 0.8239 | No |
| row_1808 | NDFIP2   | Nedd4 family interacting protein 2                                | 20556 | -0.482809 | -0.14885412 | 0.8030 | No |
| row_1809 | SHOC2    | soc-2 (suppressor of clear) homolog (C. elegans)                  | 20562 | -0.484236 | -0.14849491 | 0.8234 | No |
| row_1810 | CCNC     | cyclin C                                                          | 20594 | -0.489201 | -0.14938976 | 0.6148 | No |
| row_1811 | FMO5     | flavin containing monooxygenase 5                                 | 20607 | -0.490284 | -0.14936234 | 0.8009 | No |
| row_1812 | ALDH9A1  | aldehyde dehydrogenase 9, subfamily A1                            | 20608 | -0.490340 | -0.14875318 | 0.8214 | No |
| row_1813 | FBXW2    | F-box and WD-40 domain protein 2                                  | 20613 | -0.490683 | -0.14833748 | 0.7796 | No |
| row_1814 | PPP1CB   | protein phosphatase 1, catalytic subunit, beta isoform            | 20636 | -0.493651 | -0.14879058 | 0.8124 | No |
| row_1815 | UBE2D3   | ubiquitin-conjugating enzyme E2D 3 (UBC4/5 homolog, yeast         | 20638 | -0.494150 | -0.14822517 | 0.8201 | No |



|          |          |                                                                  |       |           |             |        |    |
|----------|----------|------------------------------------------------------------------|-------|-----------|-------------|--------|----|
| row_1816 | VAV3     | vav 3 oncogene                                                   | 20643 | -0.494803 | -0.14780435 | 0.8199 | No |
| row_1817 | CDC42    | cell division cycle 42 homolog (S. cerevisiae)                   | 20648 | -0.495953 | -0.14738211 | 0.8195 | No |
| row_1818 | VPS35    | vacuolar protein sorting 35                                      | 20653 | -0.497755 | -0.14695764 | 0.8189 | No |
| row_1819 | CHN2     | chimerin (chimaerin) 2                                           | 20656 | -0.497987 | -0.14643593 | 0.8188 | No |
| row_1820 | PAFAH1B1 | platelet-activating factor acetylhydrolase, isoform 1b, beta1 su | 20661 | -0.498645 | -0.14601034 | 0.8186 | No |
| row_1821 | SDC4     | syndecan 4                                                       | 20666 | -0.499139 | -0.14558414 | 0.7816 | No |
| row_1822 | CD151    | CD151 antigen                                                    | 20667 | -0.499168 | -0.14496402 | 0.8185 | No |
| row_1823 | UGP2     | UDP-glucose pyrophosphorylase 2                                  | 20673 | -0.499697 | -0.14458561 | 0.8183 | No |
| row_1824 | FUS      | fusion, derived from t(12;16) malignant liposarcoma (human)      | 20679 | -0.501501 | -0.14420494 | 0.8177 | No |
| row_1825 | DNAJC3   | DnaJ (Hsp40) homolog, subfamily C, member 3                      | 20683 | -0.502210 | -0.14372645 | 0.8041 | No |
| row_1826 | RPS6KA3  | ribosomal protein S6 kinase polypeptide 3                        | 20685 | -0.502301 | -0.14315093 | 0.7889 | No |
| row_1827 | PSMA1    | proteasome (prosome, macropain) subunit, alpha type 1            | 20686 | -0.502478 | -0.14252669 | 0.8174 | No |
| row_1828 | EIF4A1   | eukaryotic translation initiation factor 4A1                     | 20693 | -0.503316 | -0.14219224 | 0.8171 | No |
| row_1829 | GRSF1    | G-rich RNA sequence binding factor 1                             | 20695 | -0.503449 | -0.14161527 | 0.8170 | No |
| row_1830 | ZFX      | zinc finger protein X-linked                                     | 20699 | -0.504005 | -0.14113456 | 0.8169 | No |
| row_1831 | AGL      | amylase-1,6-glucosidase, 4-alpha-glucanotransferase              | 20702 | -0.504601 | -0.14060463 | 0.7301 | No |
| row_1832 | ERO1L    | ERO1-like (S. cerevisiae)                                        | 20716 | -0.506526 | -0.1406055  | 0.8160 | No |
| row_1833 | PBEF1    | pre-B-cell colony-enhancing factor 1                             | 20731 | -0.508720 | -0.1406521  | 0.8153 | No |
| row_1834 | NDFIP1   | Nedd4 family interacting protein 1                               | 20755 | -0.512046 | -0.14113082 | 0.7680 | No |
| row_1835 | PSCDBP   | pleckstrin homology, Sec7 and coiled-coil domains, binding pr    | 20756 | -0.512066 | -0.14049467 | 0.8077 | No |
| row_1836 | CSNK2A1  | casein kinase II, alpha 1 polypeptide                            | 20761 | -0.513389 | -0.14005077 | 0.7900 | No |
| row_1837 | SYBL1    | synaptobrevin like 1                                             | 20763 | -0.513692 | -0.13946109 | 0.8137 | No |
| row_1838 | TAX1BP1  | Tax1 (human T-cell leukemia virus type I) binding protein 1      | 20765 | -0.513807 | -0.13887125 | 0.8136 | No |
| row_1839 | CFLAR    | CASP8 and FADD-like apoptosis regulator                          | 20766 | -0.513846 | -0.1382329  | 0.7934 | No |
| row_1840 | PSCDBP   | pleckstrin homology, Sec7 and coiled-coil domains, binding pr    | 20784 | -0.516916 | -0.13841474 | 0.8126 | No |
| row_1841 | VAMP3    | vesicle-associated membrane protein 3                            | 20786 | -0.517210 | -0.13782068 | 0.8125 | No |
| row_1842 | GFPT2    | glutamine fructose-6-phosphate transaminase 2                    | 20810 | -0.520135 | -0.13828933 | 0.7535 | No |
| row_1843 | PIK3R1   | phosphatidylinositol 3-kinase, regulatory subunit, polypeptide   | 20848 | -0.525132 | -0.13943039 | 0.8099 | No |
| row_1844 | IL1RAPL2 | interleukin 1 receptor accessory protein-like 2                  | 20858 | -0.526429 | -0.13921264 | 0.7601 | No |
| row_1845 | AP3S1    | adaptor-related protein complex 3, sigma 1 subunit               | 20868 | -0.528245 | -0.13899264 | 0.7870 | No |
| row_1846 | UBE2L3   | ubiquitin-conjugating enzyme E2L 3                               | 20871 | -0.529521 | -0.13843174 | 0.7575 | No |
| row_1847 | PTGER3   | prostaglandin E receptor 3 (subtype EP3)                         | 20873 | -0.529608 | -0.13782229 | 0.7958 | No |
| row_1848 | VAPA     | vesicle-associated membrane protein, associated protein A        | 20874 | -0.529664 | -0.13716428 | 0.7065 | No |
| row_1849 | AMPD3    | AMP deaminase 3                                                  | 20879 | -0.530482 | -0.13669914 | 0.7828 | No |
| row_1850 | GSPT1    | G1 to S phase transition 1                                       | 20893 | -0.532386 | -0.13666788 | 0.8075 | No |
| row_1851 | PLEKHA3  | pleckstrin homology domain-containing, family A (phosphoino      | 20894 | -0.532605 | -0.13600622 | 0.8075 | No |
| row_1852 | IFRG15   | interferon alpha responsive gene                                 | 20907 | -0.534316 | -0.13592409 | 0.8069 | No |
| row_1853 | CALR     | calreticulin                                                     | 20912 | -0.535418 | -0.13545282 | 0.8065 | No |
| row_1854 | SLC9A3R1 | solute carrier family 9 (sodium/hydrogen exchanger), isoform :   | 20921 | -0.536574 | -0.135174   | 0.8046 | No |
| row_1855 | CHCHD2   | coiled-coil-helix-coiled-coil-helix domain containing 2          | 20956 | -0.543008 | -0.13614742 | 0.7921 | No |
| row_1856 | GOLPH3   | golgi phosphoprotein 3                                           | 20960 | -0.543539 | -0.1356176  | 0.7932 | No |
| row_1857 | MTCH2    | mitochondrial carrier homolog 2 (C. elegans)                     | 20962 | -0.543613 | -0.13499074 | 0.8039 | No |
| row_1858 | RAB2     | RAB2, member RAS oncogene family                                 | 20963 | -0.543772 | -0.13431521 | 0.8038 | No |
| row_1859 | TNPO1    | transportin 1                                                    | 20965 | -0.544365 | -0.13368742 | 0.8036 | No |
| row_1860 | EMP2     | epithelial membrane protein 2                                    | 20971 | -0.545631 | -0.13325194 | 0.8032 | No |
| row_1861 | MYH9     | myosin, heavy polypeptide 9, non-muscle                          | 20973 | -0.545975 | -0.13262214 | 0.7614 | No |
| row_1862 | UBE2D3   | ubiquitin-conjugating enzyme E2D 3 (UBC4/5 homolog, yeast        | 20976 | -0.546511 | -0.13204014 | 0.8029 | No |

|          |         |                                                              |       |           |              |        |    |
|----------|---------|--------------------------------------------------------------|-------|-----------|--------------|--------|----|
| row_1863 | NFX1    | nuclear transcription factor, X-box binding 1                | 21009 | -0.551899 | -0.13290559  | 0.8012 | No |
| row_1864 | WDR12   | WD repeat domain 12                                          | 21018 | -0.553096 | -0.13260624  | 0.8008 | No |
| row_1865 | NPM1    | Nucleophosmin 1                                              | 21032 | -0.555593 | -0.13254614  | 0.8000 | No |
| row_1866 | KCMF1   | potassium channel modulatory factor 1                        | 21051 | -0.558761 | -0.13272446  | 0.7990 | No |
| row_1867 | CCNI    | cyclin I                                                     | 21055 | -0.559572 | -0.13217472  | 0.7987 | No |
| row_1868 | CPEB4   | cytoplasmic polyadenylation element binding protein 4        | 21071 | -0.563577 | -0.13220164  | 0.7974 | No |
| row_1869 | CNOT7   | CCR4-NOT transcription complex, subunit 7                    | 21075 | -0.564456 | -0.13164583  | 0.7971 | No |
| row_1870 | REL     | reticuloendotheliosis oncogene                               | 21096 | -0.571629 | -0.13190511  | 0.6806 | No |
| row_1871 | COTL1   | coactosin-like 1 (Dictyostelium)                             | 21098 | -0.572078 | -0.13124289  | 0.7226 | No |
| row_1872 | APP     | amyloid beta (A4) precursor protein                          | 21105 | -0.572896 | -0.130822    | 0.7538 | No |
| row_1873 | SORBS1  | sorbin and SH3 domain containing 1                           | 21109 | -0.573310 | -0.13025519  | 0.7943 | No |
| row_1874 | TM9SF2  | transmembrane 9 superfamily member 2                         | 21110 | -0.573393 | -0.12954287  | 0.7935 | No |
| row_1875 | PSMD11  | proteasome (prosome, macropain) 26S subunit, non-ATPase,     | 21112 | -0.573451 | -0.12887894  | 0.7942 | No |
| row_1876 | CDC42   | cell division cycle 42 homolog (S. cerevisiae)               | 21113 | -0.573787 | -0.12816612  | 0.7941 | No |
| row_1877 | RTN3    | reticulon 3                                                  | 21129 | -0.576323 | -0.12817721  | 0.7933 | No |
| row_1878 | PDE4B   | phosphodiesterase 4B, cAMP specific                          | 21135 | -0.578586 | -0.12770079  | 0.7198 | No |
| row_1879 | CSNK2A1 | casein kinase II, alpha 1 polypeptide                        | 21150 | -0.580346 | -0.12765841  | 0.7920 | No |
| row_1880 | CRI1    | CREBBP/EP300 inhibitory protein 1                            | 21161 | -0.582099 | -0.12741998  | 0.7914 | No |
| row_1881 | SGPP1   | sphingosine-1-phosphate phosphatase 1                        | 21175 | -0.583578 | -0.12732512  | 0.7699 | No |
| row_1882 | MINPP1  | multiple inositol polyphosphate histidine phosphatase 1      | 21190 | -0.585923 | -0.12727581  | 0.7902 | No |
| row_1883 | ETS1    | E26 avian leukemia oncogene 1, 5' domain                     | 21196 | -0.587017 | -0.12678891  | 0.7899 | No |
| row_1884 | SPIN    | spindlin                                                     | 21201 | -0.587764 | -0.12625262  | 0.7754 | No |
| row_1885 | ACO1    | aconitase 1                                                  | 21206 | -0.589805 | -0.12571378  | 0.7186 | No |
| row_1886 | YWHAZ   | tyrosine 3-monooxygenase/tryptophan 5-monooxygenase acti     | 21220 | -0.592568 | -0.12560776  | 0.7881 | No |
| row_1887 | PSME4   | proteasome (prosome, macropain) activator subunit 4          | 21233 | -0.595292 | -0.12544987  | 0.7872 | No |
| row_1888 | EGLN3   | EGL nine homolog 3 (C. elegans)                              | 21239 | -0.596729 | -0.12495091  | 0.7188 | No |
| row_1889 | RAB2    | RAB2, member RAS oncogene family                             | 21245 | -0.597787 | -0.12445063  | 0.7864 | No |
| row_1890 | CAPZA2  | capping protein (actin filament) muscle Z-line, alpha 2      | 21249 | -0.598407 | -0.12385264  | 0.7862 | No |
| row_1891 | PAPOLA  | poly (A) polymerase alpha                                    | 21260 | -0.600994 | -0.12359073  | 0.7854 | No |
| row_1892 | CALR    | calreticulin                                                 | 21262 | -0.601496 | -0.12289196  | 0.7852 | No |
| row_1893 | EIF2S2  | eukaryotic translation initiation factor 2, subunit 2 (beta) | 21268 | -0.602980 | -0.12238523  | 0.7848 | No |
| row_1894 | CCT3    | chaperonin subunit 3 (gamma)                                 | 21269 | -0.603241 | -0.121635824 | 0.7847 | No |
| row_1895 | TM9SF2  | transmembrane 9 superfamily member 2                         | 21293 | -0.607843 | -0.12199552  | 0.7696 | No |
| row_1896 | SEC63   | SEC63-like (S. cerevisiae)                                   | 21326 | -0.614672 | -0.12278298  | 0.7684 | No |
| row_1897 | GOLGA4  | golgi autoantigen, golgin subfamily a, 4                     | 21329 | -0.615366 | -0.122115456 | 0.7537 | No |
| row_1898 | SPINT1  | serine protease inhibitor, Kunitz type 1                     | 21335 | -0.616101 | -0.121592425 | 0.7298 | No |
| row_1899 | TUBA4   | tubulin, alpha 4                                             | 21343 | -0.617190 | -0.12116498  | 0.6807 | No |
| row_1900 | PPP1CB  | protein phosphatase 1, catalytic subunit, beta isoform       | 21347 | -0.618062 | -0.12054257  | 0.7720 | No |
| row_1901 | HIPK3   | homeodomain interacting protein kinase 3                     | 21355 | -0.620454 | -0.12011108  | 0.7792 | No |
| row_1902 | ASPH    | aspartate-beta-hydroxylase                                   | 21358 | -0.620814 | -0.11943678  | 0.7460 | No |
| row_1903 | KIF1B   | kinesin family member 1B                                     | 21373 | -0.622874 | -0.119341575 | 0.7441 | No |
| row_1904 | NUPL1   | nucleoporin like 1                                           | 21375 | -0.623821 | -0.11861507  | 0.7737 | No |
| row_1905 | RNGTT   | RNA guanylyltransferase and 5'-phosphatase                   | 21379 | -0.624711 | -0.1179844   | 0.7779 | No |
| row_1906 | FECH    | ferrochelatase                                               | 21382 | -0.625823 | -0.11730388  | 0.7775 | No |
| row_1907 | PPP6C   | protein phosphatase 6, catalytic subunit                     | 21395 | -0.628736 | -0.11710445  | 0.7766 | No |
| row_1908 | GOLGA7  | golgi autoantigen, golgin subfamily a, 7                     | 21401 | -0.630020 | -0.116564125 | 0.7762 | No |
| row_1909 | PPP2R5C | protein phosphatase 2, regulatory subunit B (B56), gamma isc | 21403 | -0.630274 | -0.11582961  | 0.7761 | No |

|          |          |                                                              |       |           |              |        |    |
|----------|----------|--------------------------------------------------------------|-------|-----------|--------------|--------|----|
| row_1910 | PRDM1    | PR domain containing 1, with ZNF domain                      | 21408 | -0.631317 | -0.1152392   | 0.5178 | No |
| row_1911 | PERP     | PERP, TP53 apoptosis effector                                | 21414 | -0.633798 | -0.114694186 | 0.7327 | No |
| row_1912 | HRB      | HIV-1 Rev binding protein                                    | 21437 | -0.639219 | -0.11496644  | 0.7733 | No |
| row_1913 | MGEA5    | meningioma expressed antigen 5 (hyaluronidase)               | 21442 | -0.640147 | -0.11436507  | 0.7730 | No |
| row_1914 | ALCAM    | activated leukocyte cell adhesion molecule                   | 21453 | -0.642600 | -0.11405147  | 0.7722 | No |
| row_1915 | IL7      | interleukin 7                                                | 21458 | -0.642946 | -0.11344662  | 0.6693 | No |
| row_1916 | RDX      | radixin                                                      | 21462 | -0.643912 | -0.1127921   | 0.7462 | No |
| row_1917 | YWHAZ    | tyrosine 3-monooxygenase/tryptophan 5-monooxygenase acti     | 21463 | -0.644149 | -0.111991875 | 0.7717 | No |
| row_1918 | FUSIP1   | FUS interacting protein (serine-arginine rich) 1             | 21464 | -0.644312 | -0.111191444 | 0.7533 | No |
| row_1919 | PTPN2    | protein tyrosine phosphatase, non-receptor type 2            | 21502 | -0.650091 | -0.11217725  | 0.6896 | No |
| row_1920 | LAMP2    | lysosomal membrane glycoprotein 2                            | 21504 | -0.650120 | -0.111418076 | 0.7699 | No |
| row_1921 | GAS2     | growth arrest specific 2                                     | 21505 | -0.651080 | -0.11060924  | 0.7696 | No |
| row_1922 | SPATA6   | spermatogenesis associated 6                                 | 21507 | -0.651326 | -0.10984857  | 0.7141 | No |
| row_1923 | EIF2S2   | eukaryotic translation initiation factor 2, subunit 2 (beta) | 21522 | -0.654607 | -0.109713934 | 0.7685 | No |
| row_1924 | BECN1    | beclin 1 (coiled-coil, myosin-like BCL2-interacting protein) | 21541 | -0.660196 | -0.109766245 | 0.7667 | No |
| row_1925 | ABCC5    | ATP-binding cassette, sub-family C (CFTR/MRP), member 5      | 21547 | -0.662687 | -0.10918534  | 0.6279 | No |
| row_1926 | KIF5B    | kinesin family member 5B                                     | 21554 | -0.663662 | -0.1086517   | 0.7092 | No |
| row_1927 | KHDRBS1  | KH domain containing, RNA binding, signal transduction asso  | 21570 | -0.667353 | -0.10854971  | 0.7111 | No |
| row_1928 | SH3BGR1  | SH3-binding domain glutamic acid-rich protein like           | 21581 | -0.669832 | -0.10820228  | 0.7353 | No |
| row_1929 | HIF1A    | hypoxia inducible factor 1, alpha subunit                    | 21588 | -0.671387 | -0.107659034 | 0.7528 | No |
| row_1930 | IVNS1ABP | influenza virus NS1A binding protein                         | 21590 | -0.671970 | -0.106872715 | 0.7631 | No |
| row_1931 | SFRS1    | splicing factor, arginine/serine-rich 1 (ASF/SF2)            | 21592 | -0.673406 | -0.106084615 | 0.7398 | No |
| row_1932 | SPTLC1   | serine palmitoyltransferase, long chain base subunit 1       | 21593 | -0.673416 | -0.10524803  | 0.7396 | No |
| row_1933 | ROCK1    | Rho-associated coiled-coil forming kinase 1                  | 21611 | -0.677392 | -0.1052305   | 0.7614 | No |
| row_1934 | PPP1CB   | protein phosphatase 1, catalytic subunit, beta isoform       | 21613 | -0.678046 | -0.104436636 | 0.7612 | No |
| row_1935 | NONO     | non-POU-domain-containing, octamer binding protein           | 21617 | -0.678419 | -0.10373925  | 0.7611 | No |
| row_1936 | TAX1BP1  | Tax1 (human T-cell leukemia virus type I) binding protein 1  | 21618 | -0.679141 | -0.10289555  | 0.7459 | No |
| row_1937 | CPOX     | coproporphyrinogen oxidase                                   | 21623 | -0.679792 | -0.10224492  | 0.6574 | No |
| row_1938 | HNRPAB   | heterogeneous nuclear ribonucleoprotein A/B                  | 21624 | -0.679804 | -0.101400405 | 0.7478 | No |
| row_1939 | DSTN     | destrin                                                      | 21632 | -0.682289 | -0.10089209  | 0.7599 | No |
| row_1940 | NEDD9    | neural precursor cell expressed, developmentally down-regula | 21634 | -0.682482 | -0.10009271  | 0.7598 | No |
| row_1941 | ARF3     | ADP-ribosylation factor 3                                    | 21639 | -0.684470 | -0.099436276 | 0.7592 | No |
| row_1942 | CEACAM1  | CEA-related cell adhesion molecule 1                         | 21645 | -0.685410 | -0.09882714  | 0.7589 | No |
| row_1943 | RAD21    | RAD21 homolog (S. pombe)                                     | 21647 | -0.685585 | -0.09802391  | 0.7420 | No |
| row_1944 | CCR2     | chemokine (C-C motif) receptor 2                             | 21651 | -0.687044 | -0.0973158   | 0.6159 | No |
| row_1945 | STRN3    | striatin, calmodulin binding protein 3                       | 21667 | -0.692417 | -0.097182676 | 0.7567 | No |
| row_1946 | MTPN     | myotrophin                                                   | 21672 | -0.693616 | -0.09651487  | 0.6963 | No |
| row_1947 | ACTR3    | ARP3 actin-related protein 3 homolog (yeast)                 | 21697 | -0.699713 | -0.09680892  | 0.7530 | No |
| row_1948 | RAD21    | RAD21 homolog (S. pombe)                                     | 21700 | -0.699838 | -0.09603645  | 0.6979 | No |
| row_1949 | CFL2     | cofilin 2, muscle                                            | 21705 | -0.700726 | -0.09535982  | 0.7542 | No |
| row_1950 | KIF3A    | kinesin family member 3A                                     | 21707 | -0.701331 | -0.09453703  | 0.7098 | No |
| row_1951 | ETS1     | E26 avian leukemia oncogene 1, 5' domain                     | 21710 | -0.702474 | -0.09376128  | 0.7193 | No |
| row_1952 | IL7      | interleukin 7                                                | 21713 | -0.702828 | -0.0929851   | 0.7317 | No |
| row_1953 | GLCC1    | glucocorticoid induced transcript 1                          | 21722 | -0.705045 | -0.09249698  | 0.7528 | No |
| row_1954 | FUS      | fusion, derived from t(12;16) malignant liposarcoma (human)  | 21735 | -0.707652 | -0.09219952  | 0.7520 | No |
| row_1955 | ROD1     | ROD1 regulator of differentiation 1 (S. pombe)               | 21742 | -0.709959 | -0.09160836  | 0.6549 | No |
| row_1956 | TRAF3    | Tnf receptor-associated factor 3                             | 21752 | -0.712552 | -0.09115939  | 0.7294 | No |

|          |          |                                                                      |       |           |              |        |    |
|----------|----------|----------------------------------------------------------------------|-------|-----------|--------------|--------|----|
| row_1957 | KIF5B    | kinesin family member 5B                                             | 21769 | -0.718270 | -0.091042615 | 0.6944 | No |
| row_1958 | YWHAQ    | tyrosine 3-monooxygenase/tryptophan 5-monooxygenase acti             | 21770 | -0.718291 | -0.090150274 | 0.7171 | No |
| row_1959 | PTDSS1   | phosphatidylserine synthase 1                                        | 21773 | -0.719127 | -0.089353845 | 0.7053 | No |
| row_1960 | 2-Sep    | septin 2                                                             | 21775 | -0.720077 | -0.088507764 | 0.7482 | No |
| row_1961 | TFPI     | tissue factor pathway inhibitor                                      | 21778 | -0.720603 | -0.0877095   | 0.7481 | No |
| row_1962 | ALDH1A1  | aldehyde dehydrogenase family 1, subfamily A1                        | 21797 | -0.727370 | -0.08767836  | 0.6478 | No |
| row_1963 | CSNK2A1  | casein kinase II, alpha 1 polypeptide                                | 21802 | -0.729328 | -0.086966194 | 0.7116 | No |
| row_1964 | XBP1     | X-box binding protein 1                                              | 21810 | -0.731167 | -0.08639716  | 0.7312 | No |
| row_1965 | ROCK1    | Rho-associated coiled-coil forming kinase 1                          | 21828 | -0.737599 | -0.08630484  | 0.7429 | No |
| row_1966 | MTMR6    | myotubularin related protein 6                                       | 21840 | -0.743885 | -0.08591389  | 0.7410 | No |
| row_1967 | DDX3Y    | DEAD (Asp-Glu-Ala-Asp) box polypeptide 3, Y-linked                   | 21841 | -0.744116 | -0.08498947  | 0.7409 | No |
| row_1968 | RORA     | RAR-related orphan receptor alpha                                    | 21878 | -0.754296 | -0.085797355 | 0.7378 | No |
| row_1969 | ULK2     | Unc-51 like kinase 2 (C. elegans)                                    | 21881 | -0.755153 | -0.08495617  | 0.7376 | No |
| row_1970 | PPP3R1   | protein phosphatase 3, regulatory subunit B, alpha isoform (c        | 21903 | -0.763411 | -0.08502567  | 0.7117 | No |
| row_1971 | LAMP2    | lysosomal membrane glycoprotein 2                                    | 21913 | -0.767822 | -0.08450804  | 0.7338 | No |
| row_1972 | CSF1R    | colony stimulating factor 1 receptor                                 | 21920 | -0.769613 | -0.08384277  | 0.7299 | No |
| row_1973 | HNRPU    | Heterogeneous nuclear ribonucleoprotein U                            | 21926 | -0.771677 | -0.08312646  | 0.7260 | No |
| row_1974 | 7-Sep    | septin 7                                                             | 21959 | -0.784945 | -0.08370239  | 0.6613 | No |
| row_1975 | SERPINB9 | serine (or cysteine) peptidase inhibitor, clade B, member 9          | 21969 | -0.787528 | -0.08316028  | 0.6436 | No |
| row_1976 | EMB      | embigin                                                              | 21975 | -0.789569 | -0.08242175  | 0.7272 | No |
| row_1977 | ETF1     | eukaryotic translation termination factor 1                          | 21987 | -0.794979 | -0.081967324 | 0.5983 | No |
| row_1978 | MTMR6    | myotubularin related protein 6                                       | 21998 | -0.799563 | -0.08145873  | 0.7026 | No |
| row_1979 | TCERG1   | transcription elongation regulator 1 (CA150)                         | 22014 | -0.807140 | -0.08118308  | 0.7220 | No |
| row_1980 | RANBP9   | RAN binding protein 9                                                | 22021 | -0.810073 | -0.08046755  | 0.6998 | No |
| row_1981 | PPP1CB   | protein phosphatase 1, catalytic subunit, beta isoform               | 22033 | -0.816240 | -0.079986714 | 0.7007 | No |
| row_1982 | CNN3     | Calponin 3, acidic                                                   | 22059 | -0.829173 | -0.080168396 | 0.7155 | No |
| row_1983 | SLC12A6  | solute carrier family 12, member 6                                   | 22113 | -0.857201 | -0.081672445 | 0.6274 | No |
| row_1984 | ATP2A2   | ATPase, Ca <sup>++</sup> transporting, cardiac muscle, slow twitch 2 | 22115 | -0.857774 | -0.0806553   | 0.6584 | No |
| row_1985 | CSF1R    | colony stimulating factor 1 receptor                                 | 22117 | -0.860862 | -0.079634316 | 0.7062 | No |
| row_1986 | BMPR1A   | bone morphogenetic protein receptor, type 1A                         | 22119 | -0.861612 | -0.07861241  | 0.5546 | No |
| row_1987 | XBP1     | X-box binding protein 1                                              | 22124 | -0.863069 | -0.0777341   | 0.6226 | No |
| row_1988 | VAV3     | vav 3 oncogene                                                       | 22127 | -0.865801 | -0.07675546  | 0.7048 | No |
| row_1989 | ANKRD10  | ankyrin repeat domain 10                                             | 22130 | -0.866745 | -0.07577564  | 0.6865 | No |
| row_1990 | MTMR6    | myotubularin related protein 6                                       | 22133 | -0.870573 | -0.07479106  | 0.6758 | No |
| row_1991 | CALR     | calreticulin                                                         | 22140 | -0.875756 | -0.073993936 | 0.5922 | No |
| row_1992 | ATF2     | activating transcription factor 2                                    | 22141 | -0.876695 | -0.07290481  | 0.6493 | No |
| row_1993 | HNRPAB   | heterogeneous nuclear ribonucleoprotein A/B                          | 22145 | -0.879726 | -0.07195734  | 0.7008 | No |
| row_1994 | LCN2     | lipocalin 2                                                          | 22148 | -0.880651 | -0.070960246 | 0.6599 | No |
| row_1995 | SPATA6   | spermatogenesis associated 6                                         | 22150 | -0.881525 | -0.069913596 | 0.6909 | No |
| row_1996 | ACP1     | acid phosphatase 1, soluble                                          | 22155 | -0.883551 | -0.06900984  | 0.6615 | No |
| row_1997 | HMGCR    | 3-hydroxy-3-methylglutaryl-Coenzyme A reductase                      | 22183 | -0.899193 | -0.069201484 | 0.6951 | No |
| row_1998 | GTPBP4   | GTP binding protein 4                                                | 22184 | -0.899222 | -0.068084374 | 0.6926 | No |
| row_1999 | WDR26    | WD repeat domain 26                                                  | 22185 | -0.900485 | -0.0669657   | 0.6948 | No |
| row_2000 | ABI1     | abl-interactor 1                                                     | 22194 | -0.903788 | -0.06623069  | 0.6938 | No |
| row_2001 | HRB      | HIV-1 Rev binding protein                                            | 22202 | -0.908569 | -0.065441266 | 0.6925 | No |
| row_2002 | API5     | apoptosis inhibitor 5                                                | 22205 | -0.909612 | -0.0644082   | 0.6109 | No |
| row_2003 | CDADC1   | cytidine and dCMP deaminase domain containing 1                      | 22215 | -0.917390 | -0.06370476  | 0.6669 | No |

|          |         |                                                             |       |           |              |        |    |
|----------|---------|-------------------------------------------------------------|-------|-----------|--------------|--------|----|
| row_2004 | WEE1    | wee 1 homolog (S. pombe)                                    | 22222 | -0.919011 | -0.062853895 | 0.6895 | No |
| row_2005 | DDR1    | discoidin domain receptor family, member 1                  | 22233 | -0.924204 | -0.06219046  | 0.5904 | No |
| row_2006 | CD2AP   | CD2-associated protein                                      | 22250 | -0.936177 | -0.061802976 | 0.6803 | No |
| row_2007 | ATP6V0C | ATPase, H+ transporting, lysosomal V0 subunit C             | 22256 | -0.940561 | -0.06087687  | 0.5318 | No |
| row_2008 | RPL30   | ribosomal protein L30                                       | 22259 | -0.943347 | -0.059801888 | 0.6826 | No |
| row_2009 | YWHAZ   | tyrosine 3-monooxygenase/tryptophan 5-monooxygenase acti    | 22273 | -0.950218 | -0.05925155  | 0.5633 | No |
| row_2010 | CREM    | cAMP responsive element modulator                           | 22276 | -0.953172 | -0.058164366 | 0.5541 | No |
| row_2011 | GNAI3   | guanine nucleotide binding protein, alpha inhibiting 3      | 22284 | -0.957597 | -0.057314035 | 0.6712 | No |
| row_2012 | EMB     | embigin                                                     | 22303 | -0.969260 | -0.056982394 | 0.6407 | No |
| row_2013 | DDR1    | discoidin domain receptor family, member 1                  | 22319 | -0.980708 | -0.056491118 | 0.4005 | No |
| row_2014 | PA2G4   | proliferation-associated 2G4                                | 22322 | -0.982429 | -0.055367585 | 0.6604 | No |
| row_2015 | LY86    | lymphocyte antigen 86                                       | 22332 | -0.987871 | -0.054576587 | 0.4888 | No |
| row_2016 | RNF13   | ring finger protein 13                                      | 22346 | -0.998765 | -0.05396594  | 0.5885 | No |
| row_2017 | CHD1    | chromodomain helicase DNA binding protein 1                 | 22351 | -1.001518 | -0.052915633 | 0.6662 | No |
| row_2018 | ARF4    | ADP-ribosylation factor 4                                   | 22354 | -1.005013 | -0.051764045 | 0.5840 | No |
| row_2019 | SCOTIN  | scotin gene                                                 | 22359 | -1.011147 | -0.05070178  | 0.6636 | No |
| row_2020 | SLCO2A1 | solute carrier organic anion transporter family, member 2a1 | 22373 | -1.025653 | -0.050057728 | 0.3348 | No |
| row_2021 | CAMK2D  | calcium/calmodulin-dependent protein kinase II, delta       | 22380 | -1.036267 | -0.049061194 | 0.6567 | No |
| row_2022 | EGLN3   | EGL nine homolog 3 (C. elegans)                             | 22381 | -1.037227 | -0.047772646 | 0.6564 | No |
| row_2023 | CDADC1  | cytidine and dCMP deaminase domain containing 1             | 22391 | -1.046167 | -0.046909224 | 0.6167 | No |
| row_2024 | ELL2    | elongation factor RNA polymerase II 2                       | 22395 | -1.051734 | -0.045748066 | 0.6523 | No |
| row_2025 | ASPA    | aspartoacylase (aminoacylase) 2                             | 22398 | -1.055745 | -0.044533454 | 0.4944 | No |
| row_2026 | PLS3    | plastin 3 (T-isoform)                                       | 22399 | -1.055879 | -0.04322173  | 0.6198 | No |
| row_2027 | HMGCS1  | 3-hydroxy-3-methylglutaryl-Coenzyme A synthase 1            | 22408 | -1.068050 | -0.042282656 | 0.6249 | No |
| row_2028 | FUSIP1  | FUS interacting protein (serine-arginine rich) 1            | 22412 | -1.071595 | -0.041096825 | 0.6348 | No |
| row_2029 | SELL    | selectin, lymphocyte                                        | 22418 | -1.078348 | -0.039999545 | 0.6452 | No |
| row_2030 | CCNC    | cyclin C                                                    | 22422 | -1.085337 | -0.03879664  | 0.6433 | No |
| row_2031 | EIF4G2  | eukaryotic translation initiation factor 4, gamma 2         | 22429 | -1.098280 | -0.03772307  | 0.4785 | No |
| row_2032 | USP14   | Ubiquitin specific peptidase 14                             | 22456 | -1.131978 | -0.03757705  | 0.5165 | No |
| row_2033 | UBE2D2  | ubiquitin-conjugating enzyme E2D 2                          | 22459 | -1.136245 | -0.03626243  | 0.5583 | No |
| row_2034 | GPR65   | G-protein coupled receptor 65                               | 22466 | -1.147640 | -0.03512754  | 0.6266 | No |
| row_2035 | WDR13   | WD repeat domain 13                                         | 22472 | -1.164425 | -0.033923324 | 0.6222 | No |
| row_2036 | SNX5    | sorting nexin 5                                             | 22474 | -1.166334 | -0.032522857 | 0.5524 | No |
| row_2037 | SQLE    | squalene epoxidase                                          | 22484 | -1.187263 | -0.031484157 | 0.6134 | No |
| row_2038 | CTSS    | cathepsin S                                                 | 22487 | -1.190072 | -0.030102666 | 0.5089 | No |
| row_2039 | HMGCS1  | 3-hydroxy-3-methylglutaryl-Coenzyme A synthase 1            | 22493 | -1.197355 | -0.028857544 | 0.6136 | No |
| row_2040 | PTGER3  | prostaglandin E receptor 3 (subtype EP3)                    | 22500 | -1.213803 | -0.027640458 | 0.6093 | No |
| row_2041 | ASPH    | aspartate-beta-hydroxylase                                  | 22504 | -1.223455 | -0.02626597  | 0.6068 | No |
| row_2042 | SELL    | selectin, lymphocyte                                        | 22510 | -1.235067 | -0.024973998 | 0.6038 | No |
| row_2043 | MAP2K5  | mitogen activated protein kinase kinase 5                   | 22513 | -1.237581 | -0.02353349  | 0.5789 | No |
| row_2044 | SCOTIN  | scotin gene                                                 | 22530 | -1.272670 | -0.02272798  | 0.5464 | No |
| row_2045 | PSMA1   | proteasome (prosome, macropain) subunit, alpha type 1       | 22535 | -1.280029 | -0.02133168  | 0.5923 | No |
| row_2046 | BCL6    | B-cell leukemia/lymphoma 6                                  | 22549 | -1.313522 | -0.020330008 | 0.5583 | No |
| row_2047 | ETS1    | E26 avian leukemia oncogene 1, 5' domain                    | 22551 | -1.319518 | -0.018739238 | 0.5636 | No |
| row_2048 | CD2AP   | CD2-associated protein                                      | 22557 | -1.329968 | -0.017329369 | 0.5693 | No |
| row_2049 | MYO6    | myosin VI                                                   | 22561 | -1.347982 | -0.015800182 | 0.5500 | No |
| row_2050 | CENTD1  | centaurin, delta 1                                          | 22563 | -1.349588 | -0.014172056 | 0.5494 | No |

|          |       |                                         |       |           |              |        |    |
|----------|-------|-----------------------------------------|-------|-----------|--------------|--------|----|
| row_2051 | IDI1  | isopentenyl-diphosphate delta isomerase | 22568 | -1.363681 | -0.012671834 | 0.5714 | No |
| row_2052 | IRF6  | interferon regulatory factor 6          | 22612 | -1.575029 | -0.012799413 | 0.5099 | No |
| row_2053 | CNN3  | calponin 3, acidic                      | 22653 | -1.883510 | -0.012398354 | 0.2623 | No |
| row_2054 | VPS54 | Vacuolar protein sorting 54 (yeast)     | 22658 | -1.937028 | -0.010185862 | 0.4415 | No |
| row_2055 | CNN3  | calponin 3, acidic                      | 22670 | -2.127962 | -0.008075469 | 0.1626 | No |
| row_2056 | CNN3  | calponin 3, acidic                      | 22680 | -2.348309 | -0.005594396 | 0.1963 | No |
| row_2057 | CNN3  | calponin 3, acidic                      | 22681 | -2.354855 | -0.002668954 | 0.1466 | No |
| row_2058 | CNN3  | calponin 3, acidic                      | 22683 | -2.421435 | 0.000291     | 0.2186 | No |

**TABLE S3** Chambers UPWITHAGE\_HSC\_OVERLAP

Upregulated in class  
 GeneSet OTT1KO  
 UPWITHAGE\_HSC\_OVERLAP  
 Enrichment Score (ES) 0.5688053  
 Normalized Enrichment Score (NES) 2.0203335  
 Nominal p-value 0  
 FDR q-value 0  
 FWER p-Value 0

| NAME   | GENE    | GENE_TITLE                                                          | RANK      | RANK METRIC | CORE       |             |            |
|--------|---------|---------------------------------------------------------------------|-----------|-------------|------------|-------------|------------|
|        |         |                                                                     | GENE LIST | SCORE       | RUNNING ES | Fold Change | ENRICHMENT |
| row_0  | SULT1A1 | sulfotransferase family, cytosolic, 1A, phenol-preferring, member 1 | 17        | 2.14448     | 0.04882    | 3.3821      | Yes        |
| row_1  | BGN     | biglycan                                                            | 28        | 1.88969     | 0.09220    | 2.4381      | Yes        |
| row_2  | DUSP3   | dual specificity phosphatase 3                                      | 47        | 1.74487     | 0.13162    | 2.0721      | Yes        |
| row_3  | JAM2    | junctional adhesion molecule 2                                      | 48        | 1.72906     | 0.17198    | 1.5392      | Yes        |
| row_4  | null    | null                                                                | 52        | 1.70834     | 0.21164    | 2.4907      | Yes        |
| row_5  | PPIC    | peptidylprolyl isomerase C (cyclophilin C)                          | 57        | 1.64038     | 0.24964    | 1.9765      | Yes        |
| row_6  | FZD3    | frizzled homolog 3 (Drosophila)                                     | 62        | 1.62711     | 0.28733    | 1.9648      | Yes        |
| row_7  | F11R    | F11 receptor                                                        | 93        | 1.48364     | 0.31978    | 1.8438      | Yes        |
| row_8  | GSTM2   | glutathione S-transferase M2 (muscle)                               | 125       | 1.37800     | 0.34969    | 3.5219      | Yes        |
| row_9  | TM4SF1  | transmembrane 4 L six family member 1                               | 236       | 1.13776     | 0.36823    | 2.9735      | Yes        |
| row_10 | EHD4    | EH-domain containing 4                                              | 287       | 1.07587     | 0.38970    | 1.5483      | Yes        |
| row_11 | CRTAP   | cartilage associated protein                                        | 318       | 1.04508     | 0.41191    | 1.5448      | Yes        |
| row_12 | FHL1    | four and a half LIM domains 1                                       | 421       | 0.95706     | 0.42682    | 1.6106      | Yes        |
| row_13 | F2R     | coagulation factor II (thrombin) receptor                           | 513       | 0.88886     | 0.44093    | 1.5341      | Yes        |
| row_14 | MUC13   | mucin 13, cell surface associated                                   | 589       | 0.84233     | 0.45513    | 1.4052      | Yes        |
| row_15 | CTF1    | cardiotrophin 1                                                     | 598       | 0.83752     | 0.47410    | 1.4367      | Yes        |
| row_16 | FKBP9   | FK506 binding protein 9, 63 kDa                                     | 694       | 0.78324     | 0.48546    | 1.6591      | Yes        |
| row_17 | FOXA3   | forkhead box A3                                                     | 743       | 0.76474     | 0.49981    | 1.6030      | Yes        |
| row_18 | NR4A2   | nuclear receptor subfamily 4, group A, member 2                     | 755       | 0.76204     | 0.51680    | 2.0244      | Yes        |
| row_19 | BHLHB2  | basic helix-loop-helix domain containing, class B, 2                | 813       | 0.74003     | 0.52992    | 1.3474      | Yes        |
| row_20 | PTGS2   | prostaglandin-endoperoxide synthase 2                               | 826       | 0.73047     | 0.54609    | 2.1276      | Yes        |
| row_21 | NBEA    | neurobeachin                                                        | 945       | 0.68700     | 0.55353    | 1.7413      | Yes        |
| row_22 | ITGA6   | integrin, alpha 6                                                   | 1105      | 0.63621     | 0.55679    | 1.5505      | Yes        |
| row_23 | HBEGF   | heparin-binding EGF-like growth factor                              | 1156      | 0.62154     | 0.56766    | 1.2839      | Yes        |
| row_24 | VLDLR   | very low density lipoprotein receptor                               | 1327      | 0.57995     | 0.56881    | 1.3200      | Yes        |
| row_25 | PVR     | poliovirus receptor                                                 | 1688      | 0.51213     | 0.55452    | 1.2308      | No         |
| row_26 | ASB4    | ankyrin repeat and SOCS box-containing 4                            | 2115      | 0.44702     | 0.53391    | 1.5318      | No         |

|        |           |                                                                    |       |          |          |         |    |
|--------|-----------|--------------------------------------------------------------------|-------|----------|----------|---------|----|
| row_27 | CASP12    | caspase 12                                                         | 2236  | 0.42891  | 0.53518  | 1.2931  | No |
| row_28 | NDN       | necladin homolog (mouse)                                           | 2313  | 0.41909  | 0.53942  | 1.4435  | No |
| row_29 | TRPC1     | transient receptor potential cation channel, subfamily C, member 1 | 3292  | 0.31221  | 0.47543  | 1.1466  | No |
| row_30 | ZFP36     | zinc finger protein 36, C3H type, homolog (mouse)                  | 3324  | 0.30895  | 0.48038  | 1.2593  | No |
| row_31 | SOCS3     | suppressor of cytokine signaling 3                                 | 3388  | 0.30374  | 0.48288  | 1.5911  | No |
| row_32 | null      | null                                                               | 3851  | 0.26033  | 0.45529  | 1.1461  | No |
| row_33 | PLSCR2    | phospholipid scramblase 2                                          | 3997  | 0.24861  | 0.45052  | 1.1757  | No |
| row_34 | UBE2E2    | ubiquitin-conjugating enzyme E2E 2 (UBC4/5 homolog, yeast)         | 4065  | 0.24344  | 0.45132  | 1.1024  | No |
| row_35 | DSG2      | desmoglein 2                                                       | 4368  | 0.22041  | 0.43446  | 1.0961  | No |
| row_36 | STAT4     | signal transducer and activator of transcription 4                 | 5116  | 0.16612  | 0.38389  | 1.0899  | No |
| row_37 | IER3      | immediate early response 3                                         | 5474  | 0.14309  | 0.36122  | 1.1458  | No |
| row_38 | EGR1      | early growth response 1                                            | 6002  | 0.10870  | 0.32534  | 1.0859  | No |
| row_39 | MEIS1     | Meis1, myeloid ecotropic viral integration site 1 homolog (mouse)  | 6146  | 0.09911  | 0.31724  | 1.0404  | No |
| row_40 | RIPK4     | receptor-interacting serine-threonine kinase 4                     | 6252  | 0.09248  | 0.31174  | 1.0599  | No |
| row_41 | RPL23     | ribosomal protein L23                                              | 6591  | 0.07111  | 0.28877  | 1.0289  | No |
| row_42 | CSNK1E    | casein kinase 1, epsilon                                           | 6605  | 0.07026  | 0.28946  | 1.2614  | No |
| row_43 | FKBP1A    | FK506 binding protein 1A, 12kDa                                    | 6687  | 0.06437  | 0.28506  | 1.1152  | No |
| row_44 | FOS       | v-fos FBJ murine osteosarcoma viral oncogene homolog               | 7032  | 0.04135  | 0.26095  | 1.0389  | No |
| row_45 | TSC22D1   | TSC22 domain family, member 1                                      | 7065  | 0.03969  | 0.25955  | 1.0381  | No |
| row_46 | RBBP6     | retinoblastoma binding protein 6                                   | 7146  | 0.03428  | 0.25452  | 1.0138  | No |
| row_47 | MPL       | myeloproliferative leukemia virus oncogene                         | 7480  | 0.01637  | 0.23063  | 1.3350  | No |
| row_48 | GABARAPL1 | GABA(A) receptor-associated protein like 1                         | 7917  | -0.00924 | 0.19907  | 1.0884  | No |
| row_49 | MARVELD2  | MARVEL domain containing 2                                         | 8303  | -0.03380 | 0.17180  | 1.0213  | No |
| row_50 | GRB10     | growth factor receptor-bound protein 10                            | 8366  | -0.03886 | 0.16819  | -1.0157 | No |
| row_51 | KLF9      | Kruppel-like factor 9                                              | 8747  | -0.06507 | 0.14201  | 1.1094  | No |
| row_52 | PFN2      | profilin 2                                                         | 9573  | -0.12303 | 0.08476  | 1.1661  | No |
| row_53 | DUSP16    | dual specificity phosphatase 16                                    | 10288 | -0.18316 | 0.03700  | -1.0867 | No |
| row_54 | ITGA3     | integrin, alpha 3                                                  | 10307 | -0.18469 | 0.04000  | -1.0191 | No |
| row_55 | ELTD1     | EGF, latrophilin and seven transmembrane domain containing 1       | 11068 | -0.25616 | -0.00941 | -1.0826 | No |
| row_56 | SMAD7     | SMAD, mothers against DPP homolog 7 (Drosophila)                   | 11355 | -0.28526 | -0.02360 | -1.1836 | No |
| row_57 | PLEK      | pleckstrin                                                         | 11375 | -0.28788 | -0.01826 | -1.1018 | No |
| row_58 | SLC6A15   | solute carrier family 6, member 15                                 | 11548 | -0.31015 | -0.02356 | -1.1586 | No |
| row_59 | TACSTD2   | tumor-associated calcium signal transducer 2                       | 11873 | -0.35376 | -0.03891 | -1.2952 | No |
| row_60 | NR1D2     | nuclear receptor subfamily 1, group D, member 2                    | 11911 | -0.35852 | -0.03324 | 1.0937  | No |
| row_61 | PGCP      | -                                                                  | 12332 | -0.43364 | -0.05373 | -1.1932 | No |
| row_62 | CREM      | cAMP responsive element modulator                                  | 12381 | -0.44186 | -0.04691 | 1.1509  | No |
| row_63 | PSMA8     | proteasome (prosome, macropain) subunit, alpha type, 8             | 13004 | -0.61138 | -0.07797 | -1.2786 | No |
| row_64 | ARMCX2    | armadillo repeat containing, X-linked 2                            | 13189 | -0.68759 | -0.07533 | 1.1313  | No |
| row_65 | EGLN3     | egl nine homolog 3 (C. elegans)                                    | 13591 | -1.03723 | -0.08035 | 1.1295  | No |
| row_66 | CRISPLD1  | cysteine-rich secretory protein LCCL domain containing 1           | 13655 | -1.18103 | -0.05737 | -1.3842 | No |
| row_67 | HLF       | hepatic leukemia factor                                            | 13686 | -1.29474 | -0.02933 | -1.5640 | No |
| row_68 | IRF6      | interferon regulatory factor 6                                     | 13733 | -1.57503 | 0.00408  | -1.9613 | No |



Table S4 Rossi UP WITH AGE  
 Upregulated in class OTT1KO  
 GeneSet ROSSI\_HSC\_UP\_WITH\_AGE  
 Enrichment Score (ES) 0.43606934  
 Normalized Enrichment Score (NES) 1.4566088  
 Nominal p-value 0  
 FDR q-value 0.11384977  
 FWER p-Value 0.051

| ROW | GENE SYMBOL | GENE_TITLE                                                                        | RANK      | RANK         | FOLD        | CORE          |
|-----|-------------|-----------------------------------------------------------------------------------|-----------|--------------|-------------|---------------|
|     |             |                                                                                   | GENE LIST | METRIC SCORE | RUNNING ES  | CHANGE ENRICH |
| 0   | CALML4      | calmodulin-like 4                                                                 | 5         | 2.982871056  | 0.023904394 | 5.0244 Yes    |
| 1   | GP1BB       | glycoprotein Ib (platelet), beta polypeptide                                      | 6         | 2.820400953  | 0.046856374 | 4.3838 Yes    |
| 2   | SELP        | selectin P (granule membrane protein 140kDa, antigen CD62)                        | 13        | 2.368881941  | 0.06569027  | 5.1390 Yes    |
| 3   | CLU         | clusterin                                                                         | 32        | 1.836074829  | 0.079300895 | 2.8111 Yes    |
| 4   | RAB27B      | RAB27B, member RAS oncogene family                                                | 45        | 1.748577356  | 0.092643164 | 2.0756 Yes    |
| 5   | JAM2        | junctional adhesion molecule 2                                                    | 48        | 1.729055882  | 0.10656606  | 3.1358 Yes    |
| 6   | SDPR        | serum deprivation response (phosphatidylserine binding protein)                   | 50        | 1.720258474  | 0.1204913   | 2.1741 Yes    |
| 7   | MUC1        | mucin 1, cell surface associated                                                  | 61        | 1.627312303  | 0.13299464  | 1.9737 Yes    |
| 8   | CLCA1       | chloride channel, calcium activated, family member 1                              | 67        | 1.598093867  | 0.14562993  | 3.2577 Yes    |
| 9   | NEO1        | neogenin homolog 1 (chicken)                                                      | 119       | 1.395663738  | 0.15321627  | 3.4948 Yes    |
| 10  | DYRK3       | dual-specificity tyrosine-(Y)-phosphorylation regulated kinase 3                  | 135       | 1.361783743  | 0.16318902  | 1.7486 Yes    |
| 11  | CYP4B1      | cytochrome P450, family 4, subfamily B, polypeptide 1                             | 138       | 1.354769826  | 0.17406604  | 1.9407 Yes    |
| 12  | PBX3        | pre-B-cell leukemia transcription factor 3                                        | 154       | 1.309645772  | 0.1836145   | 2.4242 Yes    |
| 13  | HOXB8       | homeobox B8                                                                       | 163       | 1.281020761  | 0.19344766  | 6.7707 Yes    |
| 14  | PLXNB2      | plexin B2                                                                         | 165       | 1.278396845  | 0.2037771   | 1.6870 Yes    |
| 15  | null        | null                                                                              | 182       | 1.241779566  | 0.21269935  | 2.8768 Yes    |
| 16  | CHST2       | carbohydrate (N-acetylglucosamine-6-O) sulfotransferase 2                         | 195       | 1.20455277   | 0.22161444  | 1.7463 Yes    |
| 17  | TRIM47      | tripartite motif-containing 47                                                    | 200       | 1.198181272  | 0.23106925  | 2.0722 Yes    |
| 18  | GDA         | guanine deaminase                                                                 | 206       | 1.187499285  | 0.2403632   | 2.1623 Yes    |
| 19  | SLC2A10     | solute carrier family 2 (facilitated glucose transporter), member 10              | 212       | 1.182801843  | 0.2496189   | 1.8744 Yes    |
| 20  | CYSLTR2     | cysteinyl leukotriene receptor 2                                                  | 242       | 1.132563472  | 0.25669104  | 1.7832 Yes    |
| 21  | KIF21A      | kinesin family member 21A                                                         | 354       | 1.011462688  | 0.25671393  | 1.5393 Yes    |
| 22  | COL18A1     | collagen, type XVIII, alpha 1                                                     | 395       | 0.982417524  | 0.26175076  | 2.1609 Yes    |
| 23  | PLXNC1      | plexin C1                                                                         | 417       | 0.961616993  | 0.26802334  | 1.5239 Yes    |
| 24  | FHL1        | four and a half LIM domains 1                                                     | 421       | 0.957055867  | 0.27558985  | 1.6106 Yes    |
| 25  | SDC2        | syndecan 2 (heparan sulfate proteoglycan 1, cell surface-associated, fibroglycan) | 432       | 0.947378635  | 0.28256     | 1.4675 Yes    |

|    |           |                                                                                      |      |             |             |            |        |     |
|----|-----------|--------------------------------------------------------------------------------------|------|-------------|-------------|------------|--------|-----|
| 26 | HOXB6     | homeobox B6                                                                          | 460  | 0.930071294 | 0.28813216  | 2.6062     | Yes    |     |
| 27 | FAP       | fibroblast activation protein, alpha                                                 | 499  | 0.901157141 | 0.29265562  | 1.7657     | Yes    |     |
| 28 | CXCL16    | chemokine (C-X-C motif) ligand 16                                                    | 512  | 0.89003551  | 0.2990112   | 1.5661     | Yes    |     |
| 29 | OSMR      | oncostatin M receptor                                                                | 581  | 0.850152135 | 0.30090114  | 1.6104     | Yes    |     |
| 30 | LOXL3     | lysyl oxidase-like 3                                                                 | 593  | 0.839127183 | 0.30691642  | 1.6280     | Yes    |     |
| 31 | null      | null                                                                                 | 595  | 0.838070631 | 0.31366253  | 1.4559     | Yes    |     |
| 32 | SLAMF1    | signaling lymphocytic activation molecule family member 1                            | 607  | 0.831776619 | 0.319618    | 2.4328     | Yes    |     |
| 33 | PTPRK     | protein tyrosine phosphatase, receptor type, K                                       | 613  | 0.829415917 | 0.3259979   | 1.4193     | Yes    |     |
| 34 | DHX40     | DEAH (Asp-Glu-Ala-His) box polypeptide 40                                            | 614  | 0.828204095 | 0.33273768  | 1.3970     | Yes    |     |
| 35 | SEC14L1   | SEC14-like 1 ( <i>S. cerevisiae</i> )                                                | 617  | 0.827347815 | 0.33932263  | 1.3966     | Yes    |     |
| 36 | DAG1      | dystroglycan 1 (dystrophin-associated glycoprotein 1)                                | 741  | 0.765222549 | 0.33645427  | 1.3614     | Yes    |     |
| 37 | NR4A2     | nuclear receptor subfamily 4, group A, member 2                                      | 755  | 0.762042463 | 0.34169433  | 1.3596     | Yes    |     |
| 38 | null      | null                                                                                 | 762  | 0.757939875 | 0.34741864  | 1.3573     | Yes    |     |
| 39 | EFEMP1    | EGF-containing fibulin-like extracellular matrix protein 1                           | 810  | 0.740361631 | 0.34996802  | 1.3959     | Yes    |     |
| 40 | null      | null                                                                                 | 887  | 0.705013514 | 0.35008526  | 2.8257     | Yes    |     |
| 41 | ATP8A1    | ATPase, aminophospholipid transporter (APLT), Class I, type 8A, member 1             | 922  | 0.692608059 | 0.35320735  | 1.3216     | Yes    |     |
| 42 | null      | null                                                                                 | 942  | 0.687593997 | 0.35739785  | 1.3189     | Yes    |     |
| 43 | NSF       | N-ethylmaleimide-sensitive factor                                                    | 960  | 0.683116436 | 0.36169985  | 1.3165     | Yes    |     |
| 44 | null      | null                                                                                 | 1017 | 0.664276063 | 0.3629645   | 1.4320     | Yes    |     |
| 45 | PPP1R11   | protein phosphatase 1, regulatory (inhibitor) subunit 11                             | 1026 | 0.661581457 | 0.36775678  | 1.3050     | Yes    |     |
| 46 | TRIM46    | tripartite motif-containing 46                                                       | 1081 | 0.642917037 | 0.36899555  | 1.3281     | Yes    |     |
| 47 | DPP7      | dipeptidyl-peptidase 7                                                               | 1087 | 0.641623437 | 0.37384725  | 1.2944     | Yes    |     |
| 48 | null      | null                                                                                 | 1102 | 0.637546897 | 0.37800023  | 1.2923     | Yes    |     |
| 49 | ITGA6     | integrin, alpha 6                                                                    | 1105 | 0.636205733 | 0.38302967  | 1.2916     | Yes    |     |
| 50 | CARD10    | caspace recruitment domain family, member 10                                         | 1129 | 0.627179861 | 0.38643277  | 1.6535     | Yes    |     |
| 51 | DAB2IP    | DAB2 interacting protein                                                             | 1150 | 0.623401344 | 0.39002693  | 1.2849     | Yes    |     |
| 52 | null      | null                                                                                 | 1153 | 0.622028589 | 0.394941    | 1.2842     | Yes    |     |
| 53 | APLN      | apelin, AGTRL1 ligand                                                                | 1193 | 0.611466706 | 0.39703307  | 1.2787     | Yes    |     |
| 54 | GGNBP1    |                                                                                      | 0    | 1246        | 0.597697556 | 0.3980517  | 1.2715 | Yes |
| 55 | THBD      | thrombomodulin                                                                       | 1288 | 0.587005079 | 0.3997968   | 1.2800     | Yes    |     |
| 56 | APOC2     | apolipoprotein C-II                                                                  | 1294 | 0.58550489  | 0.40419182  | 1.5014     | Yes    |     |
| 57 | PTPN13    | protein tyrosine phosphatase, non-receptor type 13 (APO-1/CD95 (Fas)-associated pho: | 1296 | 0.585243404 | 0.40888047  | 1.2651     | Yes    |     |
| 58 | VLDLR     | very low density lipoprotein receptor                                                | 1327 | 0.579953611 | 0.4113816   | 1.3200     | Yes    |     |
| 59 | MAPBPIP   |                                                                                      | 0    | 1396        | 0.566428244 | 0.41096264 | 1.2555 | Yes |
| 60 | BMPR2     | bone morphogenetic protein receptor, type II (serine/threonine kinase)               | 1446 | 0.555933893 | 0.4118633   | 1.2502     | Yes    |     |
| 61 | TNFAIP2   | tumor necrosis factor, alpha-induced protein 2                                       | 1497 | 0.546458662 | 0.4126129   | 1.2454     | Yes    |     |
| 62 | FGR       | Gardner-Rasheed feline sarcoma viral (v-fgr) oncogene homolog                        | 1504 | 0.545695186 | 0.41660997  | 1.5392     | Yes    |     |
| 63 | BCL3      | B-cell CLL/lymphoma 3                                                                | 1505 | 0.545554936 | 0.42104962  | 1.2449     | Yes    |     |
| 64 | HIST1H2BC | histone cluster 1, H2bc                                                              | 1565 | 0.531322539 | 0.4210105   | 1.3739     | Yes    |     |
| 65 | JUB       | jub, ajuba homolog ( <i>Xenopus laevis</i> )                                         | 1611 | 0.525250852 | 0.42195722  | 1.2585     | Yes    |     |
| 66 | NDST1     | N-deacetylase/N-sulfotransferase (heparan glucosaminyl) 1                            | 1665 | 0.515918136 | 0.42223644  | 1.2872     | Yes    |     |
| 67 | GCLM      | glutamate-cysteine ligase, modifier subunit                                          | 1675 | 0.514390528 | 0.42575696  | 1.2294     | Yes    |     |
| 68 | SLC6A8    | solute carrier family 6 (neurotransmitter transporter, creatine), member 8           | 1712 | 0.508136213 | 0.42722994  | 1.8565     | Yes    |     |

|     |         |                                                                                 |      |             |            |        |     |
|-----|---------|---------------------------------------------------------------------------------|------|-------------|------------|--------|-----|
| 69  | BTBD14A | BTB (POZ) domain containing 14A                                                 | 1745 | 0.502474845 | 0.42895266 | 1.2234 | Yes |
| 70  | HCST    | hematopoietic cell signal transducer                                            | 1746 | 0.502348304 | 0.4330407  | 1.2234 | Yes |
| 71  | USP47   | ubiquitin specific peptidase 47                                                 | 1777 | 0.496815383 | 0.43486527 | 1.2207 | Yes |
| 72  | CNTN1   | contactin 1                                                                     | 1816 | 0.489034176 | 0.43603492 | 1.2168 | Yes |
| 73  | SLC10A1 | solute carrier family 10 (sodium/bile acid cotransporter family), member 1      | 1926 | 0.474009305 | 0.431832   | 1.5045 | Yes |
| 74  | SPON1   | spondin 1, extracellular matrix protein                                         | 1949 | 0.470394284 | 0.43403313 | 1.5014 | Yes |
| 75  | TRIM2   | tripartite motif-containing 2                                                   | 2010 | 0.459951729 | 0.43333927 | 1.2026 | Yes |
| 76  | MTAC2D1 | membrane targeting (tandem) C2 domain containing 1                              | 2062 | 0.453144938 | 0.43325552 | 1.1993 | Yes |
| 77  | CPD     | carboxypeptidase D                                                              | 2177 | 0.438946456 | 0.42839754 | 1.2032 | Yes |
| 78  | B3GALT1 | UDP-Gal:betaGlcNAc beta 1,3-galactosyltransferase, polypeptide 1                | 2178 | 0.438940108 | 0.43196955 | 1.2924 | Yes |
| 79  | SCGB3A1 | secretoglobin, family 3A, member 1                                              | 2196 | 0.43523851  | 0.43425435 | 1.4426 | Yes |
| 80  | WWP2    | WW domain containing E3 ubiquitin protein ligase 2                              | 2271 | 0.42488122  | 0.4322398  | 1.1857 | Yes |
| 81  | ABCA4   | ATP-binding cassette, sub-family A (ABC1), member 4                             | 2320 | 0.41821602  | 0.43209365 | 1.4926 | Yes |
| 82  | STAU2   | staufen, RNA binding protein, homolog 2 (Drosophila)                            | 2342 | 0.415595383 | 0.4339228  | 1.2487 | Yes |
| 83  | CLTB    | clathrin, light chain (Lcb)                                                     | 2389 | 0.410020053 | 0.43385786 | 1.1787 | Yes |
| 84  | IER2    | immediate early response 2                                                      | 2405 | 0.408056051 | 0.43606934 | 1.3203 | Yes |
| 85  | null    | null                                                                            | 2512 | 0.397652566 | 0.43146688 | 1.4447 | No  |
| 86  | TIMP3   | TIMP metallopeptidase inhibitor 3 (Sorsby fundus dystrophy, pseudoinflammatory) | 2532 | 0.395071536 | 0.4332769  | 1.3277 | No  |
| 87  | NEUROG3 | neurogenin 3                                                                    | 2636 | 0.381450236 | 0.42876443 | 1.1652 | No  |
| 88  | null    | null                                                                            | 2673 | 0.375980228 | 0.42916197 | 1.1626 | No  |
| 89  | null    | null                                                                            | 2686 | 0.373805553 | 0.43131655 | 1.1930 | No  |
| 90  | SESN2   | sestrin 2                                                                       | 2718 | 0.369672895 | 0.4320325  | 1.1597 | No  |
| 91  | null    | null                                                                            | 2811 | 0.359689146 | 0.42815638 | 1.3727 | No  |
| 92  | ABCC1   | ATP-binding cassette, sub-family C (CFTR/MRP), member 1                         | 2867 | 0.354968935 | 0.4269779  | 1.1528 | No  |
| 93  | PTK9    | PTK9 protein tyrosine kinase 9                                                  | 2875 | 0.354524255 | 0.42934534 | 1.1526 | No  |
| 94  | STAMBP  | STAM binding protein                                                            | 2987 | 0.342242003 | 0.4239222  | 1.1470 | No  |
| 95  | STX17   | syntaxin 17                                                                     | 3012 | 0.339539439 | 0.42491058 | 1.1457 | No  |
| 96  | null    | null                                                                            | 3175 | 0.322799295 | 0.41555786 | 1.1380 | No  |
| 97  | MYO1E   | myosin IE                                                                       | 3261 | 0.314641982 | 0.41183278 | 1.1343 | No  |
| 98  | null    | null                                                                            | 3279 | 0.313248217 | 0.41312483 | 1.1419 | No  |
| 99  | KDR     | kinase insert domain receptor (a type III receptor tyrosine kinase)             | 3369 | 0.305295438 | 0.4090279  | 1.1301 | No  |
| 100 | SOCS3   | suppressor of cytokine signaling 3                                              | 3388 | 0.30374372  | 0.41016865 | 1.2632 | No  |
| 101 | PBX1    | pre-B-cell leukemia transcription factor 1                                      | 3497 | 0.293286353 | 0.40456897 | 1.2158 | No  |
| 102 | RAP2B   | RAP2B, member of RAS oncogene family                                            | 3517 | 0.291652322 | 0.4055374  | 1.1239 | No  |
| 103 | OVGP1   | oviductal glycoprotein 1, 120kDa (mucin 9, oviductin)                           | 3582 | 0.285707474 | 0.40312976 | 1.1890 | No  |
| 104 | ETNK1   | ethanolamine kinase 1                                                           | 3603 | 0.282780916 | 0.40395203 | 1.1199 | No  |
| 105 | STAM2   | signal transducing adaptor molecule (SH3 domain and ITAM motif) 2               | 3653 | 0.27803728  | 0.4025912  | 1.1479 | No  |
| 106 | CRK     | v-crk sarcoma virus CT10 oncogene homolog (avian)                               | 3696 | 0.273806006 | 0.40171355 | 1.1254 | No  |
| 107 | ENPP4   | ectonucleotide pyrophosphatase/phosphodiesterase 4 (putative function)          | 3703 | 0.273222059 | 0.40349331 | 1.1156 | No  |
| 108 | ARHGAP6 | Rho GTPase activating protein 6                                                 | 3727 | 0.270726532 | 0.40399563 | 1.1145 | No  |
| 109 | CEBPD   | CCAAT/enhancer binding protein (C/EBP), delta                                   | 3749 | 0.268893004 | 0.40463093 | 1.1137 | No  |
| 110 | ERG     | v-ets erythroblastosis virus E26 oncogene homolog (avian)                       | 3847 | 0.260774732 | 0.39958012 | 1.1289 | No  |
| 111 | SNRP70  | small nuclear ribonucleoprotein 70kDa polypeptide (RNP antigen)                 | 3914 | 0.255302936 | 0.39677715 | 1.1076 | No  |

|     |          |                                                                                      |      |             |            |        |    |
|-----|----------|--------------------------------------------------------------------------------------|------|-------------|------------|--------|----|
| 112 | CEBPB    | CCAAT/enhancer binding protein (C/EBP), beta                                         | 3989 | 0.249320552 | 0.3933339  | 1.1050 | No |
| 113 | PLSCR2   | phospholipid scramblase 2                                                            | 3997 | 0.248605177 | 0.3948394  | 1.1757 | No |
| 114 | FYB      | FYN binding protein (FYB-120/130)                                                    | 4053 | 0.243842691 | 0.3927566  | 1.1025 | No |
| 115 | WAC      | WW domain containing adaptor with coiled-coil                                        | 4078 | 0.242323101 | 0.39295384 | 1.1019 | No |
| 116 | null     | null                                                                                 | 4089 | 0.241500258 | 0.39417964 | 1.1015 | No |
| 117 | SCLY     | selenocysteine lyase                                                                 | 4108 | 0.240031481 | 0.3948019  | 1.1363 | No |
| 118 | GPD2     | glycerol-3-phosphate dehydrogenase 2 (mitochondrial)                                 | 4187 | 0.234281182 | 0.39094052 | 1.0983 | No |
| 119 | GRASP    | GRP1 (general receptor for phosphoinositides 1)-associated scaffold protein          | 4235 | 0.231081858 | 0.38934547 | 1.0969 | No |
| 120 | HIP1     | huntingtin interacting protein 1                                                     | 4564 | 0.205812782 | 0.36676535 | 1.0859 | No |
| 121 | null     | null                                                                                 | 4658 | 0.198741287 | 0.3615055  | 1.0828 | No |
| 122 | ARHGEF12 | Rho guanine nucleotide exchange factor (GEF) 12                                      | 4744 | 0.192566112 | 0.356787   | 1.0846 | No |
| 123 | LPL      | lipoprotein lipase                                                                   | 4788 | 0.190440536 | 0.35515702 | 1.1405 | No |
| 124 | PTPN11   | protein tyrosine phosphatase, non-receptor type 11 (Noonan syndrome 1)               | 4937 | 0.178258643 | 0.34566334 | 1.0739 | No |
| 125 | GADD45G  | growth arrest and DNA-damage-inducible, gamma                                        | 4979 | 0.175652206 | 0.3440609  | 1.1129 | No |
| 126 | PHIP     | pleckstrin homology domain interacting protein                                       | 5363 | 0.150468916 | 0.31696326 | 1.0870 | No |
| 127 | ELF2     | E74-like factor 2 (ets domain transcription factor)                                  | 5387 | 0.149042994 | 0.31647533 | 1.0614 | No |
| 128 | RAB40B   | RAB40B, member RAS oncogene family                                                   | 5519 | 0.140625909 | 0.30793253 | 1.0638 | No |
| 129 | RORB     | RAR-related orphan receptor B                                                        | 5547 | 0.138684556 | 0.30706453 | 1.0571 | No |
| 130 | BTG2     | BTG family, member 2                                                                 | 5623 | 0.134214014 | 0.30261064 | 1.1499 | No |
| 131 | RUNX1    | runt-related transcription factor 1 (acute myeloid leukemia 1; aml1 oncogene)        | 5713 | 0.127663165 | 0.29706815 | 1.0597 | No |
| 132 | CYP7A1   | cytochrome P450, family 7, subfamily A, polypeptide 1                                | 5744 | 0.125845075 | 0.29587382 | 1.0516 | No |
| 133 | RRM2B    | ribonucleotide reductase M2 B (TP53 inducible)                                       | 5811 | 0.121337079 | 0.29198068 | 1.0497 | No |
| 134 | RNF128   | ring finger protein 128                                                              | 5924 | 0.113585584 | 0.28462282 | 1.0498 | No |
| 135 | AP3B1    | adaptor-related protein complex 3, beta 1 subunit                                    | 5985 | 0.109784447 | 0.28107935 | 1.0449 | No |
| 136 | RIPK4    | receptor-interacting serine-threonine kinase 4                                       | 6252 | 0.092476651 | 0.26216173 | 1.0389 | No |
| 137 | null     | null                                                                                 | 6265 | 0.091635674 | 0.26202005 | 1.0373 | No |
| 138 | TBX1     | T-box 1                                                                              | 6363 | 0.086158373 | 0.25554824 | 1.0351 | No |
| 139 | SCN11A   | sodium channel, voltage-gated, type XI, alpha                                        | 6368 | 0.085734367 | 0.25595012 | 1.0354 | No |
| 140 | JARID1A  | jumonji, AT rich interactive domain 1A                                               | 6376 | 0.085090771 | 0.25612494 | 1.0482 | No |
| 141 | TMEM23   | transmembrane protein 23                                                             | 6399 | 0.08369305  | 0.25517917 | 1.0340 | No |
| 142 | MAF      | v-maf musculoaponeurotic fibrosarcoma oncogene homolog (avian)                       | 6489 | 0.077497661 | 0.24922846 | 1.0315 | No |
| 143 | PTGFRN   | prostaglandin F2 receptor negative regulator                                         | 6570 | 0.072287954 | 0.24390088 | 1.0293 | No |
| 144 | null     | null                                                                                 | 6631 | 0.068182655 | 0.24001886 | 1.0297 | No |
| 145 | null     | null                                                                                 | 6656 | 0.067026392 | 0.23878956 | 1.0272 | No |
| 146 | ILF3     | interleukin enhancer binding factor 3, 90kDa                                         | 6673 | 0.065566793 | 0.23813996 | 1.0266 | No |
| 147 | USP8     | ubiquitin specific peptidase 8                                                       | 6986 | 0.044425398 | 0.21542968 | 1.0203 | No |
| 148 | null     | null                                                                                 | 7076 | 0.039232966 | 0.20916757 | 1.0182 | No |
| 149 | MRPS9    | mitochondrial ribosomal protein S9                                                   | 7113 | 0.036401536 | 0.20680167 | 1.0147 | No |
| 150 | PIAS1    | protein inhibitor of activated STAT, 1                                               | 7283 | 0.027306888 | 0.19452666 | 1.0110 | No |
| 151 | null     | null                                                                                 | 7326 | 0.025084321 | 0.19162497 | 1.0101 | No |
| 152 | ANXA7    | annexin A7                                                                           | 7366 | 0.022884345 | 0.18892723 | 1.0092 | No |
| 153 | MEF2C    | MADS box transcription enhancer factor 2, polypeptide C (myocyte enhancer factor 2C) | 7386 | 0.021896942 | 0.1877004  | 1.0088 | No |
| 154 | SRPK2    | SFRS protein kinase 2                                                                | 7450 | 0.017906735 | 0.1831874  | 1.0072 | No |

|     |         |                                                                                   |      |              |             |        |    |
|-----|---------|-----------------------------------------------------------------------------------|------|--------------|-------------|--------|----|
| 155 | SOD1    | superoxide dismutase 1, soluble (amyotrophic lateral sclerosis 1 (adult))         | 7458 | 0.017553134  | 0.18281262  | 1.0070 | No |
| 156 | null    | null                                                                              | 7561 | 0.011557085  | 0.17536396  | 1.0046 | No |
| 157 | ADIPOR2 | adiponectin receptor 2                                                            | 7604 | 0.00892015   | 0.17233072  | 1.0036 | No |
| 158 | CTSB    | cathepsin B                                                                       | 7691 | 0.003888367  | 0.16600282  | 1.0016 | No |
| 159 | GRID1   | glutamate receptor, ionotropic, delta 1                                           | 7765 | 0.000251063  | 0.16060667  | 1.0001 | No |
| 160 | TRIM24  | tripartite motif-containing 24                                                    | 7779 | -0.000414963 | 0.15964872  | 0.9998 | No |
| 161 | STX1A   | syntaxin 1A (brain)                                                               | 7811 | -0.002517296 | 0.15737681  | 0.9980 | No |
| 162 | ARID5A  | AT rich interactive domain 5A (MRF1-like)                                         | 7815 | -0.002808701 | 0.15717782  | 0.9988 | No |
| 163 | null    | null                                                                              | 7849 | -0.005077825 | 0.15477885  | 0.9978 | No |
| 164 | NTF3    | neurotrophin 3                                                                    | 7896 | -0.008338188 | 0.1514451   | 0.9967 | No |
| 165 | FA2H    | fatty acid 2-hydroxylase                                                          | 7902 | -0.008495384 | 0.15114449  | 0.9966 | No |
| 166 | NPEPPS  | aminopeptidase puromycin sensitive                                                | 8140 | -0.022807153 | 0.1338044   | 0.9909 | No |
| 167 | null    | null                                                                              | 8177 | -0.025425982 | 0.13134918  | 0.9869 | No |
| 168 | ADAM19  | ADAM metallopeptidase domain 19 (meltrin beta)                                    | 8274 | -0.031840995 | 0.12450928  | 0.9861 | No |
| 169 | SEC63   | SEC63 homolog (S. cerevisiae)                                                     | 8275 | -0.031936128 | 0.12476917  | 0.9873 | No |
| 170 | ZPBP    | zona pellucida binding protein                                                    | 8514 | -0.049602516 | 0.10757318  | 0.9706 | No |
| 171 | SEMA4F  | sema domain, immunoglobulin domain (Ig), transmembrane domain (TM) and short cyto | 8599 | -0.055091139 | 0.10180987  | 0.9746 | No |
| 172 | TMOD3   | tropomodulin 3 (ubiquitous)                                                       | 8603 | -0.055375159 | 0.10203866  | 0.9704 | No |
| 173 | LGR6    | leucine-rich repeat-containing G protein-coupled receptor 6                       | 8637 | -0.05748998  | 0.100066215 | 0.9773 | No |
| 174 | RCOR3   | REST corepressor 3                                                                | 8680 | -0.060499355 | 0.09745273  | 0.9712 | No |
| 175 | FMN2    | formin 2                                                                          | 8765 | -0.066288851 | 0.091780536 | 0.9724 | No |
| 176 | EDG1    | endothelial differentiation, sphingolipid G-protein-coupled receptor, 1           | 8786 | -0.068000555 | 0.09085496  | 0.9732 | No |
| 177 | NMT2    | N-myristoyltransferase 2                                                          | 8845 | -0.072000317 | 0.08715189  | 0.9685 | No |
| 178 | PDE8A   | phosphodiesterase 8A                                                              | 8935 | -0.077857301 | 0.0812041   | 0.9693 | No |
| 179 | TRIM44  | tripartite motif-containing 44                                                    | 8951 | -0.078641027 | 0.08073485  | 0.9690 | No |
| 180 | null    | null                                                                              | 9085 | -0.088216499 | 0.07161765  | 0.9589 | No |
| 181 | PSMD11  | proteasome (prosome, macropain) 26S subunit, non-ATPase, 11                       | 9116 | -0.090162039 | 0.070132926 | 0.9565 | No |
| 182 | MTCH2   | mitochondrial carrier homolog 2 (C. elegans)                                      | 9144 | -0.092472732 | 0.06888886  | 0.9590 | No |
| 183 | PCDHB16 | protocadherin beta 16                                                             | 9191 | -0.09507481  | 0.06626095  | 0.9627 | No |
| 184 | RNF32   | ring finger protein 32                                                            | 9265 | -0.100651979 | 0.06168183  | 0.9580 | No |
| 185 | NRG4    | neuregulin 4                                                                      | 9273 | -0.101098336 | 0.061986916 | 0.9348 | No |
| 186 | ITGB4BP | integrin beta 4 binding protein                                                   | 9306 | -0.103554502 | 0.060463287 | 0.9594 | No |
| 187 | null    | null                                                                              | 9360 | -0.106301978 | 0.057409108 | 0.9584 | No |
| 188 | NCKIPSD | NCK interacting protein with SH3 domain                                           | 9389 | -0.108426176 | 0.056220915 | 0.9456 | No |
| 189 | CLCN3   | chloride channel 3                                                                | 9401 | -0.109309651 | 0.05629703  | 0.9572 | No |
| 190 | B2M     | beta-2-microglobulin                                                              | 9569 | -0.122995548 | 0.04494862  | 0.9520 | No |
| 191 | PML     | promyelocytic leukemia                                                            | 9628 | -0.127696708 | 0.041698806 | 0.9501 | No |
| 192 | RAPGEF3 | Rap guanine nucleotide exchange factor (GEF) 3                                    | 9647 | -0.128808796 | 0.041415967 | 0.9498 | No |
| 193 | NAB1    | NGFI-A binding protein 1 (EGR1 binding protein 1)                                 | 9655 | -0.129191726 | 0.04194967  | 0.9496 | No |
| 194 | AH11    | Abelson helper integration site 1                                                 | 9681 | -0.130587399 | 0.041163668 | 0.9491 | No |
| 195 | NDRG1   | N-myc downstream regulated gene 1                                                 | 9728 | -0.133917853 | 0.038851857 | 0.9478 | No |
| 196 | DGKQ    | diacylglycerol kinase, theta 110kDa                                               | 9866 | -0.145375997 | 0.029904017 | 0.9435 | No |
| 197 | HSPB1   | heat shock 27kDa protein 1                                                        | 9966 | -0.153833285 | 0.023835028 | 0.9072 | No |

|     |          |                                                                                         |       |              |              |        |    |
|-----|----------|-----------------------------------------------------------------------------------------|-------|--------------|--------------|--------|----|
| 198 | TRPM6    | transient receptor potential cation channel, subfamily M, member 6                      | 9981  | -0.155119076 | 0.02406209   | 0.9398 | No |
| 199 | PLEKHC1  | pleckstrin homology domain containing, family C (with FERM domain) member 1             | 9999  | -0.156457141 | 0.024078194  | 0.9393 | No |
| 200 | ALCAM    | activated leukocyte cell adhesion molecule                                              | 10054 | -0.16170156  | 0.0214009    | 0.9070 | No |
| 201 | GCNT2    | glucosaminyl (N-acetyl) transferase 2, I-branching enzyme (I blood group)               | 10087 | -0.1640165   | 0.0203693    | 0.9365 | No |
| 202 | OXR1     | oxidation resistance 1                                                                  | 10182 | -0.172742248 | 0.01482393   | 0.9332 | No |
| 203 | ENTPD2   | ectonucleoside triphosphate diphosphohydrolase 2                                        | 10209 | -0.175095558 | 0.01432618   | 0.9232 | No |
| 204 | WASL     | Wiskott-Aldrich syndrome-like                                                           | 10311 | -0.18493636  | 0.008362406  | 0.9287 | No |
| 205 | EMP2     | epithelial membrane protein 2                                                           | 10317 | -0.185469732 | 0.009501989  | 0.9285 | No |
| 206 | RSN      | restin (Reed-Steinberg cell-expressed intermediate filament-associated protein)         | 10324 | -0.185767829 | 0.01057005   | 0.9284 | No |
| 207 | EHD3     | EH-domain containing 3                                                                  | 10356 | -0.189090133 | 0.009816445  | 0.9136 | No |
| 208 | SLC26A8  | solute carrier family 26, member 8                                                      | 10375 | -0.190917209 | 0.010039033  | 0.9264 | No |
| 209 | KIFAP3   | kinesin-associated protein 3                                                            | 10417 | -0.194856063 | 0.00859287   | 0.9250 | No |
| 210 | HSPA1A   | heat shock 70kDa protein 1A                                                             | 10512 | -0.202952042 | 0.003293341  | 0.7508 | No |
| 211 | HSPA1B   | heat shock 70kDa protein 1B                                                             | 10670 | -0.217669427 | -0.006545149 | 0.5569 | No |
| 212 | ARIH2    | ariadne homolog 2 (Drosophila)                                                          | 10776 | -0.228187606 | -0.012452744 | 0.9127 | No |
| 213 | FGFR3    | fibroblast growth factor receptor 3 (achondroplasia, thanatophoric dwarfism)            | 10837 | -0.233682245 | -0.01498796  | 0.9107 | No |
| 214 | FGFR1OP2 | FGFR1 oncogene partner 2                                                                | 10845 | -0.234496892 | -0.013597298 | 0.9104 | No |
| 215 | null     | null                                                                                    | 10850 | -0.234621182 | -0.01198378  | 0.9104 | No |
| 216 | SRRM1    | serine/arginine repetitive matrix 1                                                     | 10899 | -0.239223346 | -0.013586526 | 0.9087 | No |
| 217 | null     | null                                                                                    | 10945 | -0.243598327 | -0.014931825 | 0.9071 | No |
| 218 | IKBKB    | inhibitor of kappa light polypeptide gene enhancer in B-cells, kinase beta              | 11006 | -0.249466166 | -0.017338594 | 0.9050 | No |
| 219 | SMARCA2  | SWI/SNF related, matrix associated, actin dependent regulator of chromatin, subfamily a | 11085 | -0.258220106 | -0.02100519  | 0.9018 | No |
| 220 | MARVELD1 | MARVEL domain containing 1                                                              | 11094 | -0.258974433 | -0.019489283 | 0.9015 | No |
| 221 | SOAT1    | sterol O-acyltransferase (acyl-Coenzyme A: cholesterol acyltransferase) 1               | 11255 | -0.274825513 | -0.029084489 | 0.8958 | No |
| 222 | CCRN4L   | CCR4 carbon catabolite repression 4-like (S. cerevisiae)                                | 11284 | -0.278987259 | -0.028884681 | 0.8830 | No |
| 223 | FOXP2    | forkhead box P2                                                                         | 11507 | -0.303153843 | -0.04283414  | 0.8857 | No |
| 224 | DNM3     | dynamin 3                                                                               | 11538 | -0.308654159 | -0.042540804 | 0.8837 | No |
| 225 | PIP5K1A  | phosphatidylinositol-4-phosphate 5-kinase, type I, alpha                                | 11567 | -0.313775271 | -0.042057894 | 0.8819 | No |
| 226 | DNAJC3   | DnaJ (Hsp40) homolog, subfamily C, member 3                                             | 11673 | -0.325536549 | -0.04717328  | 0.8751 | No |
| 227 | LRBA     | LPS-responsive vesicle trafficking, beach and anchor containing                         | 11743 | -0.335929245 | -0.049541958 | 0.8741 | No |
| 228 | STARD6   | START domain containing 6                                                               | 11824 | -0.347052068 | -0.05263355  | 0.8679 | No |
| 229 | FMR1NB   | fragile X mental retardation 1 neighbor                                                 | 11833 | -0.348307878 | -0.05039066  | 0.8698 | No |
| 230 | null     | null                                                                                    | 11852 | -0.351404518 | -0.04886205  | 0.7642 | No |
| 231 | MMP14    | matrix metalloproteinase 14 (membrane-inserted)                                         | 11971 | -0.371638238 | -0.054563593 | 0.7329 | No |
| 232 | null     | null                                                                                    | 12074 | -0.390717208 | -0.0589267   | 0.8550 | No |
| 233 | PRPF39   | PRP39 pre-mRNA processing factor 39 homolog (S. cerevisiae)                             | 12207 | -0.413529724 | -0.06532261  | 0.8472 | No |
| 234 | TRIM34   | tripartite motif-containing 34                                                          | 12218 | -0.414827436 | -0.062686294 | 0.8468 | No |
| 235 | KPNA4    | karyopherin alpha 4 (importin alpha 3)                                                  | 12306 | -0.429637909 | -0.06562345  | 0.8417 | No |
| 236 | FLI1     | Friend leukemia virus integration 1                                                     | 12409 | -0.448735625 | -0.069514416 | 0.8112 | No |
| 237 | ANKRD6   | ankyrin repeat domain 6                                                                 | 12425 | -0.452831984 | -0.06693856  | 0.8339 | No |
| 238 | ATP10A   | ATPase, Class V, type 10A                                                               | 12444 | -0.456956714 | -0.06455098  | 0.8325 | No |
| 239 | CPEB3    | cytoplasmic polyadenylation element binding protein 3                                   | 12456 | -0.459990591 | -0.06162108  | 0.8068 | No |
| 240 | SORBS1   | sorbin and SH3 domain containing 1                                                      | 12458 | -0.460699707 | -0.05794593  | 0.8313 | No |

|     |          |                                                                                         |       |              |              |             |        |    |
|-----|----------|-----------------------------------------------------------------------------------------|-------|--------------|--------------|-------------|--------|----|
| 241 | ABAT     | 4-aminobutyrate aminotransferase                                                        | 12495 | -0.469377518 | -0.05678834  | 0.7700      | No     |    |
| 242 | RPS6KA3  | ribosomal protein S6 kinase, 90kDa, polypeptide 3                                       | 12625 | -0.502301455 | -0.062239993 | 0.7889      | No     |    |
| 243 | DAPP1    | dual adaptor of phosphotyrosine and 3-phosphoinositides                                 | 12649 | -0.508023322 | -0.059806585 | 0.8155      | No     |    |
| 244 | PSCDBP   | pleckstrin homology, Sec7 and coiled-coil domains, binding protein                      | 12672 | -0.512065888 | -0.057266332 | 0.8077      | No     |    |
| 245 | null     | null                                                                                    | 12714 | -0.522526085 | -0.056045968 | 0.8108      | No     |    |
| 246 | IL1RAPL2 | interleukin 1 receptor accessory protein-like 2                                         | 12736 | -0.526428759 | -0.053314883 | 0.7601      | No     |    |
| 247 | AMPD3    | adenosine monophosphate deaminase (isoform E)                                           | 12747 | -0.530482352 | -0.049737383 | 0.7828      | No     |    |
| 248 | MOCOS    | molybdenum cofactor sulfurase                                                           | 12778 | -0.537811339 | -0.0475792   | 0.8058      | No     |    |
| 249 | CYR61    | cysteine-rich, angiogenic inducer, 61                                                   | 12844 | -0.555603743 | -0.04786441  | 0.8000      | No     |    |
| 250 | null     | null                                                                                    | 12922 | -0.582569659 | -0.048817553 | 0.7913      | No     |    |
| 251 | KLHL5    | kelch-like 5 (Drosophila)                                                               | 13015 | -0.61558032  | -0.05061128  | 0.7521      | No     |    |
| 252 | SPINT1   | serine peptidase inhibitor, Kunitz type 1                                               | 13016 | -0.616101146 | -0.045597546 | 0.7298      | No     |    |
| 253 | MPP7     | membrane protein, palmitoylated 7 (MAGUK p55 subfamily member 7)                        | 13094 | -0.648020625 | -0.04601806  | 0.7705      | No     |    |
| 254 | null     | null                                                                                    | 13150 | -0.669043899 | -0.04464063  | 0.6780      | No     |    |
| 255 | HIF1A    | hypoxia-inducible factor 1, alpha subunit (basic helix-loop-helix transcription factor) | 13156 | -0.671386898 | -0.03954673  | 0.7528      | No     |    |
| 256 | GATM     | glycine amidinotransferase (L-arginine:glycine amidinotransferase)                      | 13158 | -0.672011852 | -0.034151953 | 0.7317      | No     |    |
| 257 | null     | null                                                                                    | 13297 | -0.750778854 | -0.038247067 | 0.7184      | No     |    |
| 258 | BIRC6    | baculoviral IAP repeat-containing 6 (apollon)                                           | 13330 | -0.773114145 | -0.034321927 | 0.7038      | No     |    |
| 259 | ASB13    | ankyrin repeat and SOCS box-containing 13                                               | 13345 | -0.781578302 | -0.028996838 | 0.6378      | No     |    |
| 260 | FGFR1    | fibroblast growth factor receptor 1 (fms-related tyrosine kinase 2, Pfeiffer syndrome)  | 13368 | -0.795764864 | -0.024147887 | 0.6953      | No     |    |
| 261 | RGNEF    |                                                                                         | 0     | 13444        | -0.862851918 | -0.02267224 | 0.5975 | No |
| 262 | PTGER3   | prostaglandin E receptor 3 (subtype EP3)                                                | 13547 | -0.977246821 | -0.022262264 | 0.6625      | No     |    |
| 263 | CLDN5    | claudin 5 (transmembrane protein deleted in velocardiofacial syndrome)                  | 13603 | -1.054393292 | -0.017748924 | 0.5565      | No     |    |
| 264 | HIST1H1C | histone cluster 1, H1c                                                                  | 13669 | -1.229796648 | -0.012547657 | 0.4956      | No     |    |
| 265 | CPEB2    | cytoplasmic polyadenylation element binding protein 2                                   | 13670 | -1.230865836 | -0.002531065 | 0.5444      | No     |    |
| 266 | IL10RA   | interleukin 10 receptor, alpha                                                          | 13706 | -1.383275628 | 0.006137631  | 0.4076      | No     |    |

TABLE S4 Chambers DOWN WITH AGE HSC SPECIFIC

|                                   |                               |
|-----------------------------------|-------------------------------|
| Phenotype                         | HSC.cls#Control_versus_OT11KO |
| Upregulated in class              | OTT1KO                        |
| GeneSet                           | DOWNWITHAGE_HSC_OVERLAP       |
| Enrichment Score (ES)             | -0.2333142                    |
| Normalized Enrichment Score (NES) | -1.0445206                    |
| Nominal p-value                   | 0.34411085                    |
| FDR q-value                       | 0.336668                      |
| FWER p-Value                      | 0.1826                        |

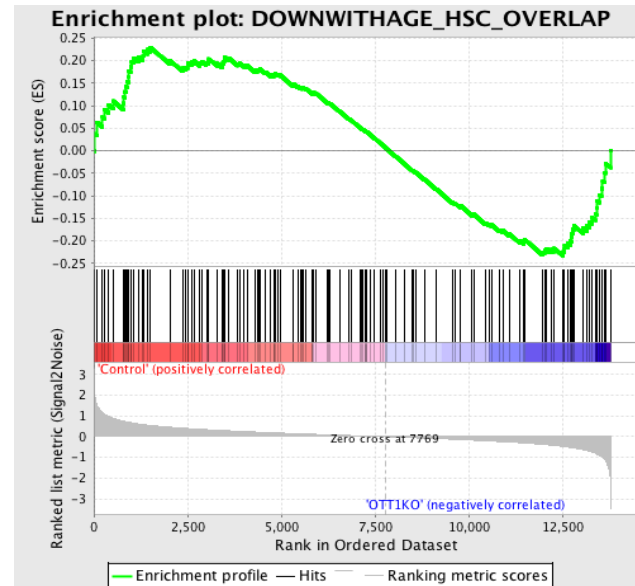

| ROW | GENE SYMB | GENE_TITLE                                              |
|-----|-----------|---------------------------------------------------------|
| 0   | GFER      | growth factor, augmenter of liver regeneration          |
| 1   | RBP1      | retinol binding protein 1, cellular                     |
| 2   | LZTS2     | leucine zipper, putative tumor suppressor 2             |
| 3   | CTBP2     | C-terminal binding protein 2                            |
| 4   | NINJ1     | ninjurin 1                                              |
| 5   | FSTL1     | follistatin-like 1                                      |
| 6   | CUL7      | cullin 7                                                |
| 7   | LASS4     | LAG1 homolog, ceramide synthase 4 (S. cerevisiae)       |
| 8   | CSNK2A2   | casein kinase 2, alpha prime polypeptide                |
| 9   | null      | null                                                    |
| 10  | NFIX      | nuclear factor I/X (CCAAT-binding transcription factor) |
| 11  | MRPS7     | mitochondrial ribosomal protein S7                      |
| 12  | PHF23     | PHD finger protein 23                                   |
| 13  | SOCS2     | suppressor of cytokine signaling 2                      |
| 14  | TSPAN4    | tetraspanin 4                                           |
| 15  | ENG       | endoglin (Osler-Rendu-Weber syndrome 1)                 |
| 16  | COG1      | component of oligomeric golgi complex 1                 |

| RANK      | RANK         | FOLD       | CORE          |
|-----------|--------------|------------|---------------|
| GENE LIST | METRIC SCORE | RUNNING ES | CHANGE ENRICH |
| 21        | 2.053913355  | 0.03795336 | 2.4697 Yes    |
| 81        | 1.523082018  | 0.06291762 | 1.8761 Yes    |
| 227       | 1.156800151  | 0.07454168 | 1.6020 Yes    |
| 278       | 1.09431839   | 0.09192104 | 1.5604 Yes    |
| 391       | 0.984606445  | 0.10265081 | 1.4904 Yes    |
| 516       | 0.886323631  | 0.11061213 | 1.5120 Yes    |
| 783       | 0.751604795  | 0.10558482 | 1.3538 Yes    |
| 800       | 0.745243073  | 0.11874217 | 1.4325 Yes    |
| 822       | 0.734152317  | 0.13132012 | 1.3442 Yes    |
| 859       | 0.714563012  | 0.14242302 | 1.3696 Yes    |
| 894       | 0.701698124  | 0.15342501 | 1.5286 Yes    |
| 921       | 0.693055034  | 0.16484663 | 1.3218 Yes    |
| 931       | 0.690587103  | 0.17746569 | 1.3205 Yes    |
| 980       | 0.675803304  | 0.1869446  | 1.8104 Yes    |
| 1004      | 0.668517411  | 0.19811413 | 1.3087 Yes    |
| 1066      | 0.650901318  | 0.20616227 | 1.2993 Yes    |
| 1195      | 0.611014664  | 0.20853725 | 1.2784 Yes    |



|    |         |                                                              |      |             |            |        |     |
|----|---------|--------------------------------------------------------------|------|-------------|------------|--------|-----|
| 17 | GLIS2   | GLIS family zinc finger 2                                    | 1311 | 0.582726836 | 0.21132028 | 1.3165 | Yes |
| 18 | ANKRD24 | ankyrin repeat domain 24                                     | 1323 | 0.580758333 | 0.22168118 | 1.2628 | Yes |
| 19 | HOXA5   | homeobox A5                                                  | 1427 | 0.559601128 | 0.22489831 | 1.2905 | Yes |
| 20 | RHBDP1  | rhomboid 5 homolog 1 (Drosophila)                            | 1507 | 0.545040727 | 0.22959295 | 1.4210 | Yes |
| 21 | null    | null                                                         | 2034 | 0.457536608 | 0.19987226 | 1.2014 | No  |
| 22 | GPS1    | G protein pathway suppressor 1                               | 2366 | 0.412994146 | 0.18357457 | 1.1801 | No  |
| 23 | NGFRAP1 | nerve growth factor receptor (TNFRSF16) associated protein 1 | 2443 | 0.40406251  | 0.18577828 | 1.1758 | No  |
| 24 | TAP1    | transporter 1, ATP-binding cassette, sub-family B (MDR/TAP)  | 2497 | 0.398913711 | 0.18956722 | 1.1734 | No  |
| 25 | CLPP    | ClpP caseinolytic peptidase, ATP-dependent,                  | 2515 | 0.397376508 | 0.19596282 | 1.1727 | No  |
| 26 | null    | null                                                         | 2606 | 0.385700315 | 0.19678827 | 1.2661 | No  |
| 27 | null    | null                                                         | 2669 | 0.376485646 | 0.19948693 | 1.1629 | No  |
| 28 | MTHFR   | 5,10-methylenetetrahydrofolate reductase (NADPH)             | 2830 | 0.357924521 | 0.19465238 | 1.2455 | No  |
| 29 | PTOV1   | prostate tumor overexpressed gene 1                          | 2876 | 0.354517967 | 0.19817354 | 1.1526 | No  |
| 30 | ZDHC9   | zinc finger, DHC-type containing 9                           | 3001 | 0.340472311 | 0.19563963 | 1.1461 | No  |
| 31 | null    | null                                                         | 3058 | 0.33407259  | 0.19796216 | 1.2435 | No  |
| 32 | TCEB2   | transcription elongation factor B (SIII), polypeptide 2      | 3064 | 0.333681315 | 0.20401181 | 1.1430 | No  |
| 33 | null    | null                                                         | 3285 | 0.312632471 | 0.19391274 | 1.1334 | No  |
| 34 | WDR45   | WD repeat domain 45                                          | 3425 | 0.300166517 | 0.18950544 | 1.1329 | No  |
| 35 | NTAN1   | N-terminal asparagine amidase                                | 3437 | 0.298856318 | 0.19444613 | 1.1271 | No  |
| 36 | GBA2    | glucosidase, beta (bile acid) 2                              | 3462 | 0.296016097 | 0.19838025 | 1.1259 | No  |
| 37 | null    | null                                                         | 3477 | 0.294604063 | 0.20301948 | 1.1598 | No  |
| 38 | GTF2F1  | general transcription factor IIF, polypeptide 1, 74kDa       | 3491 | 0.293595344 | 0.20771256 | 1.1248 | No  |
| 39 | IRF3    | interferon regulatory factor 3                               | 3588 | 0.28510201  | 0.20616442 | 1.1209 | No  |
| 40 | null    | null                                                         | 3832 | 0.261664629 | 0.19340113 | 1.1104 | No  |
| 41 | ZSCAN21 | zinc finger and SCAN domain containing 21                    | 3888 | 0.257784843 | 0.1943301  | 1.1151 | No  |
| 42 | ARL6IP4 | ADP-ribosylation-like factor 6 interacting protein 4         | 4009 | 0.247298151 | 0.19029762 | 1.1041 | No  |
| 43 | LXN     | latexin                                                      | 4083 | 0.242115989 | 0.18960722 | 1.1079 | No  |
| 44 | NOLA3   | nucleolar protein family A, member 3                         | 4289 | 0.226543814 | 0.17895132 | 1.0949 | No  |
| 45 | CSAD    | cysteine sulfinic acid decarboxylase                         | 4354 | 0.221394747 | 0.17852154 | 1.1636 | No  |
| 46 | PHKG2   | phosphorylase kinase, gamma 2 (testis)                       | 4393 | 0.219245404 | 0.17995438 | 1.0917 | No  |
| 47 | VDR     | vitamin D (1,25- dihydroxyvitamin D3) receptor               | 4421 | 0.217719406 | 0.18216337 | 1.1167 | No  |
| 48 | CCND2   | cyclin D2                                                    | 4583 | 0.20491372  | 0.17431362 | 1.0855 | No  |
| 49 | PFDN5   | prefoldin subunit 5                                          | 4720 | 0.194399402 | 0.1680924  | 1.0809 | No  |
| 50 | null    | null                                                         | 4793 | 0.189860016 | 0.16647047 | 1.0803 | No  |
| 51 | UBC     | ubiquitin C                                                  | 4808 | 0.188788474 | 0.16907518 | 1.0785 | No  |
| 52 | UTP11L  | UTP11-like, U3 small nucleolar ribonucleoprotein, (yeast)    | 4827 | 0.187100753 | 0.1713545  | 1.0777 | No  |
| 53 | WDR74   | WD repeat domain 74                                          | 4908 | 0.180946395 | 0.16897538 | 1.0751 | No  |
| 54 | null    | null                                                         | 4966 | 0.176533788 | 0.16819565 | 1.0732 | No  |
| 55 | RPS7    | ribosomal protein S7                                         | 5319 | 0.153299049 | 0.14536695 | 1.0633 | No  |

|    |          |                                                                 |      |              |              |        |    |
|----|----------|-----------------------------------------------------------------|------|--------------|--------------|--------|----|
| 56 | ATP5D    | ATP synthase, H+ transporting, mitochondrial F1 complex, delta  | 5320 | 0.153263777  | 0.1483138    | 1.0632 | No |
| 57 | null     | null                                                            | 5438 | 0.145521209  | 0.14254412   | 1.0600 | No |
| 58 | IRAK1    | interleukin-1 receptor-associated kinase 1                      | 5501 | 0.141429558  | 0.14072329   | 1.0582 | No |
| 59 | COL4A1   | collagen, type IV, alpha 1                                      | 5561 | 0.13804704   | 0.13905711   | 1.0999 | No |
| 60 | SOLH     | small optic lobes homolog (Drosophila)                          | 5588 | 0.136141926  | 0.13977082   | 1.0805 | No |
| 61 | RHEBL1   | Ras homolog enriched in brain like 1                            | 5653 | 0.131394342  | 0.1376106    | 1.0540 | No |
| 62 | ATAD3A   | ATPase family, AAA domain containing 3A                         | 5823 | 0.120581158  | 0.12755352   | 1.0494 | No |
| 63 | AKAP8L   | A kinase (PRKA) anchor protein 8-like                           | 5835 | 0.119672604  | 0.129049     | 1.0490 | No |
| 64 | TSHZ1    | teashirt family zinc finger 1                                   | 5843 | 0.119050518  | 0.13082542   | 1.0488 | No |
| 65 | WBP5     | WW domain binding protein 5                                     | 5922 | 0.113749951  | 0.12730074   | 1.0466 | No |
| 66 | RPL18    | ribosomal protein L18                                           | 6235 | 0.093476422  | 0.10625094   | 1.0381 | No |
| 67 | PTPN18   | protein tyrosine phosphatase, non-receptor type 18              | 6264 | 0.091642007  | 0.10596259   | 1.0373 | No |
| 68 | LAS1L    | LAS1-like (S. cerevisiae)                                       | 6307 | 0.089033827  | 0.104598895  | 1.0363 | No |
| 69 | FAU      | (FBR-MuSV) ubiquitously expressed ; ribosomal protein S30       | 6564 | 0.072586797  | 0.0872482    | 1.0295 | No |
| 70 | DPM2     | dolichyl-phosphate mannosyltransferase polypeptide 2, subunit   | 6813 | 0.05679306   | 0.070179656  | 1.0230 | No |
| 71 | ZRANB1   | zinc finger, RAN-binding domain containing 1                    | 6856 | 0.053776007  | 0.068138056  | 1.0217 | No |
| 72 | MBD1     | methyl-CpG binding domain protein 1                             | 7087 | 0.038208872  | 0.05203029   | 1.0186 | No |
| 73 | POLR2C   | polymerase (RNA) II (DNA directed) polypeptide C, 33kDa         | 7148 | 0.034159753  | 0.04829342   | 1.0138 | No |
| 74 | RABAC1   | Rab acceptor 1 (prenylated)                                     | 7182 | 0.032664787  | 0.046504952  | 1.0156 | No |
| 75 | MAP4K4   | mitogen-activated protein kinase kinase kinase kinase 4         | 7232 | 0.029455407  | 0.043483134  | 1.0119 | No |
| 76 | RRAD     | Ras-related associated with diabetes                            | 7243 | 0.028991461  | 0.04330828   | 1.0117 | No |
| 77 | SIRT3    | sirtuin (silent mating type information regulation 2 homolog) 3 | 7271 | 0.027919028  | 0.041867934  | 1.0112 | No |
| 78 | PRPSAP1  | phosphoribosyl pyrophosphate synthetase-associated protein 1    | 7282 | 0.027308259  | 0.04166072   | 1.0117 | No |
| 79 | null     | null                                                            | 7374 | 0.022457447  | 0.035428777  | 1.0095 | No |
| 80 | RPL37A   | ribosomal protein L37a                                          | 7490 | 0.015788039  | 0.02731113   | 1.0063 | No |
| 81 | PHC2     | polyhomeotic homolog 2 (Drosophila)                             | 7639 | 0.006900217  | 0.016606076  | 1.0028 | No |
| 82 | ZBTB20   | zinc finger and BTB domain containing 20                        | 7715 | 0.002776573  | 0.01116737   | 1.0011 | No |
| 83 | RPL14    | ribosomal protein L14                                           | 7767 | 2.65e-05     | 0.007433258  | 1.0000 | No |
| 84 | RPS14    | ribosomal protein S14                                           | 7803 | -0.001973265 | 0.004908222  | 0.9992 | No |
| 85 | CHKA     | choline kinase alpha                                            | 8057 | -0.017062087 | -0.013290376 | 0.9932 | No |
| 86 | RCC2     | regulator of chromosome condensation 2                          | 8267 | -0.031004099 | -0.02799888  | 0.9815 | No |
| 87 | AP1G2    | adaptor-related protein complex 1, gamma 2 subunit              | 8498 | -0.04845462  | -0.043909643 | 0.9779 | No |
| 88 | RPS15    | ribosomal protein S15                                           | 8507 | -0.048926219 | -0.04355475  | 0.9806 | No |
| 89 | RBM39    | RNA binding motif protein 39                                    | 8579 | -0.05384247  | -0.047718685 | 0.9787 | No |
| 90 | XAB2     | XPA binding protein 2                                           | 8810 | -0.069799893 | -0.06321904  | 0.9725 | No |
| 91 | RIPK3    | receptor-interacting serine-threonine kinase 3                  | 9127 | -0.090998687 | -0.0846094   | 0.9632 | No |
| 92 | null     | null                                                            | 9565 | -0.122611582 | -0.11425249  | 0.9521 | No |
| 93 | CCDC84   | coiled-coil domain containing 84                                | 9645 | -0.128777727 | -0.11756145  | 0.9498 | No |
| 94 | EIF4EBP1 | eukaryotic translation initiation factor 4E binding protein 1   | 9765 | -0.13685149  | -0.12364429  | 0.9458 | No |

|     |          |                                                                       |       |              |              |        |    |
|-----|----------|-----------------------------------------------------------------------|-------|--------------|--------------|--------|----|
| 95  | GBA      | glucosidase, beta; acid (includes glucosylceramidase)                 | 9779  | -0.137760833 | -0.12194749  | 0.9464 | No |
| 96  | GCNT2    | glucosaminyl (N-acetyl) transferase 2, I-branching enzyme             | 10087 | -0.1640165   | -0.14127485  | 0.9365 | No |
| 97  | GRAMD1A  | GRAM domain containing 1A                                             | 10124 | -0.167744458 | -0.1406858   | 0.9294 | No |
| 98  | USP19    | ubiquitin specific peptidase 19                                       | 10449 | -0.197956309 | -0.16060548  | 0.9238 | No |
| 99  | null     | null                                                                  | 10539 | -0.206092745 | -0.16316016  | 0.9177 | No |
| 100 | UPP1     | uridine phosphorylase 1                                               | 10609 | -0.211913824 | -0.16413835  | 0.9182 | No |
| 101 | SFRS12   | splicing factor, arginine/serine-rich 12                              | 10823 | -0.2327829   | -0.17526011  | 0.9110 | No |
| 102 | MMP2     | matrix metalloproteinase 2                                            | 10901 | -0.239376426 | -0.1762961   | 0.7629 | No |
| 103 | PTPRS    | protein tyrosine phosphatase, receptor type, S                        | 11074 | -0.256884933 | -0.18395211  | 0.9023 | No |
| 104 | null     | null                                                                  | 11363 | -0.286473572 | -0.19953364  | 0.8885 | No |
| 105 | RAG1AP1  | recombination activating gene 1 activating protein 1                  | 11464 | -0.298635185 | -0.20111449  | 0.8873 | No |
| 106 | null     | null                                                                  | 11483 | -0.300563455 | -0.19665357  | 0.8866 | No |
| 107 | null     | null                                                                  | 11958 | -0.368380368 | -0.22428064  | 0.8628 | No |
| 108 | ABHD6    | abhydrolase domain containing 6                                       | 12017 | -0.379977673 | -0.22122192  | 0.8587 | No |
| 109 | TRIM39   | tripartite motif-containing 39                                        | 12070 | -0.390130192 | -0.21752864  | 0.8552 | No |
| 110 | CCL27    | chemokine (C-C motif) ligand 27                                       | 12197 | -0.411149472 | -0.21885008  | 0.8480 | No |
| 111 | ZC3H11A  | zinc finger CCCH-type containing 11A                                  | 12275 | -0.424568295 | -0.21632533  | 0.8435 | No |
| 112 | E4F1     | E4F transcription factor 1                                            | 12508 | -0.471449494 | -0.22424951  | 0.7712 | No |
| 113 | LATS2    | LATS, large tumor suppressor, homolog 2 (Drosophila)                  | 12544 | -0.480247647 | -0.21757863  | 0.8203 | No |
| 114 | DNMT3B   | DNA (cytosine-5)-methyltransferase 3 beta                             | 12552 | -0.481605113 | -0.20883128  | 0.8243 | No |
| 115 | MAN2C1   | mannosidase, alpha, class 2C, member 1                                | 12635 | -0.504177928 | -0.205142    | 0.7884 | No |
| 116 | RAB6B    | RAB6B, member RAS oncogene family                                     | 12702 | -0.519797802 | -0.19998075  | 0.7231 | No |
| 117 | null     | null                                                                  | 12732 | -0.525663674 | -0.19199729  | 0.7413 | No |
| 118 | null     | null                                                                  | 12748 | -0.530488074 | -0.18289587  | 0.8082 | No |
| 119 | GADD45B  | growth arrest and DNA-damage-inducible, beta                          | 12765 | -0.534516692 | -0.17379022  | 0.7791 | No |
| 120 | DDB2     | damage-specific DNA binding protein 2, 48kDa                          | 12796 | -0.54305774  | -0.16554554  | 0.8041 | No |
| 121 | PURA     | purine-rich element binding protein A                                 | 13043 | -0.628503442 | -0.1714752   | 0.7767 | No |
| 122 | MYST2    | MYST histone acetyltransferase 2                                      | 13146 | -0.668242633 | -0.16609596  | 0.7642 | No |
| 123 | SERPINF1 | serpin peptidase inhibitor, clade F, member 1                         | 13216 | -0.704171419 | -0.15760939  | 0.6784 | No |
| 124 | null     | null                                                                  | 13282 | -0.741151631 | -0.14811888  | 0.6775 | No |
| 125 | null     | null                                                                  | 13370 | -0.796090245 | -0.13918307  | 0.7253 | No |
| 126 | null     | null                                                                  | 13405 | -0.827620625 | -0.12575993  | 0.7113 | No |
| 127 | GALNT3   | UDP-N-acetyl-alpha-D-galactosamine:polypeptide N-acetylgalactosaminyl | 13414 | -0.835492492 | -0.11028152  | 0.6530 | No |
| 128 | CD86     | CD86 molecule                                                         | 13486 | -0.905796707 | -0.098064706 | 0.5894 | No |
| 129 | PITPNM1  | phosphatidylinositol transfer protein, membrane-associated 1          | 13538 | -0.961303771 | -0.08331608  | 0.6775 | No |
| 130 | FLT3     | fms-related tyrosine kinase 3                                         | 13565 | -0.994784653 | -0.06609301  | 0.5194 | No |
| 131 | GPSP1    | G-protein signalling modulator 1 (AGS3-like, C. elegans)              | 13625 | -1.108088017 | -0.049107954 | 0.5087 | No |
| 132 | null     | null                                                                  | 13644 | -1.159191728 | -0.028137965 | 0.4918 | No |
| 133 | PHB      | prohibitin                                                            | 13774 | -2.011862993 | 0.001098266  | 0.4262 | No |

Table S5 Rossi DOWN WITH AGE

|                                   |                         |
|-----------------------------------|-------------------------|
| GeneSet                           | ROSSI_HSC_DOWN_WITH_AGE |
| Enrichment Score (ES)             | -0.4716309              |
| Normalized Enrichment Score (NES) | -1.4607257              |
| Nominal p-value                   | 0                       |
| FDR q-value                       | 0.054341406             |
| FWER p-Value                      | 0                       |

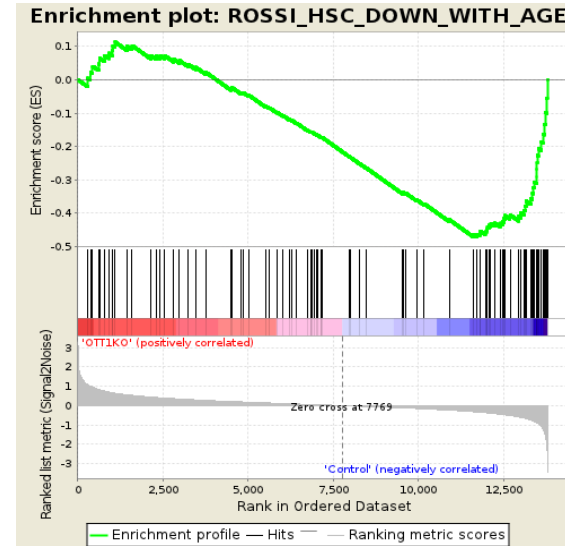

| ROV | GENE     | GENE_TITLE                                                           |
|-----|----------|----------------------------------------------------------------------|
| 0   | UAP1     | UDP-N-acteylglucosamine pyrophosphorylase 1                          |
| 1   | WDFY3    | WD repeat and FYVE domain containing 3                               |
| 2   | C1QB     | complement component 1, q subcomponent, B chain                      |
| 3   | ITGA4    | integrin, alpha 4 (antigen CD49D, alpha 4 subunit of VLA-4 receptor) |
| 4   | MKL1     | megakaryoblastic leukemia (translocation) 1                          |
| 5   | ATP6V0A2 | ATPase, H+ transporting, lysosomal V0 subunit a2                     |
| 6   | null     | null                                                                 |
| 7   | MRPS11   | mitochondrial ribosomal protein S11                                  |
| 8   | SERPINI1 | serpin peptidase inhibitor, clade I (neuroserpin), member 1          |
| 9   | PPP1R14B | protein phosphatase 1, regulatory (inhibitor) subunit 14B            |
| 10  | CABLES2  | Cdk5 and Abl enzyme substrate 2                                      |
| 11  | ATBF1    | AT-binding transcription factor 1                                    |
| 12  | null     | null                                                                 |
| 13  | null     | null                                                                 |
| 14  | FABP4    | fatty acid binding protein 4, adipocyte                              |
| 15  | TEX261   | testis expressed sequence 261                                        |
| 16  | CYBA     | cytochrome b-245, alpha polypeptide                                  |
| 17  | PPP2R3A  | protein phosphatase 2 (formerly 2A), regulatory subunit B'', alpha   |

| RANK      | RANK         | FOLD        | CORE          |
|-----------|--------------|-------------|---------------|
| GENE LIST | METRIC SCORE | RUNNING ES  | CHANGE ENRICH |
| 283       | 1.083922863  | 0.005069842 | 1.8722 No     |
| 366       | 1.003477335  | 0.022899935 | 1.5022 No     |
| 430       | 0.948919237  | 0.040821906 | 2.4644 No     |
| 606       | 0.832452178  | 0.047805883 | 1.3995 No     |
| 631       | 0.81768167   | 0.06545962  | 1.3910 No     |
| 773       | 0.753856838  | 0.07305975  | 1.3551 No     |
| 902       | 0.698218286  | 0.08028823  | 1.3381 No     |
| 1005      | 0.667275727  | 0.08867992  | 1.3080 No     |
| 1025      | 0.661586642  | 0.10299409  | 1.3050 No     |
| 1093      | 0.640198469  | 0.113297544 | 1.2937 No     |
| 1450      | 0.555465758  | 0.100498304 | 1.2500 No     |
| 1590      | 0.527976155  | 0.102883786 | 1.4532 No     |
| 2146      | 0.442839176  | 0.07288825  | 1.1943 No     |
| 2298      | 0.42086345   | 0.07185593  | 1.1838 No     |
| 2416      | 0.407205492  | 0.07298087  | 1.4125 No     |
| 2549      | 0.392816603  | 0.0726696   | 1.1867 No     |
| 2812      | 0.35968408   | 0.062084366 | 1.1550 No     |
| 2982      | 0.342542589  | 0.057879653 | 1.1471 No     |

|    |           |                                                                              |   |       |              |              |        |     |
|----|-----------|------------------------------------------------------------------------------|---|-------|--------------|--------------|--------|-----|
| 18 | ICOS      | inducible T-cell co-stimulator                                               |   | 3237  | 0.317606598  | 0.046879686  | 1.1358 | No  |
| 19 | HIST2H2BB | histone cluster 2, H2bb                                                      |   | 3459  | 0.296364397  | 0.037784003  | 1.1260 | No  |
| 20 | null      | null                                                                         |   | 3753  | 0.268605232  | 0.022774827  | 1.1135 | No  |
| 21 | LGALS1    | lectin, galactoside-binding, soluble, 1 (galectin 1)                         |   | 4497  | 0.211627111  | -0.026428478 | 1.0884 | No  |
| 22 | TMC4      | transmembrane channel-like 4                                                 |   | 4510  | 0.21008493   | -0.022318507 | 1.1038 | No  |
| 23 | CRYL1     | crystallin, lambda 1                                                         |   | 4801  | 0.189248875  | -0.03899203  | 1.0787 | No  |
| 24 | TYROBP    | TYRO protein tyrosine kinase binding protein                                 |   | 4860  | 0.184477612  | -0.038846947 | 1.0766 | No  |
| 25 | UCP2      | uncoupling protein 2 (mitochondrial, proton carrier)                         |   | 5004  | 0.174283445  | -0.045147266 | 1.0722 | No  |
| 26 | IRAK1     | interleukin-1 receptor-associated kinase 1                                   |   | 5501  | 0.141429558  | -0.07798994  | 1.0582 | No  |
| 27 | PPP2R4    | protein phosphatase 2A, regulatory subunit B' (PR 53)                        |   | 5621  | 0.134218961  | -0.08348951  | 1.0552 | No  |
| 28 | null      | null                                                                         |   | 5849  | 0.118515462  | -0.09724381  | 1.0486 | No  |
| 29 | MAPK8     | mitogen-activated protein kinase 8                                           |   | 6021  | 0.107686751  | -0.10716811  | 1.0440 | No  |
| 30 | HN1       | hematological and neurological expressed 1                                   |   | 6209  | 0.095605716  | -0.11854683  | 1.0390 | No  |
| 31 | DDX52     | DEAD (Asp-Glu-Ala-Asp) box polypeptide 52                                    |   | 6295  | 0.089999199  | -0.12261443  | 1.0367 | No  |
| 32 | TSLP      |                                                                              | 0 | 6427  | 0.081446663  | -0.13024218  | 1.0428 | No  |
| 33 | ELMO1     | engulfment and cell motility 1                                               |   | 6746  | 0.060199145  | -0.15202183  | 1.0244 | No  |
| 34 | null      | null                                                                         |   | 6832  | 0.055521879  | -0.15690765  | 1.0230 | No  |
| 35 | MTCP1     | mature T-cell proliferation 1                                                |   | 6842  | 0.054868754  | -0.15626232  | 1.0222 | No  |
| 36 | CNDP2     | CNDP dipeptidase 2 (metallopeptidase M20 family)                             |   | 6872  | 0.052774265  | -0.15712637  | 1.0213 | No  |
| 37 | ARHGAP9   | Rho GTPase activating protein 9                                              |   | 6956  | 0.046747811  | -0.16207445  | 1.0236 | No  |
| 38 | SNAPC2    | small nuclear RNA activating complex, polypeptide 2, 45kDa                   |   | 7004  | 0.043062527  | -0.16448264  | 1.0201 | No  |
| 39 | TOR1B     | torsin family 1, member B (torsin B)                                         |   | 7053  | 0.040198103  | -0.1670318   | 1.0162 | No  |
| 40 | VPREB1    | pre-B lymphocyte gene 1                                                      |   | 7138  | 0.034869537  | -0.17233476  | 1.0237 | No  |
| 41 | BCL11B    | B-cell CLL/lymphoma 11B (zinc finger protein)                                |   | 7153  | 0.033949811  | -0.17255081  | 1.0137 | No  |
| 42 | TIA1      | TIA1 cytotoxic granule-associated RNA binding protein                        |   | 7175  | 0.033153452  | -0.17329663  | 1.0133 | No  |
| 43 | TMSB10    | thymosin, beta 10                                                            |   | 7976  | -0.012741283 | -0.2313799   | 0.9949 | No  |
| 44 | SEH1L     | SEH1-like ( <i>S. cerevisiae</i> )                                           |   | 8005  | -0.014211753 | -0.23308611  | 0.9943 | No  |
| 45 | PSMA1     | proteasome (prosome, macropain) subunit, alpha type, 1                       |   | 8279  | -0.032202013 | -0.252246    | 0.9872 | No  |
| 46 | LMNA      | lamin A/C                                                                    |   | 8468  | -0.046448123 | -0.2648643   | 0.9737 | No  |
| 47 | EVI2B     | ecotropic viral integration site 2B                                          |   | 9541  | -0.120689869 | -0.34023684  | 0.9481 | No  |
| 48 | EBI3      | Epstein-Barr virus induced gene 3                                            |   | 9546  | -0.120814771 | -0.33766156  | 0.9465 | No  |
| 49 | HTF9C     |                                                                              | 0 | 9640  | -0.12847124  | -0.34140003  | 0.9499 | No  |
| 50 | FKBP2     | FK506 binding protein 2, 13kDa                                               |   | 9943  | -0.151837945 | -0.35983714  | 0.9345 | No  |
| 51 | PPP3CA    | protein phosphatase 3 (formerly 2B), catalytic subunit, alpha isoform (calci |   | 10169 | -0.171237558 | -0.3721943   | 0.9338 | No  |
| 52 | MMP2      | matrix metallopeptidase 2 (gelatinase A, 72kDa gelatinase, 72kDa type IV     |   | 10901 | -0.239376426 | -0.41986325  | 0.7629 | No  |
| 53 | CAMK1D    | calcium/calmodulin-dependent protein kinase ID                               |   | 11610 | -0.318840593 | -0.4639678   | 0.8246 | Yes |
| 54 | SDC1      | syndecan 1                                                                   |   | 11716 | -0.331531137 | -0.46376297  | 0.8068 | Yes |
| 55 | SLC16A7   | solute carrier family 16, member 7 (monocarboxylic acid transporter 2)       |   | 11799 | -0.34292677  | -0.46160913  | 0.8601 | Yes |
| 56 | CD47      | CD47 molecule                                                                |   | 11821 | -0.346952528 | -0.45490786  | 0.8702 | Yes |

|    |        |                                                                             |       |              |              |        |     |
|----|--------|-----------------------------------------------------------------------------|-------|--------------|--------------|--------|-----|
| 57 | RRM2   | ribonucleotide reductase M2 polypeptide                                     | 11963 | -0.370289207 | -0.4564106   | 0.8621 | Yes |
| 58 | SNX2   | sorting nexin 2                                                             | 11996 | -0.376019388 | -0.44982228  | 0.8601 | Yes |
| 59 | ADFP   | adipose differentiation-related protein                                     | 12026 | -0.381293953 | -0.44288984  | 0.8583 | Yes |
| 60 | CASP7  | caspase 7, apoptosis-related cysteine peptidase                             | 12069 | -0.390120953 | -0.4366967   | 0.8485 | Yes |
| 61 | GRIA3  | glutamate receptor, ionotropic, AMPA 3                                      | 12126 | -0.397057265 | -0.4313607   | 0.7994 | Yes |
| 62 | null   | null                                                                        | 12248 | -0.419777155 | -0.43022934  | 0.8451 | Yes |
| 63 | KIF23  | kinesin family member 23                                                    | 12397 | -0.445254505 | -0.43046385  | 0.8365 | Yes |
| 64 | FGF11  | fibroblast growth factor 11                                                 | 12482 | -0.466315895 | -0.4255277   | 0.8265 | Yes |
| 65 | KCNAB1 | potassium voltage-gated channel, shaker-related subfamily, beta member      | 12516 | -0.473352671 | -0.41670245  | 0.8053 | Yes |
| 66 | TOMM20 | translocase of outer mitochondrial membrane 20 homolog (yeast)              | 12545 | -0.480531216 | -0.40734193  | 0.8246 | Yes |
| 67 | null   | null                                                                        | 12690 | -0.517711282 | -0.40556496  | 0.8123 | Yes |
| 68 | S100A9 | S100 calcium binding protein A9                                             | 12947 | -0.590144754 | -0.410243    | 0.7889 | Yes |
| 69 | CD52   | CD52 molecule                                                               | 13009 | -0.613560796 | -0.40013382  | 0.7577 | Yes |
| 70 | BLNK   | B-cell linker                                                               | 13101 | -0.650014281 | -0.391349    | 0.5695 | Yes |
| 71 | PRKCB1 | protein kinase C, beta 1                                                    | 13141 | -0.666671395 | -0.37837377  | 0.7593 | Yes |
| 72 | PHLDB2 | pleckstrin homology-like domain, family B, member 2                         | 13164 | -0.675870359 | -0.36393958  | 0.6340 | Yes |
| 73 | ITGB5  | integrin, beta 5                                                            | 13301 | -0.752704263 | -0.35600188  | 0.6170 | Yes |
| 74 | IL7R   | interleukin 7 receptor                                                      | 13349 | -0.78348285  | -0.34083834  | 0.2601 | Yes |
| 75 | DUSP22 | dual specificity phosphatase 22                                             | 13371 | -0.796138048 | -0.32347694  | 0.6625 | Yes |
| 76 | null   | null                                                                        | 13403 | -0.827320159 | -0.30610535  | 0.6726 | Yes |
| 77 | SATB1  | special AT-rich sequence binding protein 1 (binds to nuclear matrix/scaffol | 13481 | -0.901102901 | -0.2903399   | 0.6468 | Yes |
| 78 | ABLIM1 | actin binding LIM protein 1                                                 | 13482 | -0.902385652 | -0.2689244   | 0.6942 | Yes |
| 79 | IVD    | isovaleryl Coenzyme A dehydrogenase                                         | 13484 | -0.905420661 | -0.24750985  | 0.6934 | Yes |
| 80 | null   | null                                                                        | 13490 | -0.909979403 | -0.22627904  | 0.6921 | Yes |
| 81 | EVL    | Enah/Vasp-like                                                              | 13523 | -0.944912553 | -0.2061897   | 0.6440 | Yes |
| 82 | EPHA7  | EPH receptor A7                                                             | 13611 | -1.066987753 | -0.1872173   | 0.6483 | Yes |
| 83 | CTSS   | cathepsin S                                                                 | 13657 | -1.190072179 | -0.16225858  | 0.5089 | Yes |
| 84 | DNTT   | deoxynucleotidyltransferase, terminal                                       | 13702 | -1.368427753 | -0.13299413  | 0.3642 | Yes |
| 85 | SCPEP1 | serine carboxypeptidase 1                                                   | 13729 | -1.550550699 | -0.098093845 | 0.5266 | Yes |
| 86 | null   | null                                                                        | 13768 | -1.89031136  | -0.056006107 | 0.4513 | Yes |
| 87 | CNN3   | calponin 3, acidic                                                          | 13785 | -2.421434641 | 0.000291899  | 0.2186 | Yes |
